# Supplementary material for: Effects of ibuprofen on gene expression in chondrocytes from patients with osteoarthritis as determined by RNA-Seq
Source: HighWire-hosted journal article supplement (doi:10.1136/rmdopen-2021-001657), 2021-09-01
Supplement: rmdopen-2021-001657supp002_data_supplement.pdf [file rmdopen-2021-001657supp002_data_supplement.pdf]

**Table S2: All genes significantly upregulated by ibuprofen in interleukin 1 $\beta$  -treated chondrocytes**

| Gene      | Name                                                                                     | Mean (IL1) | Mean (IL1+ibu) | FC          | adj. p   |
|-----------|------------------------------------------------------------------------------------------|------------|----------------|-------------|----------|
| PPARG     | peroxisome proliferator activated receptor gamma [Source:HGNC Symbol;Acc:HGNC:9236]      | 0.3        | 0.9            | <b>2.87</b> | 5.00E-06 |
| UMODL1    | uromodulin like 1 [Source:HGNC Symbol;Acc:HGNC:12560]                                    | 0.3        | 0.7            | <b>2.39</b> | 0.00106  |
| XIRP1     | xin actin binding repeat containing 1 [Source:HGNC Symbol;Acc:HGNC:14301]                | 5.7        | 13.4           | <b>2.38</b> | 0        |
| DACT1     | dishevelled binding antagonist of beta catenin 1 [Source:HGNC Symbol;Acc:HGNC:17748]     | 4.0        | 8.4            | <b>2.10</b> | 0        |
| CSF2      | colony stimulating factor 2 [Source:HGNC Symbol;Acc:HGNC:2434]                           | 5.2        | 11.2           | <b>2.09</b> | 0        |
| PPARGC1B  | PPARG coactivator 1 beta [Source:HGNC Symbol;Acc:HGNC:30022]                             | 0.4        | 0.8            | <b>2.07</b> | 0.000238 |
| DNM1P35   | dynamitin 1 pseudogene 35 [Source:HGNC Symbol;Acc:HGNC:35182]                            | 0.3        | 0.6            | <b>1.98</b> | 0.003992 |
| LINC00702 | long intergenic non-protein coding RNA 702 [Source:HGNC Symbol;Acc:HGNC:44676]           | 3.3        | 6.3            | <b>1.95</b> | 0        |
| FAM186B   | family with sequence similarity 186 member B [Source:HGNC Symbol;Acc:HGNC:25296]         | 0.4        | 0.7            | <b>1.92</b> | 0.003486 |
| SOX17     | SRY-box 17 [Source:HGNC Symbol;Acc:HGNC:18122]                                           | 3.5        | 6.8            | <b>1.91</b> | 0        |
| MTSS1     | MTSS1, I-BAR domain containing [Source:HGNC Symbol;Acc:HGNC:20443]                       | 6.9        | 12.6           | <b>1.90</b> | 0        |
| AKAP6     | A-kinase anchoring protein 6 [Source:HGNC Symbol;Acc:HGNC:376]                           | 2.1        | 3.9            | <b>1.89</b> | 0        |
| PDE5A     | phosphodiesterase 5A [Source:HGNC Symbol;Acc:HGNC:8784]                                  | 1.2        | 2.3            | <b>1.85</b> | 7.00E-06 |
| RGS2      | regulator of G protein signaling 2 [Source:HGNC Symbol;Acc:HGNC:9998]                    | 52.1       | 95.9           | <b>1.85</b> | 0        |
| OR7E12P   | olfactory receptor family 7 subfamily E member 12 pseudogene                             | 0.5        | 0.9            | <b>1.81</b> | 0.011208 |
| CAMK2A    | calcium/calmodulin dependent protein kinase II alpha [Source:HGNC Symbol;Acc:HGNC:1460]  | 1.8        | 3.3            | <b>1.81</b> | 0        |
| CSPG4P13  | chondroitin sulfate proteoglycan 4 pseudogene 13 [Source:HGNC Symbol;Acc:HGNC:49195]     | 3.8        | 6.5            | <b>1.81</b> | 0        |
| EML5      | echinoderm microtubule associated protein like 5 [Source:HGNC Symbol;Acc:HGNC:18197]     | 1.0        | 1.7            | <b>1.79</b> | 1.10E-05 |
| MAP1LC3C  | microtubule associated protein 1 light chain 3 gamma [Source:HGNC Symbol;Acc:HGNC:13353] | 0.7        | 1.2            | <b>1.79</b> | 3.30E-05 |
| NRG1      | neuregulin 1 [Source:HGNC Symbol;Acc:HGNC:7997]                                          | 0.7        | 1.3            | <b>1.78</b> | 5.90E-05 |
| SELE      | selectin E [Source:HGNC Symbol;Acc:HGNC:10718]                                           | 41.3       | 73.5           | <b>1.78</b> | 0        |
| FCRLA     | Fc receptor like A [Source:HGNC Symbol;Acc:HGNC:18504]                                   | 4.2        | 7.4            | <b>1.76</b> | 0        |
| TTC4P1    | tetratricopeptide repeat domain 4 pseudogene 1 [Source:HGNC Symbol;Acc:HGNC:12395]       | 0.6        | 1.1            | <b>1.75</b> | 0.001928 |
| DENND3    | DENN domain containing 3 [Source:HGNC Symbol;Acc:HGNC:29134]                             | 14.6       | 25.3           | <b>1.75</b> | 0        |
| SNORA33   | small nucleolar RNA, H/ACA box 33 [Source:HGNC Symbol;Acc:HGNC:32623]                    | 0.5        | 0.8            | <b>1.74</b> | 0.001637 |
| FCRLB     | Fc receptor like B [Source:HGNC Symbol;Acc:HGNC:26431]                                   | 0.8        | 1.4            | <b>1.73</b> | 3.30E-05 |
| MOXD1     | monooxygenase DBH like 1 [Source:HGNC Symbol;Acc:HGNC:21063]                             | 123.1      | 210.3          | <b>1.72</b> | 0        |
| SPNS2     | sphingolipid transporter 2 [Source:HGNC Symbol;Acc:HGNC:26992]                           | 2.4        | 4.0            | <b>1.72</b> | 0        |
| PODXL     | podocalyxin like [Source:HGNC Symbol;Acc:HGNC:9171]                                      | 11.2       | 19.0           | <b>1.71</b> | 0        |
| RP1       | RP1, axonemal microtubule associated [Source:HGNC Symbol;Acc:HGNC:10263]                 | 0.4        | 0.6            | <b>1.67</b> | 0.023302 |
| CNTNAP3B  | contactin associated protein-like 3B [Source:HGNC Symbol;Acc:HGNC:32035]                 | 0.3        | 0.6            | <b>1.66</b> | 0.038371 |
| IDO1      | indoleamine 2,3-dioxygenase 1 [Source:HGNC Symbol;Acc:HGNC:6059]                         | 1.3        | 2.1            | <b>1.65</b> | 0.001177 |
| SCUBE3    | signal peptide, CUB domain and EGF like domain containing 3                              | 42.5       | 72.5           | <b>1.64</b> | 0        |
| KCNJ15    | potassium voltage-gated channel subfamily J member 15                                    | 1.3        | 2.2            | <b>1.63</b> | 1.00E-06 |
| SERPINE1  | serpin family E member 1 [Source:HGNC Symbol;Acc:HGNC:8583]                              | 455.9      | 748.6          | <b>1.62</b> | 0        |
| PSD2      | pleckstrin and Sec7 domain containing 2 [Source:HGNC Symbol;Acc:HGNC:19092]              | 0.4        | 0.6            | <b>1.62</b> | 0.03456  |

|           |                                                                                    |        |        |             |          |
|-----------|------------------------------------------------------------------------------------|--------|--------|-------------|----------|
| LINGO1    | leucine rich repeat and Ig domain containing 1 [Source:HGNC Symbol;Acc:HGNC:21205] | 1.9    | 3.1    | <b>1.61</b> | 0        |
| AKNAD1    | AKNA domain containing 1 [Source:HGNC Symbol;Acc:HGNC:28398]                       | 0.6    | 1.0    | <b>1.60</b> | 0.004808 |
| STRA6     | stimulated by retinoic acid 6 [Source:HGNC Symbol;Acc:HGNC:30650]                  | 1.9    | 2.9    | <b>1.59</b> | 0.000583 |
| ITGAX     | integrin subunit alpha X [Source:HGNC Symbol;Acc:HGNC:6152]                        | 11.0   | 17.4   | <b>1.58</b> | 0        |
| KCNN3     | potassium calcium-activated channel subfamily N member 3                           | 2.8    | 4.3    | <b>1.58</b> | 0        |
| ICAM5     | intercellular adhesion molecule 5 [Source:HGNC Symbol;Acc:HGNC:5348]               | 4.5    | 7.2    | <b>1.58</b> | 0        |
| FGD4      | FYVE, RhoGEF and PH domain containing 4 [Source:HGNC Symbol;Acc:HGNC:19125]        | 21.9   | 34.0   | <b>1.57</b> | 0        |
| KCNN4     | potassium calcium-activated channel subfamily N member 4                           | 6.4    | 10.0   | <b>1.57</b> | 0        |
| AQP7P2    | aquaporin 7 pseudogene 2 [Source:HGNC Symbol;Acc:HGNC:32049]                       | 0.7    | 1.1    | <b>1.56</b> | 0.007679 |
| LRRRC55   | leucine rich repeat containing 55 [Source:HGNC Symbol;Acc:HGNC:32324]              | 0.8    | 1.3    | <b>1.56</b> | 0.001345 |
| CXCR3     | C-X-C motif chemokine receptor 3 [Source:HGNC Symbol;Acc:HGNC:4540]                | 0.7    | 1.1    | <b>1.55</b> | 0.016812 |
| CD24      | CD24 molecule [Source:HGNC Symbol;Acc:HGNC:1645]                                   | 5.4    | 8.5    | <b>1.55</b> | 0        |
| FGR       | FGR proto-oncogene, Src family tyrosine kinase [Source:HGNC Symbol;Acc:HGNC:3697]  | 3.4    | 5.2    | <b>1.54</b> | 0        |
| PEG10     | paternally expressed 10 [Source:HGNC Symbol;Acc:HGNC:14005]                        | 23.9   | 36.4   | <b>1.54</b> | 0        |
| SIGLEC15  | sialic acid binding Ig like lectin 15 [Source:HGNC Symbol;Acc:HGNC:27596]          | 1.6    | 2.4    | <b>1.54</b> | 0.000241 |
| CPNE2     | copine 2 [Source:HGNC Symbol;Acc:HGNC:2315]                                        | 18.7   | 28.9   | <b>1.54</b> | 0        |
| WNK4      | WNK lysine deficient protein kinase 4 [Source:HGNC Symbol;Acc:HGNC:14544]          | 4.6    | 7.0    | <b>1.53</b> | 0        |
| RTL3      | retrotransposon Gag like 3 [Source:HGNC Symbol;Acc:HGNC:22997]                     | 3.3    | 5.0    | <b>1.53</b> | 0        |
| RGS3      | regulator of G protein signaling 3 [Source:HGNC Symbol;Acc:HGNC:9999]              | 65.1   | 99.2   | <b>1.52</b> | 0        |
| AOC2      | amine oxidase, copper containing 2 [Source:HGNC Symbol;Acc:HGNC:549]               | 68.0   | 102.3  | <b>1.51</b> | 0        |
| IL10RA    | interleukin 10 receptor subunit alpha [Source:HGNC Symbol;Acc:HGNC:5964]           | 1.0    | 1.6    | <b>1.51</b> | 0.001781 |
| RGS16     | regulator of G protein signaling 16 [Source:HGNC Symbol;Acc:HGNC:9997]             | 60.1   | 90.0   | <b>1.51</b> | 0        |
| PCDH17    | protocadherin 17 [Source:HGNC Symbol;Acc:HGNC:14267]                               | 0.9    | 1.4    | <b>1.51</b> | 0.028007 |
| GPR158    | G protein-coupled receptor 158 [Source:HGNC Symbol;Acc:HGNC:23689]                 | 1.3    | 1.9    | <b>1.50</b> | 0.000172 |
| CCNE2     | cyclin E2 [Source:HGNC Symbol;Acc:HGNC:1590]                                       | 1.0    | 1.5    | <b>1.50</b> | 0.001637 |
| METTL7A   | methyltransferase like 7A [Source:HGNC Symbol;Acc:HGNC:24550]                      | 108.0  | 158.9  | <b>1.50</b> | 0        |
| CCDC141   | coiled-coil domain containing 141 [Source:HGNC Symbol;Acc:HGNC:26821]              | 2.3    | 3.4    | <b>1.49</b> | 1.30E-05 |
| GLI1      | GLI family zinc finger 1 [Source:HGNC Symbol;Acc:HGNC:4317]                        | 1.1    | 1.7    | <b>1.49</b> | 0.011342 |
| SLC4A3    | solute carrier family 4 member 3 [Source:HGNC Symbol;Acc:HGNC:11029]               | 1.1    | 1.7    | <b>1.49</b> | 0.001498 |
| CSPG4     | chondroitin sulfate proteoglycan 4 [Source:HGNC Symbol;Acc:HGNC:2466]              | 1142.2 | 1673.9 | <b>1.48</b> | 0        |
| LRFN5     | leucine rich repeat and fibronectin type III domain containing 5                   | 1.4    | 2.0    | <b>1.48</b> | 0.000221 |
| CTGF      | connective tissue growth factor [Source:HGNC Symbol;Acc:HGNC:2500]                 | 1669.1 | 2441.4 | <b>1.48</b> | 0        |
| SLC30A4   | solute carrier family 30 member 4 [Source:HGNC Symbol;Acc:HGNC:11015]              | 3.9    | 5.7    | <b>1.47</b> | 4.00E-06 |
| SYNE3     | spectrin repeat containing nuclear envelope family member 3                        | 5.9    | 8.6    | <b>1.47</b> | 0        |
| ODF3L1    | outer dense fiber of sperm tails 3 like 1 [Source:HGNC Symbol;Acc:HGNC:28735]      | 1.9    | 2.8    | <b>1.47</b> | 0.000114 |
| TTN       | titin [Source:HGNC Symbol;Acc:HGNC:12403]                                          | 3.8    | 5.3    | <b>1.47</b> | 0.007375 |
| SYN3      | synapsin III [Source:HGNC Symbol;Acc:HGNC:11496]                                   | 0.9    | 1.3    | <b>1.47</b> | 0.006747 |
| REEP1     | receptor accessory protein 1 [Source:HGNC Symbol;Acc:HGNC:25786]                   | 0.8    | 1.1    | <b>1.46</b> | 0.013854 |
| LINC01705 | long intergenic non-protein coding RNA 1705 [Source:HGNC Symbol;Acc:HGNC:52493]    | 1.7    | 2.4    | <b>1.46</b> | 0.000435 |

|           |                                                                                                       |        |        |             |          |
|-----------|-------------------------------------------------------------------------------------------------------|--------|--------|-------------|----------|
| EPHA3     | EPH receptor A3 [Source:HGNC Symbol;Acc:HGNC:3387]                                                    | 1.1    | 1.6    | <b>1.45</b> | 0.002677 |
| LOXL4     | lysyl oxidase like 4 [Source:HGNC Symbol;Acc:HGNC:17171]                                              | 365.3  | 517.4  | <b>1.45</b> | 0        |
| CLDN4     | claudin 4 [Source:HGNC Symbol;Acc:HGNC:2046]                                                          | 1.3    | 1.8    | <b>1.45</b> | 0.002675 |
| KIF21B    | kinesin family member 21B [Source:HGNC Symbol;Acc:HGNC:29442]                                         | 2.3    | 3.3    | <b>1.45</b> | 0.000109 |
| S1PR1     | sphingosine-1-phosphate receptor 1 [Source:HGNC Symbol;Acc:HGNC:3165]                                 | 8.4    | 12.0   | <b>1.44</b> | 0        |
| COL1A1    | collagen type I alpha 1 chain [Source:HGNC Symbol;Acc:HGNC:2197]                                      | 6.1    | 8.7    | <b>1.44</b> | 2.00E-06 |
| ELN       | elastin [Source:HGNC Symbol;Acc:HGNC:3327]                                                            | 9.6    | 13.3   | <b>1.44</b> | 0        |
| CNR1      | cannabinoid receptor 1 [Source:HGNC Symbol;Acc:HGNC:2159]                                             | 1.3    | 1.9    | <b>1.44</b> | 0.002688 |
| FMNL3     | formin like 3 [Source:HGNC Symbol;Acc:HGNC:23698]                                                     | 46.3   | 66.2   | <b>1.44</b> | 0        |
| POU3F1    | POU class 3 homeobox 1 [Source:HGNC Symbol;Acc:HGNC:9214]                                             | 1.9    | 2.8    | <b>1.44</b> | 0.003873 |
| TBC1D1    | TBC1 domain family member 1 [Source:HGNC Symbol;Acc:HGNC:11578]                                       | 63.2   | 90.8   | <b>1.44</b> | 0        |
| IL4I1     | interleukin 4 induced 1 [Source:HGNC Symbol;Acc:HGNC:19094]                                           | 13.0   | 18.9   | <b>1.44</b> | 0        |
| TCF7      | transcription factor 7 (T-cell specific, HMG-box) [Source:HGNC Symbol;Acc:HGNC:11639]                 | 2.1    | 2.9    | <b>1.43</b> | 0.001158 |
| RSAD2     | radical S-adenosyl methionine domain containing 2 [Source:HGNC Symbol;Acc:HGNC:30908]                 | 1.4    | 2.0    | <b>1.43</b> | 0.016706 |
| NREP      | neuronal regeneration related protein [Source:HGNC Symbol;Acc:HGNC:16834]                             | 12.3   | 17.8   | <b>1.43</b> | 0        |
| GPR176    | G protein-coupled receptor 176 [Source:HGNC Symbol;Acc:HGNC:32370]                                    | 42.7   | 60.4   | <b>1.43</b> | 0        |
| FLG       | filaggrin [Source:HGNC Symbol;Acc:HGNC:3748]                                                          | 1.3    | 1.8    | <b>1.43</b> | 0.007667 |
| SPRY2     | sprouty RTK signaling antagonist 2 [Source:HGNC Symbol;Acc:HGNC:11270]                                | 101.4  | 145.8  | <b>1.43</b> | 0        |
| SLAMF8    | SLAM family member 8 [Source:HGNC Symbol;Acc:HGNC:21391]                                              | 4.4    | 6.3    | <b>1.42</b> | 1.00E-06 |
| MAP3K7CL  | MAP3K7 C-terminal like [Source:HGNC Symbol;Acc:HGNC:16457]                                            | 16.0   | 22.5   | <b>1.42</b> | 0        |
| DLL4      | delta like canonical Notch ligand 4 [Source:HGNC Symbol;Acc:HGNC:2910]                                | 0.9    | 1.3    | <b>1.42</b> | 0.049621 |
| ITGA9     | integrin subunit alpha 9 [Source:HGNC Symbol;Acc:HGNC:6145]                                           | 3.0    | 4.3    | <b>1.42</b> | 7.60E-05 |
| RFLNA     | refilin A [Source:HGNC Symbol;Acc:HGNC:27051]                                                         | 6.0    | 8.3    | <b>1.42</b> | 0        |
| KLF6      | Kruppel like factor 6 [Source:HGNC Symbol;Acc:HGNC:2235]                                              | 246.7  | 350.1  | <b>1.42</b> | 0        |
| TP63      | tumor protein p63 [Source:HGNC Symbol;Acc:HGNC:15979]                                                 | 0.8    | 1.1    | <b>1.42</b> | 0.040254 |
| LINC01686 | long intergenic non-protein coding RNA 1686 [Source:HGNC Symbol;Acc:HGNC:27643]                       | 2.0    | 2.8    | <b>1.42</b> | 0.000326 |
| OXTR      | oxytocin receptor [Source:HGNC Symbol;Acc:HGNC:8529]                                                  | 2.6    | 3.7    | <b>1.42</b> | 1.40E-05 |
| ADRA2A    | adrenoceptor alpha 2A [Source:HGNC Symbol;Acc:HGNC:281]                                               | 2.7    | 4.0    | <b>1.41</b> | 0.000574 |
| WSCD2     | WSC domain containing 2 [Source:HGNC Symbol;Acc:HGNC:29117]                                           | 1.8    | 2.5    | <b>1.41</b> | 0.007526 |
| HDAC9     | histone deacetylase 9 [Source:HGNC Symbol;Acc:HGNC:14065]                                             | 15.6   | 21.7   | <b>1.41</b> | 0        |
| VEGFC     | vascular endothelial growth factor C [Source:HGNC Symbol;Acc:HGNC:12682]                              | 14.9   | 21.0   | <b>1.41</b> | 0        |
| ICAM4     | intercellular adhesion molecule 4 (Landsteiner-Wiener blood group) [Source:HGNC Symbol;Acc:HGNC:5347] | 47.5   | 64.7   | <b>1.41</b> | 0        |
| FOXA3     | forkhead box A3 [Source:HGNC Symbol;Acc:HGNC:5023]                                                    | 4.5    | 6.4    | <b>1.41</b> | 6.40E-05 |
| ITGB3     | integrin subunit beta 3 [Source:HGNC Symbol;Acc:HGNC:6156]                                            | 9.6    | 13.1   | <b>1.40</b> | 3.40E-05 |
| MYEOV     | myeloma overexpressed [Source:HGNC Symbol;Acc:HGNC:7563]                                              | 5.9    | 8.3    | <b>1.40</b> | 0        |
| ITGB2-AS1 | ITGB2 antisense RNA 1 [Source:HGNC Symbol;Acc:HGNC:44304]                                             | 2.4    | 3.3    | <b>1.40</b> | 8.00E-05 |
| SLC37A2   | solute carrier family 37 member 2 [Source:HGNC Symbol;Acc:HGNC:20644]                                 | 30.2   | 41.2   | <b>1.40</b> | 0        |
| CSF1      | colony stimulating factor 1 [Source:HGNC Symbol;Acc:HGNC:2432]                                        | 5526.8 | 7647.7 | <b>1.40</b> | 0        |
| CLTCL1    | clathrin heavy chain like 1 [Source:HGNC Symbol;Acc:HGNC:2093]                                        | 4.7    | 6.6    | <b>1.40</b> | 4.10E-05 |

|           |                                                                                         |        |        |             |          |
|-----------|-----------------------------------------------------------------------------------------|--------|--------|-------------|----------|
| FERMT1    | fermitin family member 1 [Source:HGNC Symbol;Acc:HGNC:15889]                            | 30.7   | 45.7   | <b>1.39</b> | 6.00E-06 |
| CD83      | CD83 molecule [Source:HGNC Symbol;Acc:HGNC:1703]                                        | 41.2   | 56.0   | <b>1.39</b> | 0        |
| CBLB      | Cbl proto-oncogene B [Source:HGNC Symbol;Acc:HGNC:1542]                                 | 30.5   | 41.8   | <b>1.39</b> | 0        |
| VCAM1     | vascular cell adhesion molecule 1 [Source:HGNC Symbol;Acc:HGNC:12663]                   | 2542.4 | 3522.1 | <b>1.39</b> | 0        |
| RPSAP52   | ribosomal protein SA pseudogene 52 [Source:HGNC Symbol;Acc:HGNC:35752]                  | 0.9    | 1.2    | <b>1.39</b> | 0.031277 |
| AOC3      | amine oxidase, copper containing 3 [Source:HGNC Symbol;Acc:HGNC:550]                    | 17.0   | 23.6   | <b>1.39</b> | 0        |
| SBSN      | suprabasin [Source:HGNC Symbol;Acc:HGNC:24950]                                          | 18.4   | 25.2   | <b>1.39</b> | 0        |
| ARC       | activity regulated cytoskeleton associated protein [Source:HGNC Symbol;Acc:HGNC:648]    | 67.0   | 95.2   | <b>1.39</b> | 0        |
| NOCT      | nocturnin [Source:HGNC Symbol;Acc:HGNC:14254]                                           | 16.5   | 22.8   | <b>1.39</b> | 0        |
| HMGA1     | high mobility group AT-hook 1 [Source:HGNC Symbol;Acc:HGNC:5010]                        | 910.8  | 1248.2 | <b>1.38</b> | 0        |
| LY75      | lymphocyte antigen 75 [Source:HGNC Symbol;Acc:HGNC:6729]                                | 1.3    | 1.8    | <b>1.38</b> | 0.025643 |
| C10orf105 | chromosome 10 open reading frame 105 [Source:HGNC Symbol;Acc:HGNC:20304]                | 3.4    | 4.6    | <b>1.38</b> | 0.000152 |
| TSPAN2    | tetraspanin 2 [Source:HGNC Symbol;Acc:HGNC:20659]                                       | 3.8    | 5.2    | <b>1.38</b> | 3.00E-06 |
| PHACTR2   | phosphatase and actin regulator 2 [Source:HGNC Symbol;Acc:HGNC:20956]                   | 18.7   | 25.5   | <b>1.38</b> | 0        |
| TRIM63    | tripartite motif containing 63 [Source:HGNC Symbol;Acc:HGNC:16007]                      | 1.5    | 2.0    | <b>1.38</b> | 0.007375 |
| KCNA1     | potassium voltage-gated channel subfamily A member 1 [Source:HGNC Symbol;Acc:HGNC:6218] | 1.6    | 2.2    | <b>1.38</b> | 0.037872 |
| PCDH19    | protocadherin 19 [Source:HGNC Symbol;Acc:HGNC:14270]                                    | 3.4    | 4.8    | <b>1.38</b> | 0.007291 |
| ZNF367    | zinc finger protein 367 [Source:HGNC Symbol;Acc:HGNC:18320]                             | 6.3    | 8.7    | <b>1.38</b> | 0        |
| NPL       | N-acetylneuraminate pyruvate lyase [Source:HGNC Symbol;Acc:HGNC:16781]                  | 2.9    | 4.0    | <b>1.38</b> | 0.000199 |
| LRRC75A   | leucine rich repeat containing 75A [Source:HGNC Symbol;Acc:HGNC:32403]                  | 1.0    | 1.3    | <b>1.38</b> | 0.032947 |
| USP53     | ubiquitin specific peptidase 53 [Source:HGNC Symbol;Acc:HGNC:29255]                     | 139.8  | 189.3  | <b>1.37</b> | 0        |
| SAA2      | serum amyloid A2 [Source:HGNC Symbol;Acc:HGNC:10514]                                    | 27.1   | 37.5   | <b>1.37</b> | 1.10E-05 |
| SAV1      | salvador family WW domain containing protein 1 [Source:HGNC Symbol;Acc:HGNC:17795]      | 84.0   | 115.1  | <b>1.37</b> | 0        |
| SERPINB2  | serpin family B member 2 [Source:HGNC Symbol;Acc:HGNC:8584]                             | 6.9    | 9.3    | <b>1.37</b> | 8.80E-05 |
| KLHL34    | kelch like family member 34 [Source:HGNC Symbol;Acc:HGNC:26634]                         | 1.0    | 1.4    | <b>1.37</b> | 0.029453 |
| FLNC      | filamin C [Source:HGNC Symbol;Acc:HGNC:3756]                                            | 2.4    | 3.4    | <b>1.37</b> | 0.015596 |
| ESPN      | espin [Source:HGNC Symbol;Acc:HGNC:13281]                                               | 2.4    | 3.2    | <b>1.37</b> | 0.001928 |
| DGKH      | diacylglycerol kinase eta [Source:HGNC Symbol;Acc:HGNC:2854]                            | 22.0   | 30.0   | <b>1.37</b> | 4.00E-06 |
| RASSF5    | Ras association domain family member 5 [Source:HGNC Symbol;Acc:HGNC:17609]              | 8.2    | 11.2   | <b>1.37</b> | 0        |
| GTSE1     | G2 and S-phase expressed 1 [Source:HGNC Symbol;Acc:HGNC:13698]                          | 1.4    | 1.9    | <b>1.36</b> | 0.019522 |
| CCDC69    | coiled-coil domain containing 69 [Source:HGNC Symbol;Acc:HGNC:24487]                    | 1.1    | 1.6    | <b>1.36</b> | 0.026745 |
| TIMP3     | TIMP metalloproteinase inhibitor 3 [Source:HGNC Symbol;Acc:HGNC:11822]                  | 907.2  | 1204.5 | <b>1.36</b> | 0        |
| KHDRBS3   | KH RNA binding domain containing, signal transduction associated 3                      | 3.2    | 4.3    | <b>1.36</b> | 0.000121 |
| HADH      | hydroxyacyl-CoA dehydrogenase [Source:HGNC Symbol;Acc:HGNC:4799]                        | 13.8   | 18.7   | <b>1.36</b> | 0        |
| RHBDL2    | rhomboid like 2 [Source:HGNC Symbol;Acc:HGNC:16083]                                     | 2.4    | 3.3    | <b>1.36</b> | 0.004592 |
| TTC9      | tetratricopeptide repeat domain 9 [Source:HGNC Symbol;Acc:HGNC:20267]                   | 5.3    | 7.2    | <b>1.36</b> | 0        |
| C1orf198  | chromosome 1 open reading frame 198 [Source:HGNC Symbol;Acc:HGNC:25900]                 | 83.3   | 112.5  | <b>1.35</b> | 0        |
| UHRF1     | ubiquitin like with PHD and ring finger domains 1 [Source:HGNC Symbol;Acc:HGNC:12556]   | 1.8    | 2.4    | <b>1.35</b> | 0.005686 |
| IL24      | interleukin 24 [Source:HGNC Symbol;Acc:HGNC:11346]                                      | 2.4    | 3.2    | <b>1.35</b> | 0.026367 |



|           |                                                                                                     |       |        |             |          |
|-----------|-----------------------------------------------------------------------------------------------------|-------|--------|-------------|----------|
| CACNB1    | calcium voltage-gated channel auxiliary subunit beta 1 [Source:HGNC Symbol;Acc:HGNC:1401]           | 7.6   | 10.3   | <b>1.35</b> | 0        |
| SCNN1A    | sodium channel epithelial 1 alpha subunit [Source:HGNC Symbol;Acc:HGNC:10599]                       | 2.5   | 3.2    | <b>1.35</b> | 0.008507 |
| SSTR2     | somatostatin receptor 2 [Source:HGNC Symbol;Acc:HGNC:11331]                                         | 52.3  | 70.3   | <b>1.35</b> | 0        |
| SEMA5A    | semaphorin 5A [Source:HGNC Symbol;Acc:HGNC:10736]                                                   | 1.8   | 2.4    | <b>1.35</b> | 0.012787 |
| RRAD      | RRAD, Ras related glycolysis inhibitor and calcium channel regulator                                | 13.4  | 18.1   | <b>1.35</b> | 0        |
| CDK5R1    | cyclin dependent kinase 5 regulatory subunit 1                                                      | 3.2   | 4.3    | <b>1.35</b> | 6.40E-05 |
| TNFSF18   | TNF superfamily member 18 [Source:HGNC Symbol;Acc:HGNC:11932]                                       | 11.3  | 15.0   | <b>1.35</b> | 0        |
| ERRFI1    | ERBB receptor feedback inhibitor 1 [Source:HGNC Symbol;Acc:HGNC:18185]                              | 961.6 | 1287.3 | <b>1.35</b> | 0        |
| IL34      | interleukin 34 [Source:HGNC Symbol;Acc:HGNC:28529]                                                  | 1.1   | 1.5    | <b>1.35</b> | 0.032037 |
| SYNPO2    | synaptopodin 2 [Source:HGNC Symbol;Acc:HGNC:17732]                                                  | 5.9   | 8.1    | <b>1.35</b> | 0.004969 |
| AIRE      | autoimmune regulator [Source:HGNC Symbol;Acc:HGNC:360]                                              | 4.2   | 5.6    | <b>1.35</b> | 2.20E-05 |
| ATP6V1C2  | ATPase H <sup>+</sup> transporting V1 subunit C2 [Source:HGNC Symbol;Acc:HGNC:18264]                | 2.5   | 3.3    | <b>1.34</b> | 0.002231 |
| AFAP1L2   | actin filament associated protein 1 like 2 [Source:HGNC Symbol;Acc:HGNC:25901]                      | 2.6   | 3.5    | <b>1.34</b> | 0.008782 |
| RBPJ      | recombination signal binding protein for immunoglobulin kappa J region                              | 151.4 | 203.1  | <b>1.34</b> | 0        |
| MYLK      | myosin light chain kinase [Source:HGNC Symbol;Acc:HGNC:7590]                                        | 2.8   | 3.7    | <b>1.34</b> | 0.004592 |
| IL36RN    | interleukin 36 receptor antagonist [Source:HGNC Symbol;Acc:HGNC:15561]                              | 119.1 | 160.5  | <b>1.34</b> | 0        |
| PDE1B     | phosphodiesterase 1B [Source:HGNC Symbol;Acc:HGNC:8775]                                             | 6.5   | 8.7    | <b>1.34</b> | 0        |
| COL13A1   | collagen type XIII alpha 1 chain [Source:HGNC Symbol;Acc:HGNC:2190]                                 | 3.7   | 5.0    | <b>1.34</b> | 0.000259 |
| MBNL1-AS1 | MBNL1 antisense RNA 1 [Source:HGNC Symbol;Acc:HGNC:44584]                                           | 9.4   | 12.7   | <b>1.34</b> | 0        |
| ABLIM1    | actin binding LIM protein 1 [Source:HGNC Symbol;Acc:HGNC:78]                                        | 6.4   | 8.4    | <b>1.34</b> | 0.000115 |
| TRPV2     | transient receptor potential cation channel subfamily V member 2                                    | 2.4   | 3.2    | <b>1.33</b> | 0.003873 |
| ALCAM     | activated leukocyte cell adhesion molecule                                                          | 32.8  | 43.1   | <b>1.33</b> | 0        |
| NEDD4L    | neural precursor cell expressed, developmentally down-regulated 4-like, E3 ubiquitin protein ligase | 31.9  | 42.3   | <b>1.33</b> | 0        |
| CTSW      | cathepsin W [Source:HGNC Symbol;Acc:HGNC:2546]                                                      | 8.3   | 11.0   | <b>1.33</b> | 1.00E-06 |
| INHBE     | inhibin beta E subunit [Source:HGNC Symbol;Acc:HGNC:24029]                                          | 1.5   | 1.9    | <b>1.33</b> | 0.041767 |
| SEMA7A    | semaphorin 7A (John Milton Hagen blood group) [Source:HGNC Symbol;Acc:HGNC:10741]                   | 22.1  | 29.4   | <b>1.33</b> | 0        |
| FABP3     | fatty acid binding protein 3 [Source:HGNC Symbol;Acc:HGNC:3557]                                     | 4.2   | 5.5    | <b>1.33</b> | 3.60E-05 |
| THSD4     | thrombospondin type 1 domain containing 4 [Source:HGNC Symbol;Acc:HGNC:25835]                       | 9.0   | 12.0   | <b>1.33</b> | 3.30E-05 |
| KBTBD12   | kelch repeat and BTB domain containing 12 [Source:HGNC Symbol;Acc:HGNC:25731]                       | 1.1   | 1.5    | <b>1.33</b> | 0.039735 |
| FAM84A    | family with sequence similarity 84 member A [Source:HGNC Symbol;Acc:HGNC:20743]                     | 1.9   | 2.5    | <b>1.33</b> | 0.009351 |
| ZFP36     | ZFP36 ring finger protein [Source:HGNC Symbol;Acc:HGNC:12862]                                       | 26.3  | 34.9   | <b>1.33</b> | 0        |
| PCDH10    | protocadherin 10 [Source:HGNC Symbol;Acc:HGNC:13404]                                                | 3.8   | 5.0    | <b>1.33</b> | 0.001302 |
| CYP2U1    | cytochrome P450 family 2 subfamily U member 1 [Source:HGNC Symbol;Acc:HGNC:20582]                   | 17.1  | 22.6   | <b>1.33</b> | 0        |
| P2RY6     | pyrimidinergic receptor P2Y6 [Source:HGNC Symbol;Acc:HGNC:8543]                                     | 3.3   | 4.2    | <b>1.33</b> | 0.005071 |
| S100A3    | S100 calcium binding protein A3 [Source:HGNC Symbol;Acc:HGNC:10493]                                 | 6.6   | 8.6    | <b>1.33</b> | 0.003118 |
| LFNG      | LFNG O-fucosylpeptide 3-beta-N-acetylglucosaminyltransferase [Source:HGNC Symbol;Acc:HGNC:6560]     | 14.2  | 18.4   | <b>1.33</b> | 2.00E-06 |
| MBNL1     | muscleblind like splicing regulator 1 [Source:HGNC Symbol;Acc:HGNC:6923]                            | 228.2 | 299.5  | <b>1.33</b> | 0        |
| CDKL1     | cyclin dependent kinase like 1 [Source:HGNC Symbol;Acc:HGNC:1781]                                   | 6.8   | 8.8    | <b>1.33</b> | 5.50E-05 |
| ATP2B4    | ATPase plasma membrane Ca <sup>2+</sup> transporting 4 [Source:HGNC Symbol;Acc:HGNC:817]            | 100.3 | 130.7  | <b>1.32</b> | 2.00E-06 |

|           |                                                                                                    |       |       |             |          |
|-----------|----------------------------------------------------------------------------------------------------|-------|-------|-------------|----------|
| DLX3      | distal-less homeobox 3 [Source:HGNC Symbol;Acc:HGNC:2916]                                          | 13.2  | 17.5  | <b>1.32</b> | 0        |
| ADRB2     | adrenoceptor beta 2 [Source:HGNC Symbol;Acc:HGNC:286]                                              | 13.6  | 17.8  | <b>1.32</b> | 0        |
| ADAMTS17  | ADAM metalloproteinase with thrombospondin type 1 motif 17 [Source:HGNC Symbol;Acc:HGNC:17109]     | 15.5  | 20.4  | <b>1.32</b> | 0        |
| SLC13A3   | solute carrier family 13 member 3 [Source:HGNC Symbol;Acc:HGNC:14430]                              | 13.5  | 17.7  | <b>1.32</b> | 0        |
| HBEGF     | heparin binding EGF like growth factor [Source:HGNC Symbol;Acc:HGNC:3059]                          | 67.0  | 88.5  | <b>1.32</b> | 0        |
| NEFM      | neurofilament medium [Source:HGNC Symbol;Acc:HGNC:7734]                                            | 13.5  | 18.3  | <b>1.32</b> | 2.00E-06 |
| CCND1     | cyclin D1 [Source:HGNC Symbol;Acc:HGNC:1582]                                                       | 447.3 | 590.5 | <b>1.32</b> | 0        |
| MEOX2     | mesenchyme homeobox 2 [Source:HGNC Symbol;Acc:HGNC:7014]                                           | 13.0  | 17.3  | <b>1.32</b> | 0        |
| SOCS2-AS1 | SOCS2 antisense RNA 1 [Source:HGNC Symbol;Acc:HGNC:27054]                                          | 2.7   | 3.5   | <b>1.32</b> | 0.000821 |
| EDA       | ectodysplasin A [Source:HGNC Symbol;Acc:HGNC:3157]                                                 | 2.0   | 2.6   | <b>1.32</b> | 0.006294 |
| CLSTN2    | calsyntenin 2 [Source:HGNC Symbol;Acc:HGNC:17448]                                                  | 1.9   | 2.5   | <b>1.32</b> | 0.023017 |
| HIVEP3    | human immunodeficiency virus type I enhancer binding protein 3 [Source:HGNC Symbol;Acc:HGNC:13561] | 5.8   | 7.6   | <b>1.31</b> | 0.002803 |
| PLCG2     | phospholipase C gamma 2 [Source:HGNC Symbol;Acc:HGNC:9066]                                         | 28.0  | 36.4  | <b>1.31</b> | 0        |
| RGCC      | regulator of cell cycle [Source:HGNC Symbol;Acc:HGNC:20369]                                        | 110.0 | 141.9 | <b>1.31</b> | 0        |
| L3MBTL4   | l(3)mbt-like 4 (Drosophila) [Source:HGNC Symbol;Acc:HGNC:26677]                                    | 7.3   | 9.4   | <b>1.31</b> | 0.000559 |
| ZNF57     | zinc finger protein 57 [Source:HGNC Symbol;Acc:HGNC:13125]                                         | 1.8   | 2.4   | <b>1.31</b> | 0.024135 |
| IL36B     | interleukin 36, beta [Source:HGNC Symbol;Acc:HGNC:15564]                                           | 23.7  | 30.8  | <b>1.31</b> | 0        |
| ATP9A     | ATPase phospholipid transporting 9A (putative) [Source:HGNC Symbol;Acc:HGNC:13540]                 | 21.6  | 27.8  | <b>1.31</b> | 1.80E-05 |
| SAMD9     | sterile alpha motif domain containing 9 [Source:HGNC Symbol;Acc:HGNC:1348]                         | 12.7  | 16.3  | <b>1.31</b> | 3.30E-05 |
| DUSP2     | dual specificity phosphatase 2 [Source:HGNC Symbol;Acc:HGNC:3068]                                  | 3.5   | 4.6   | <b>1.31</b> | 0.003673 |
| ICOSLG    | inducible T-cell costimulator ligand [Source:HGNC Symbol;Acc:HGNC:17087]                           | 10.2  | 13.4  | <b>1.31</b> | 0        |
| NRGN      | neurogranin [Source:HGNC Symbol;Acc:HGNC:8000]                                                     | 5.2   | 6.8   | <b>1.31</b> | 0.001941 |
| ATP8A1    | ATPase phospholipid transporting 8A1 [Source:HGNC Symbol;Acc:HGNC:13531]                           | 2.1   | 2.7   | <b>1.31</b> | 0.049577 |
| SAMD5     | sterile alpha motif domain containing 5 [Source:HGNC Symbol;Acc:HGNC:21180]                        | 6.1   | 7.9   | <b>1.31</b> | 0.00088  |
| FHDC1     | FH2 domain containing 1 [Source:HGNC Symbol;Acc:HGNC:29363]                                        | 22.5  | 28.9  | <b>1.31</b> | 0        |
| ANK3      | ankyrin 3 [Source:HGNC Symbol;Acc:HGNC:494]                                                        | 4.9   | 6.3   | <b>1.31</b> | 0.002237 |
| ATP8B1    | ATPase phospholipid transporting 8B1 [Source:HGNC Symbol;Acc:HGNC:3706]                            | 4.1   | 5.3   | <b>1.31</b> | 0.000226 |
| LGALS1    | galectin like [Source:HGNC Symbol;Acc:HGNC:25012]                                                  | 30.4  | 39.7  | <b>1.31</b> | 0        |
| CDK6      | cyclin dependent kinase 6 [Source:HGNC Symbol;Acc:HGNC:1777]                                       | 23.6  | 30.1  | <b>1.31</b> | 2.80E-05 |
| ERFE      | erythroferrone [Source:HGNC Symbol;Acc:HGNC:26727]                                                 | 6.5   | 8.5   | <b>1.30</b> | 1.20E-05 |
| LRRC38    | leucine rich repeat containing 38 [Source:HGNC Symbol;Acc:HGNC:27005]                              | 34.2  | 43.4  | <b>1.30</b> | 0        |
| IL36G     | interleukin 36, gamma [Source:HGNC Symbol;Acc:HGNC:15741]                                          | 29.6  | 38.8  | <b>1.30</b> | 0        |
| CMKLR1    | chemerin chemokine-like receptor 1 [Source:HGNC Symbol;Acc:HGNC:2121]                              | 13.2  | 16.8  | <b>1.30</b> | 1.00E-06 |
| AQP3      | aquaporin 3 (Gill blood group) [Source:HGNC Symbol;Acc:HGNC:636]                                   | 5.8   | 7.4   | <b>1.30</b> | 0.001138 |
| SYTL2     | synaptotagmin like 2 [Source:HGNC Symbol;Acc:HGNC:15585]                                           | 2.9   | 3.8   | <b>1.30</b> | 0.007389 |
| ARHGAP31  | Rho GTPase activating protein 31 [Source:HGNC Symbol;Acc:HGNC:29216]                               | 35.5  | 45.5  | <b>1.30</b> | 0        |
| TMEM173   | transmembrane protein 173 [Source:HGNC Symbol;Acc:HGNC:27962]                                      | 33.1  | 42.8  | <b>1.30</b> | 0        |
| SLC26A4   | solute carrier family 26 member 4 [Source:HGNC Symbol;Acc:HGNC:8818]                               | 2.1   | 2.6   | <b>1.30</b> | 0.031182 |
| IFIT2     | interferon induced protein with tetratricopeptide repeats 2 [Source:HGNC Symbol;Acc:HGNC:5409]     | 6.6   | 8.5   | <b>1.30</b> | 0.000241 |

|          |                                                                                               |        |        |             |          |
|----------|-----------------------------------------------------------------------------------------------|--------|--------|-------------|----------|
| IRX2     | iroquois homeobox 2 [Source:HGNC Symbol;Acc:HGNC:14359]                                       | 2.3    | 3.0    | <b>1.30</b> | 0.017159 |
| C3orf52  | chromosome 3 open reading frame 52 [Source:HGNC Symbol;Acc:HGNC:26255]                        | 2.6    | 3.3    | <b>1.30</b> | 0.002237 |
| NOS2     | nitric oxide synthase 2 [Source:HGNC Symbol;Acc:HGNC:7873]                                    | 1011.3 | 1324.4 | <b>1.30</b> | 0        |
| TBC1D4   | TBC1 domain family member 4 [Source:HGNC Symbol;Acc:HGNC:19165]                               | 12.2   | 15.9   | <b>1.30</b> | 6.60E-05 |
| PLXNB1   | plexin B1 [Source:HGNC Symbol;Acc:HGNC:9103]                                                  | 83.6   | 106.3  | <b>1.29</b> | 0        |
| CXCL14   | C-X-C motif chemokine ligand 14 [Source:HGNC Symbol;Acc:HGNC:10640]                           | 8.3    | 10.6   | <b>1.29</b> | 2.60E-05 |
| ARHGAP22 | Rho GTPase activating protein 22 [Source:HGNC Symbol;Acc:HGNC:30320]                          | 25.2   | 32.8   | <b>1.29</b> | 0        |
| ABCB1    | ATP binding cassette subfamily B member 1 [Source:HGNC Symbol;Acc:HGNC:40]                    | 2.8    | 3.6    | <b>1.29</b> | 0.002773 |
| LRRC15   | leucine rich repeat containing 15 [Source:HGNC Symbol;Acc:HGNC:20818]                         | 28.9   | 39.7   | <b>1.29</b> | 0.000294 |
| COLGALT2 | collagen beta(1-O)galactosyltransferase 2 [Source:HGNC Symbol;Acc:HGNC:16790]                 | 178.0  | 228.6  | <b>1.29</b> | 0        |
| SAMD4A   | sterile alpha motif domain containing 4A [Source:HGNC Symbol;Acc:HGNC:23023]                  | 94.0   | 120.1  | <b>1.29</b> | 0        |
| ICAM1    | intercellular adhesion molecule 1 [Source:HGNC Symbol;Acc:HGNC:5344]                          | 4741.3 | 6093.2 | <b>1.29</b> | 0        |
| KIAA1755 | KIAA1755 [Source:HGNC Symbol;Acc:HGNC:29372]                                                  | 57.0   | 72.8   | <b>1.29</b> | 0        |
| DNAH11   | dynein axonemal heavy chain 11 [Source:HGNC Symbol;Acc:HGNC:2942]                             | 14.4   | 17.5   | <b>1.29</b> | 0.000629 |
| SERTAD2  | SERTA domain containing 2 [Source:HGNC Symbol;Acc:HGNC:30784]                                 | 317.4  | 402.9  | <b>1.29</b> | 0        |
| MYH16    | myosin heavy chain 16 pseudogene [Source:HGNC Symbol;Acc:HGNC:31038]                          | 1.9    | 2.5    | <b>1.29</b> | 0.013202 |
| FOXL1    | forkhead box L1 [Source:HGNC Symbol;Acc:HGNC:3817]                                            | 3.6    | 4.6    | <b>1.29</b> | 0.004891 |
| TGFB3    | transforming growth factor beta receptor 3 [Source:HGNC Symbol;Acc:HGNC:11774]                | 105.3  | 135.0  | <b>1.28</b> | 0        |
| ANKDD1A  | ankyrin repeat and death domain containing 1A [Source:HGNC Symbol;Acc:HGNC:28002]             | 2.9    | 3.7    | <b>1.28</b> | 0.026285 |
| CITED4   | Cbp/p300 interacting transactivator with Glu/Asp rich carboxy-terminal domain 4               | 52.2   | 66.9   | <b>1.28</b> | 0.000165 |
| GIPIR    | gastric inhibitory polypeptide receptor [Source:HGNC Symbol;Acc:HGNC:4271]                    | 6.3    | 8.1    | <b>1.28</b> | 0.000335 |
| NRP1     | neuropilin 1 [Source:HGNC Symbol;Acc:HGNC:8004]                                               | 26.3   | 33.7   | <b>1.28</b> | 0        |
| ZC2HC1A  | zinc finger C2HC-type containing 1A [Source:HGNC Symbol;Acc:HGNC:24277]                       | 4.4    | 5.7    | <b>1.28</b> | 0.008375 |
| CDH13    | cadherin 13 [Source:HGNC Symbol;Acc:HGNC:1753]                                                | 8.7    | 11.0   | <b>1.28</b> | 1.30E-05 |
| RFTN1    | raftlin, lipid raft linker 1 [Source:HGNC Symbol;Acc:HGNC:30278]                              | 3.2    | 4.0    | <b>1.28</b> | 0.002348 |
| SAMHD1   | SAM and HD domain containing deoxynucleoside triphosphate triphosphohydrolase 1               | 2.4    | 3.1    | <b>1.28</b> | 0.008034 |
| FOXC2    | forkhead box C2 [Source:HGNC Symbol;Acc:HGNC:3801]                                            | 56.8   | 72.1   | <b>1.28</b> | 0        |
| INPP4B   | inositol polyphosphate-4-phosphatase type II B [Source:HGNC Symbol;Acc:HGNC:6075]             | 8.6    | 10.9   | <b>1.28</b> | 0.001448 |
| SLC29A1  | solute carrier family 29 member 1 (Augustine blood group) [Source:HGNC Symbol;Acc:HGNC:11003] | 79.3   | 100.2  | <b>1.28</b> | 0        |
| FAM189A2 | family with sequence similarity 189 member A2 [Source:HGNC Symbol;Acc:HGNC:24820]             | 4.2    | 5.4    | <b>1.28</b> | 0.000982 |
| TNS3     | tensin 3 [Source:HGNC Symbol;Acc:HGNC:21616]                                                  | 280.7  | 354.9  | <b>1.28</b> | 0        |
| DPP4     | dipeptidyl peptidase 4 [Source:HGNC Symbol;Acc:HGNC:3009]                                     | 29.5   | 37.2   | <b>1.28</b> | 0        |
| EFR3B    | EFR3 homolog B [Source:HGNC Symbol;Acc:HGNC:29155]                                            | 9.5    | 12.2   | <b>1.28</b> | 0.002098 |
| KITLG    | KIT ligand [Source:HGNC Symbol;Acc:HGNC:6343]                                                 | 17.9   | 22.9   | <b>1.28</b> | 1.00E-06 |
| ARSB     | arylsulfatase B [Source:HGNC Symbol;Acc:HGNC:714]                                             | 192.1  | 248.0  | <b>1.28</b> | 0        |
| MRAP2    | melanocortin 2 receptor accessory protein 2 [Source:HGNC Symbol;Acc:HGNC:21232]               | 1.7    | 2.1    | <b>1.27</b> | 0.045413 |
| FSTL3    | folliculin like 3 [Source:HGNC Symbol;Acc:HGNC:3973]                                          | 10.5   | 13.5   | <b>1.27</b> | 0.003724 |
| RHOC     | ras homolog family member C [Source:HGNC Symbol;Acc:HGNC:669]                                 | 195.6  | 248.0  | <b>1.27</b> | 0        |
| P2RY2    | purinergic receptor P2Y2 [Source:HGNC Symbol;Acc:HGNC:8541]                                   | 2.7    | 3.5    | <b>1.27</b> | 0.004264 |

|          |                                                                                                 |        |        |             |          |
|----------|-------------------------------------------------------------------------------------------------|--------|--------|-------------|----------|
| PUS10    | pseudouridylate synthase 10 [Source:HGNC Symbol;Acc:HGNC:26505]                                 | 8.0    | 10.2   | <b>1.27</b> | 8.80E-05 |
| DDAH1    | dimethylarginine dimethylaminohydrolase 1 [Source:HGNC Symbol;Acc:HGNC:2715]                    | 30.0   | 37.7   | <b>1.27</b> | 3.00E-06 |
| PDLIM5   | PDZ and LIM domain 5 [Source:HGNC Symbol;Acc:HGNC:17468]                                        | 179.0  | 228.1  | <b>1.27</b> | 0        |
| ESYT3    | extended synaptotagmin 3 [Source:HGNC Symbol;Acc:HGNC:24295]                                    | 3.2    | 4.1    | <b>1.27</b> | 0.007645 |
| FAM222A  | family with sequence similarity 222 member A [Source:HGNC Symbol;Acc:HGNC:25915]                | 19.2   | 24.4   | <b>1.27</b> | 2.80E-05 |
| EXTL1    | exostosin like glycosyltransferase 1 [Source:HGNC Symbol;Acc:HGNC:3515]                         | 4.5    | 5.6    | <b>1.27</b> | 0.001272 |
| KIAA1841 | KIAA1841 [Source:HGNC Symbol;Acc:HGNC:29387]                                                    | 4.2    | 5.2    | <b>1.27</b> | 0.002688 |
| ITGB7    | integrin subunit beta 7 [Source:HGNC Symbol;Acc:HGNC:6162]                                      | 3.9    | 4.9    | <b>1.27</b> | 0.042484 |
| WNT9A    | Wnt family member 9A [Source:HGNC Symbol;Acc:HGNC:12778]                                        | 8.1    | 10.2   | <b>1.27</b> | 0.000143 |
| ABCA13   | ATP binding cassette subfamily A member 13 [Source:HGNC Symbol;Acc:HGNC:14638]                  | 15.0   | 19.2   | <b>1.26</b> | 0.000245 |
| ADAMTS9  | ADAM metalloproteinase with thrombospondin type 1 motif 9 [Source:HGNC Symbol;Acc:HGNC:13202]   | 36.2   | 46.1   | <b>1.26</b> | 1.40E-05 |
| LIMS2    | LIM zinc finger domain containing 2 [Source:HGNC Symbol;Acc:HGNC:16084]                         | 4.4    | 5.6    | <b>1.26</b> | 0.012105 |
| ALS2CL   | ALS2 C-terminal like [Source:HGNC Symbol;Acc:HGNC:20605]                                        | 22.2   | 28.0   | <b>1.26</b> | 1.00E-06 |
| DAPK1    | death associated protein kinase 1 [Source:HGNC Symbol;Acc:HGNC:2674]                            | 9.7    | 12.3   | <b>1.26</b> | 8.30E-05 |
| MICAL2   | microtubule associated monooxygenase, calponin and LIM domain containing 2                      | 24.4   | 30.1   | <b>1.26</b> | 0.000907 |
| GEM      | GTP binding protein overexpressed in skeletal muscle [Source:HGNC Symbol;Acc:HGNC:4234]         | 92.8   | 117.1  | <b>1.26</b> | 0        |
| ATP13A2  | ATPase 13A2 [Source:HGNC Symbol;Acc:HGNC:30213]                                                 | 43.0   | 53.7   | <b>1.26</b> | 0        |
| PRKAR1B  | protein kinase cAMP-dependent type I regulatory subunit beta [Source:HGNC Symbol;Acc:HGNC:9390] | 3.6    | 4.5    | <b>1.26</b> | 0.01009  |
| LIPG     | lipase G, endothelial type [Source:HGNC Symbol;Acc:HGNC:6623]                                   | 2.7    | 3.3    | <b>1.26</b> | 0.019848 |
| P3H2     | prolyl 3-hydroxylase 2 [Source:HGNC Symbol;Acc:HGNC:19317]                                      | 574.6  | 718.1  | <b>1.26</b> | 0        |
| UCP2     | uncoupling protein 2 [Source:HGNC Symbol;Acc:HGNC:12518]                                        | 7.1    | 9.0    | <b>1.26</b> | 0.000139 |
| PLCD1    | phospholipase C delta 1 [Source:HGNC Symbol;Acc:HGNC:9060]                                      | 49.0   | 61.0   | <b>1.26</b> | 0        |
| MSC-AS1  | MSC antisense RNA 1 [Source:HGNC Symbol;Acc:HGNC:48724]                                         | 9.8    | 12.3   | <b>1.26</b> | 0        |
| ITGAM    | integrin subunit alpha M [Source:HGNC Symbol;Acc:HGNC:6149]                                     | 3.5    | 4.4    | <b>1.26</b> | 0.016083 |
| ZNF469   | zinc finger protein 469 [Source:HGNC Symbol;Acc:HGNC:23216]                                     | 19.4   | 23.6   | <b>1.26</b> | 0.004277 |
| DHRS2    | dehydrogenase/reductase 2 [Source:HGNC Symbol;Acc:HGNC:18349]                                   | 27.9   | 34.2   | <b>1.26</b> | 1.60E-05 |
| GPD1L    | glycerol-3-phosphate dehydrogenase 1-like [Source:HGNC Symbol;Acc:HGNC:28956]                   | 4.4    | 5.5    | <b>1.26</b> | 0.012019 |
| PTGIR    | prostaglandin I2 (prostacyclin) receptor (IP) [Source:HGNC Symbol;Acc:HGNC:9602]                | 10.2   | 12.7   | <b>1.26</b> | 0.001709 |
| NEFH     | neurofilament heavy [Source:HGNC Symbol;Acc:HGNC:7737]                                          | 4.2    | 5.2    | <b>1.26</b> | 0.013522 |
| SORBS1   | sorbin and SH3 domain containing 1 [Source:HGNC Symbol;Acc:HGNC:14565]                          | 14.5   | 18.1   | <b>1.26</b> | 0.000369 |
| FZD9     | frizzled class receptor 9 [Source:HGNC Symbol;Acc:HGNC:4047]                                    | 82.0   | 102.2  | <b>1.26</b> | 0        |
| KRT16    | keratin 16 [Source:HGNC Symbol;Acc:HGNC:6423]                                                   | 556.1  | 683.0  | <b>1.25</b> | 4.00E-06 |
| RAPGEF5  | Rap guanine nucleotide exchange factor 5 [Source:HGNC Symbol;Acc:HGNC:16862]                    | 2.8    | 3.6    | <b>1.25</b> | 0.014089 |
| HAS3     | hyaluronan synthase 3 [Source:HGNC Symbol;Acc:HGNC:4820]                                        | 7.5    | 9.3    | <b>1.25</b> | 0.005102 |
| SQLE     | squalene epoxidase [Source:HGNC Symbol;Acc:HGNC:11279]                                          | 64.7   | 81.0   | <b>1.25</b> | 0        |
| RASL11A  | RAS like family 11 member A [Source:HGNC Symbol;Acc:HGNC:23802]                                 | 4.3    | 5.3    | <b>1.25</b> | 0.003928 |
| GCNT4    | glucosaminyl (N-acetyl) transferase 4, core 2 [Source:HGNC Symbol;Acc:HGNC:17973]               | 8.9    | 11.1   | <b>1.25</b> | 0.000143 |
| SPP1     | secreted phosphoprotein 1 [Source:HGNC Symbol;Acc:HGNC:11255]                                   | 1629.7 | 2024.3 | <b>1.25</b> | 0        |
| CDH19    | cadherin 19 [Source:HGNC Symbol;Acc:HGNC:1758]                                                  | 14.2   | 17.7   | <b>1.25</b> | 3.50E-05 |



|            |                                                                                                      |       |       |             |          |
|------------|------------------------------------------------------------------------------------------------------|-------|-------|-------------|----------|
| SYNC       | syncoilin, intermediate filament protein [Source:HGNC Symbol;Acc:HGNC:28897]                         | 10.0  | 12.5  | <b>1.25</b> | 3.40E-05 |
| ADORA2A    | adenosine A2a receptor [Source:HGNC Symbol;Acc:HGNC:263]                                             | 4.7   | 5.9   | <b>1.25</b> | 0.001481 |
| LAMC2      | laminin subunit gamma 2 [Source:HGNC Symbol;Acc:HGNC:6493]                                           | 26.8  | 33.9  | <b>1.25</b> | 0.000581 |
| PNMA2      | paraneoplastic Ma antigen 2 [Source:HGNC Symbol;Acc:HGNC:9159]                                       | 6.1   | 7.5   | <b>1.25</b> | 0.004507 |
| ITPR3      | inositol 1,4,5-trisphosphate receptor type 3 [Source:HGNC Symbol;Acc:HGNC:6182]                      | 315.8 | 388.8 | <b>1.25</b> | 2.90E-05 |
| CHSY3      | chondroitin sulfate synthase 3 [Source:HGNC Symbol;Acc:HGNC:24293]                                   | 12.6  | 15.7  | <b>1.25</b> | 4.10E-05 |
| JPH1       | junctophilin 1 [Source:HGNC Symbol;Acc:HGNC:14201]                                                   | 2.2   | 2.7   | <b>1.25</b> | 0.031437 |
| ADAMTS10   | ADAM metalloproteinase with thrombospondin type 1 motif 10 [Source:HGNC Symbol;Acc:HGNC:13201]       | 10.8  | 13.5  | <b>1.25</b> | 4.00E-06 |
| PEX13      | peroxisomal biogenesis factor 13 [Source:HGNC Symbol;Acc:HGNC:8855]                                  | 32.6  | 41.0  | <b>1.25</b> | 2.00E-06 |
| MGLL       | monoglyceride lipase [Source:HGNC Symbol;Acc:HGNC:17038]                                             | 128.0 | 159.5 | <b>1.25</b> | 0        |
| HES6       | hes family bHLH transcription factor 6 [Source:HGNC Symbol;Acc:HGNC:18254]                           | 16.1  | 19.9  | <b>1.25</b> | 0.000723 |
| TINAGL1    | tubulointerstitial nephritis antigen like 1 [Source:HGNC Symbol;Acc:HGNC:19168]                      | 14.8  | 18.2  | <b>1.25</b> | 5.00E-06 |
| PTPRJ      | protein tyrosine phosphatase, receptor type J [Source:HGNC Symbol;Acc:HGNC:9673]                     | 36.5  | 45.0  | <b>1.25</b> | 2.50E-05 |
| SLCO4A1    | solute carrier organic anion transporter family member 4A1 [Source:HGNC Symbol;Acc:HGNC:10953]       | 13.2  | 16.5  | <b>1.25</b> | 3.00E-06 |
| HAS2       | hyaluronan synthase 2 [Source:HGNC Symbol;Acc:HGNC:4819]                                             | 28.2  | 35.0  | <b>1.25</b> | 0.004083 |
| C4orf32    | chromosome 4 open reading frame 32 [Source:HGNC Symbol;Acc:HGNC:26813]                               | 13.2  | 16.3  | <b>1.25</b> | 7.00E-06 |
| TRNP1      | TMF1-regulated nuclear protein 1 [Source:HGNC Symbol;Acc:HGNC:34348]                                 | 10.8  | 13.1  | <b>1.25</b> | 0.002471 |
| BMF        | Bcl2 modifying factor [Source:HGNC Symbol;Acc:HGNC:24132]                                            | 9.4   | 11.8  | <b>1.25</b> | 0.000168 |
| NEDD9      | neural precursor cell expressed, developmentally down-regulated 9 [Source:HGNC Symbol;Acc:HGNC:7733] | 10.0  | 12.3  | <b>1.25</b> | 0.000581 |
| PTGIS      | prostaglandin I2 synthase [Source:HGNC Symbol;Acc:HGNC:9603]                                         | 3.3   | 4.0   | <b>1.25</b> | 0.019366 |
| ITGA11     | integrin subunit alpha 11 [Source:HGNC Symbol;Acc:HGNC:6136]                                         | 47.5  | 58.9  | <b>1.25</b> | 2.40E-05 |
| TMPRSS4    | transmembrane protease, serine 4 [Source:HGNC Symbol;Acc:HGNC:11878]                                 | 2.1   | 2.6   | <b>1.24</b> | 0.037211 |
| SH3TC2     | SH3 domain and tetratricopeptide repeats 2 [Source:HGNC Symbol;Acc:HGNC:29427]                       | 5.6   | 6.9   | <b>1.24</b> | 0.048934 |
| ARHGAP5-AS | ARHGAP5 antisense RNA 1 (head to head) [Source:HGNC Symbol;Acc:HGNC:20279]                           | 3.6   | 4.4   | <b>1.24</b> | 0.019524 |
| FZD4       | frizzled class receptor 4 [Source:HGNC Symbol;Acc:HGNC:4042]                                         | 10.9  | 13.3  | <b>1.24</b> | 0.007588 |
| PLAUR      | plasminogen activator, urokinase receptor [Source:HGNC Symbol;Acc:HGNC:9053]                         | 225.2 | 277.6 | <b>1.24</b> | 0        |
| SHISA2     | shisa family member 2 [Source:HGNC Symbol;Acc:HGNC:20366]                                            | 6.6   | 8.2   | <b>1.24</b> | 0.000595 |
| PDGFA      | platelet derived growth factor subunit A [Source:HGNC Symbol;Acc:HGNC:8799]                          | 27.8  | 34.5  | <b>1.24</b> | 1.50E-05 |
| CCRL2      | C-C motif chemokine receptor like 2 [Source:HGNC Symbol;Acc:HGNC:1612]                               | 19.5  | 24.1  | <b>1.24</b> | 1.00E-06 |
| GDF11      | growth differentiation factor 11 [Source:HGNC Symbol;Acc:HGNC:4216]                                  | 3.1   | 3.9   | <b>1.24</b> | 0.018208 |
| RCSD1      | RCSD domain containing 1 [Source:HGNC Symbol;Acc:HGNC:28310]                                         | 3.8   | 4.6   | <b>1.24</b> | 0.005152 |
| DAPK2      | death associated protein kinase 2 [Source:HGNC Symbol;Acc:HGNC:2675]                                 | 23.5  | 28.9  | <b>1.24</b> | 0        |
| GADD45B    | growth arrest and DNA damage inducible beta [Source:HGNC Symbol;Acc:HGNC:4096]                       | 91.9  | 113.2 | <b>1.24</b> | 2.00E-05 |
| C4orf26    | chromosome 4 open reading frame 26 [Source:HGNC Symbol;Acc:HGNC:26300]                               | 5.1   | 6.2   | <b>1.24</b> | 0.017781 |
| PMAIP1     | phorbol-12-myristate-13-acetate-induced protein 1 [Source:HGNC Symbol;Acc:HGNC:9108]                 | 9.8   | 12.1  | <b>1.24</b> | 2.60E-05 |
| NGFR       | nerve growth factor receptor [Source:HGNC Symbol;Acc:HGNC:7809]                                      | 10.0  | 12.1  | <b>1.24</b> | 0.000532 |
| KIAA1522   | KIAA1522 [Source:HGNC Symbol;Acc:HGNC:29301]                                                         | 6.7   | 8.1   | <b>1.23</b> | 0.007667 |
| XRCC3      | X-ray repair cross complementing 3 [Source:HGNC Symbol;Acc:HGNC:12830]                               | 5.8   | 7.2   | <b>1.23</b> | 0.007667 |
| FGF18      | fibroblast growth factor 18 [Source:HGNC Symbol;Acc:HGNC:3674]                                       | 23.0  | 28.2  | <b>1.23</b> | 1.20E-05 |

|         |                                                                                                |        |        |             |          |
|---------|------------------------------------------------------------------------------------------------|--------|--------|-------------|----------|
| PCDH9   | protocadherin 9 [Source:HGNC Symbol;Acc:HGNC:8661]                                             | 20.7   | 25.7   | <b>1.23</b> | 0.014365 |
| CAPN5   | calpain 5 [Source:HGNC Symbol;Acc:HGNC:1482]                                                   | 10.3   | 12.4   | <b>1.23</b> | 0.003601 |
| IFIT3   | interferon induced protein with tetratricopeptide repeats 3 [Source:HGNC Symbol;Acc:HGNC:5411] | 36.8   | 45.0   | <b>1.23</b> | 0        |
| ITGB2   | integrin subunit beta 2 [Source:HGNC Symbol;Acc:HGNC:6155]                                     | 30.8   | 38.1   | <b>1.23</b> | 2.00E-06 |
| ADGRE5  | adhesion G protein-coupled receptor E5 [Source:HGNC Symbol;Acc:HGNC:1711]                      | 40.5   | 49.6   | <b>1.23</b> | 0        |
| SYNM    | synemin [Source:HGNC Symbol;Acc:HGNC:24466]                                                    | 140.9  | 170.8  | <b>1.23</b> | 0.003085 |
| SPINT1  | serine peptidase inhibitor, Kunitz type 1 [Source:HGNC Symbol;Acc:HGNC:11246]                  | 2.7    | 3.3    | <b>1.23</b> | 0.029274 |
| COL6A3  | collagen type VI alpha 3 chain [Source:HGNC Symbol;Acc:HGNC:2213]                              | 1183.3 | 1448.5 | <b>1.23</b> | 0.001055 |
| DSC3    | desmocollin 3 [Source:HGNC Symbol;Acc:HGNC:3037]                                               | 10.9   | 13.3   | <b>1.23</b> | 5.90E-05 |
| GPSM2   | G protein signaling modulator 2 [Source:HGNC Symbol;Acc:HGNC:29501]                            | 14.5   | 17.7   | <b>1.23</b> | 3.20E-05 |
| ZNF385C | zinc finger protein 385C [Source:HGNC Symbol;Acc:HGNC:33722]                                   | 21.0   | 25.7   | <b>1.23</b> | 0        |
| GINS3   | GINS complex subunit 3 [Source:HGNC Symbol;Acc:HGNC:25851]                                     | 8.7    | 10.6   | <b>1.23</b> | 9.50E-05 |
| RSP02   | R-spondin 2 [Source:HGNC Symbol;Acc:HGNC:28583]                                                | 25.6   | 31.3   | <b>1.23</b> | 0        |
| FGF1    | fibroblast growth factor 1 [Source:HGNC Symbol;Acc:HGNC:3665]                                  | 46.0   | 56.3   | <b>1.23</b> | 5.50E-05 |
| BEND6   | BEN domain containing 6 [Source:HGNC Symbol;Acc:HGNC:20871]                                    | 4.2    | 5.2    | <b>1.23</b> | 0.024327 |
| ASNS    | asparagine synthetase (glutamine-hydrolyzing) [Source:HGNC Symbol;Acc:HGNC:753]                | 6.4    | 7.8    | <b>1.23</b> | 0.030961 |
| ARID5A  | AT-rich interaction domain 5A [Source:HGNC Symbol;Acc:HGNC:17361]                              | 11.6   | 14.1   | <b>1.23</b> | 0.000681 |
| ETS1    | ETS proto-oncogene 1, transcription factor [Source:HGNC Symbol;Acc:HGNC:3488]                  | 288.0  | 351.2  | <b>1.23</b> | 0        |
| ITIH6   | inter-alpha-trypsin inhibitor heavy chain family member 6 [Source:HGNC Symbol;Acc:HGNC:28907]  | 73.8   | 89.6   | <b>1.23</b> | 0.002148 |
| DYSF    | dysferlin [Source:HGNC Symbol;Acc:HGNC:3097]                                                   | 13.8   | 17.0   | <b>1.23</b> | 0.000242 |
| SOX8    | SRY-box 8 [Source:HGNC Symbol;Acc:HGNC:11203]                                                  | 14.2   | 17.2   | <b>1.23</b> | 2.00E-06 |
| SPRR2E  | small proline rich protein 2E [Source:HGNC Symbol;Acc:HGNC:11265]                              | 3.2    | 3.9    | <b>1.22</b> | 0.03456  |
| KATNBL1 | katanin regulatory subunit B1 like 1 [Source:HGNC Symbol;Acc:HGNC:26199]                       | 12.0   | 14.6   | <b>1.22</b> | 6.70E-05 |
| NPTX2   | neuronal pentraxin 2 [Source:HGNC Symbol;Acc:HGNC:7953]                                        | 22.2   | 25.8   | <b>1.22</b> | 0.000543 |
| SERINC5 | serine incorporator 5 [Source:HGNC Symbol;Acc:HGNC:18825]                                      | 24.5   | 30.0   | <b>1.22</b> | 0.000893 |
| SOCS1   | suppressor of cytokine signaling 1 [Source:HGNC Symbol;Acc:HGNC:19383]                         | 6.4    | 7.7    | <b>1.22</b> | 0.040359 |
| ULBP1   | UL16 binding protein 1 [Source:HGNC Symbol;Acc:HGNC:14893]                                     | 22.1   | 26.8   | <b>1.22</b> | 0.000629 |
| PGM2L1  | phosphoglucomutase 2 like 1 [Source:HGNC Symbol;Acc:HGNC:20898]                                | 21.3   | 26.0   | <b>1.22</b> | 2.40E-05 |
| NFATC2  | nuclear factor of activated T-cells 2 [Source:HGNC Symbol;Acc:HGNC:7776]                       | 3.2    | 3.9    | <b>1.22</b> | 0.044244 |
| GAS7    | growth arrest specific 7 [Source:HGNC Symbol;Acc:HGNC:4169]                                    | 114.1  | 137.7  | <b>1.22</b> | 1.00E-06 |
| ZXDA    | zinc finger, X-linked, duplicated A [Source:HGNC Symbol;Acc:HGNC:13198]                        | 3.6    | 4.3    | <b>1.22</b> | 0.033576 |
| NET1    | neuroepithelial cell transforming 1 [Source:HGNC Symbol;Acc:HGNC:14592]                        | 16.6   | 20.2   | <b>1.22</b> | 2.00E-06 |
| DUSP7   | dual specificity phosphatase 7 [Source:HGNC Symbol;Acc:HGNC:3073]                              | 23.5   | 28.6   | <b>1.22</b> | 9.00E-06 |
| TRAF1   | TNF receptor associated factor 1 [Source:HGNC Symbol;Acc:HGNC:12031]                           | 297.0  | 360.7  | <b>1.22</b> | 1.00E-06 |
| FAM46C  | family with sequence similarity 46 member C [Source:HGNC Symbol;Acc:HGNC:24712]                | 13.3   | 16.0   | <b>1.22</b> | 0.003178 |
| EMP1    | epithelial membrane protein 1 [Source:HGNC Symbol;Acc:HGNC:3333]                               | 540.0  | 653.5  | <b>1.22</b> | 0        |
| ENDOD1  | endonuclease domain containing 1 [Source:HGNC Symbol;Acc:HGNC:29129]                           | 44.9   | 54.5   | <b>1.22</b> | 1.20E-05 |
| FAM180A | family with sequence similarity 180 member A [Source:HGNC Symbol;Acc:HGNC:33773]               | 53.5   | 63.5   | <b>1.22</b> | 0.008419 |
| MSC     | musculin [Source:HGNC Symbol;Acc:HGNC:7321]                                                    | 44.5   | 54.4   | <b>1.22</b> | 3.30E-05 |

|         |                                                                                                      |         |         |             |          |
|---------|------------------------------------------------------------------------------------------------------|---------|---------|-------------|----------|
| MEF2A   | myocyte enhancer factor 2A [Source:HGNC Symbol;Acc:HGNC:6993]                                        | 72.8    | 88.5    | <b>1.22</b> | 0        |
| LRRRC8C | leucine rich repeat containing 8 family member C [Source:HGNC Symbol;Acc:HGNC:25075]                 | 5.6     | 6.8     | <b>1.22</b> | 0.023888 |
| TRPV4   | transient receptor potential cation channel subfamily V member 4 [Source:HGNC Symbol;Acc:HGNC:18083] | 252.6   | 302.7   | <b>1.22</b> | 0        |
| SHISA4  | shisa family member 4 [Source:HGNC Symbol;Acc:HGNC:27139]                                            | 14.6    | 17.6    | <b>1.22</b> | 0.00093  |
| SCN4B   | sodium voltage-gated channel beta subunit 4 [Source:HGNC Symbol;Acc:HGNC:10592]                      | 2.6     | 3.1     | <b>1.22</b> | 0.045173 |
| ELF3    | E74 like ETS transcription factor 3 [Source:HGNC Symbol;Acc:HGNC:3318]                               | 109.1   | 131.8   | <b>1.22</b> | 0.000143 |
| GPRIN1  | G protein regulated inducer of neurite outgrowth 1 [Source:HGNC Symbol;Acc:HGNC:24835]               | 3.4     | 4.1     | <b>1.22</b> | 0.041125 |
| WNT5B   | Wnt family member 5B [Source:HGNC Symbol;Acc:HGNC:16265]                                             | 11.2    | 14.2    | <b>1.22</b> | 0.003791 |
| MEGF9   | multiple EGF like domains 9 [Source:HGNC Symbol;Acc:HGNC:3234]                                       | 13.2    | 15.9    | <b>1.22</b> | 0.00024  |
| TEP1    | telomerase associated protein 1 [Source:HGNC Symbol;Acc:HGNC:11726]                                  | 38.7    | 47.0    | <b>1.22</b> | 9.00E-05 |
| EPHB3   | EPH receptor B3 [Source:HGNC Symbol;Acc:HGNC:3394]                                                   | 19.4    | 23.6    | <b>1.22</b> | 0        |
| PTTG1IP | PTTG1 interacting protein [Source:HGNC Symbol;Acc:HGNC:13524]                                        | 1128.9  | 1368.6  | <b>1.22</b> | 0        |
| LPP     | LIM domain containing preferred translocation partner in lipoma [Source:HGNC Symbol;Acc:HGNC:6679]   | 384.1   | 460.9   | <b>1.22</b> | 0.001802 |
| PDP1    | pyruvate dehydrogenase phosphatase catalytic subunit 1 [Source:HGNC Symbol;Acc:HGNC:9279]            | 8.6     | 10.4    | <b>1.22</b> | 0.001189 |
| IGFBP3  | insulin like growth factor binding protein 3 [Source:HGNC Symbol;Acc:HGNC:5472]                      | 12286.2 | 14977.7 | <b>1.21</b> | 0        |
| FASN    | fatty acid synthase [Source:HGNC Symbol;Acc:HGNC:3594]                                               | 82.3    | 100.6   | <b>1.21</b> | 2.20E-05 |
| MYADM   | myeloid associated differentiation marker [Source:HGNC Symbol;Acc:HGNC:7544]                         | 115.6   | 139.0   | <b>1.21</b> | 1.00E-06 |
| CMAHP   | cytidine monophospho-N-acetylneuraminic acid hydroxylase, pseudogene                                 | 57.4    | 68.7    | <b>1.21</b> | 4.00E-06 |
| ADTRP   | androgen dependent TFPI regulating protein [Source:HGNC Symbol;Acc:HGNC:21214]                       | 27.1    | 32.7    | <b>1.21</b> | 0        |
| GLUL    | glutamate-ammonia ligase [Source:HGNC Symbol;Acc:HGNC:4341]                                          | 92.3    | 112.7   | <b>1.21</b> | 0        |
| TUBB2A  | tubulin beta 2A class IIa [Source:HGNC Symbol;Acc:HGNC:12412]                                        | 13.1    | 15.7    | <b>1.21</b> | 0.002098 |
| TMEM2   | transmembrane protein 2 [Source:HGNC Symbol;Acc:HGNC:11869]                                          | 58.7    | 70.8    | <b>1.21</b> | 0.001781 |
| MYO6    | myosin VI [Source:HGNC Symbol;Acc:HGNC:7605]                                                         | 32.4    | 39.0    | <b>1.21</b> | 6.00E-05 |
| HIC1    | HIC ZBTB transcriptional repressor 1 [Source:HGNC Symbol;Acc:HGNC:4909]                              | 7.6     | 9.2     | <b>1.21</b> | 0.00106  |
| SLC35E4 | solute carrier family 35 member E4 [Source:HGNC Symbol;Acc:HGNC:17058]                               | 13.0    | 15.7    | <b>1.21</b> | 4.80E-05 |
| EFHD1   | EF-hand domain family member D1 [Source:HGNC Symbol;Acc:HGNC:29556]                                  | 12.8    | 15.5    | <b>1.21</b> | 3.60E-05 |
| TMCC2   | transmembrane and coiled-coil domain family 2 [Source:HGNC Symbol;Acc:HGNC:24239]                    | 3.6     | 4.3     | <b>1.21</b> | 0.036049 |
| SMAGP   | small cell adhesion glycoprotein [Source:HGNC Symbol;Acc:HGNC:26918]                                 | 6.2     | 7.6     | <b>1.21</b> | 0.028324 |
| STPG1   | sperm tail PG-rich repeat containing 1 [Source:HGNC Symbol;Acc:HGNC:28070]                           | 7.3     | 8.8     | <b>1.21</b> | 0.001574 |
| EHD4    | EH domain containing 4 [Source:HGNC Symbol;Acc:HGNC:3245]                                            | 26.9    | 32.5    | <b>1.21</b> | 0        |
| CD9     | CD9 molecule [Source:HGNC Symbol;Acc:HGNC:1709]                                                      | 78.7    | 95.1    | <b>1.21</b> | 2.00E-06 |
| ABHD5   | abhydrolase domain containing 5 [Source:HGNC Symbol;Acc:HGNC:21396]                                  | 11.6    | 14.0    | <b>1.21</b> | 0.001055 |
| CHST3   | carbohydrate sulfotransferase 3 [Source:HGNC Symbol;Acc:HGNC:1971]                                   | 174.8   | 210.4   | <b>1.21</b> | 2.90E-05 |
| TNFAIP2 | TNF alpha induced protein 2 [Source:HGNC Symbol;Acc:HGNC:11895]                                      | 865.5   | 1046.4  | <b>1.21</b> | 0        |
| KCNK5   | potassium two pore domain channel subfamily K member 5 [Source:HGNC Symbol;Acc:HGNC:6280]            | 92.5    | 111.2   | <b>1.21</b> | 0        |
| TIAM2   | T-cell lymphoma invasion and metastasis 2 [Source:HGNC Symbol;Acc:HGNC:11806]                        | 262.1   | 315.6   | <b>1.21</b> | 1.50E-05 |
| DAB2    | DAB2, clathrin adaptor protein [Source:HGNC Symbol;Acc:HGNC:2662]                                    | 117.5   | 140.6   | <b>1.21</b> | 3.00E-06 |
| B3GLCT  | beta 3-glucosyltransferase [Source:HGNC Symbol;Acc:HGNC:20207]                                       | 9.5     | 11.5    | <b>1.21</b> | 0.000905 |
| DPYSL3  | dihydropyrimidinase like 3 [Source:HGNC Symbol;Acc:HGNC:3015]                                        | 32.7    | 39.5    | <b>1.21</b> | 2.00E-06 |

|           |                                                                                                   |       |        |             |          |
|-----------|---------------------------------------------------------------------------------------------------|-------|--------|-------------|----------|
| ISLR      | immunoglobulin superfamily containing leucine rich repeat [Source:HGNC Symbol;Acc:HGNC:6133]      | 177.4 | 207.3  | <b>1.21</b> | 4.20E-05 |
| B3GNT7    | UDP-GlcNAc:betaGal beta-1,3-N-acetylglucosaminyltransferase 7 [Source:HGNC Symbol;Acc:HGNC:18811] | 126.5 | 152.3  | <b>1.21</b> | 3.00E-06 |
| TBC1D2    | TBC1 domain family member 2 [Source:HGNC Symbol;Acc:HGNC:18026]                                   | 11.7  | 14.0   | <b>1.21</b> | 0.000282 |
| EFNB2     | ephrin B2 [Source:HGNC Symbol;Acc:HGNC:3227]                                                      | 20.8  | 24.7   | <b>1.21</b> | 0.007323 |
| PLEC      | plectin [Source:HGNC Symbol;Acc:HGNC:9069]                                                        | 913.4 | 1088.2 | <b>1.21</b> | 0.003974 |
| GFOD1     | glucose-fructose oxidoreductase domain containing 1 [Source:HGNC Symbol;Acc:HGNC:21096]           | 15.8  | 19.0   | <b>1.21</b> | 0.00485  |
| TMEM171   | transmembrane protein 171 [Source:HGNC Symbol;Acc:HGNC:27031]                                     | 6.9   | 8.3    | <b>1.21</b> | 0.047843 |
| GPR68     | G protein-coupled receptor 68 [Source:HGNC Symbol;Acc:HGNC:4519]                                  | 39.2  | 47.3   | <b>1.20</b> | 1.00E-06 |
| ABTB2     | ankyrin repeat and BTB domain containing 2 [Source:HGNC Symbol;Acc:HGNC:23842]                    | 121.9 | 146.1  | <b>1.20</b> | 1.00E-05 |
| ST6GAL1   | ST6 beta-galactoside alpha-2,6-sialyltransferase 1 [Source:HGNC Symbol;Acc:HGNC:10860]            | 53.6  | 63.8   | <b>1.20</b> | 9.70E-05 |
| MEGF6     | multiple EGF like domains 6 [Source:HGNC Symbol;Acc:HGNC:3232]                                    | 25.3  | 30.3   | <b>1.20</b> | 8.30E-05 |
| IFIH1     | interferon induced with helicase C domain 1 [Source:HGNC Symbol;Acc:HGNC:18873]                   | 13.7  | 16.4   | <b>1.20</b> | 0.000135 |
| CDKN1A    | cyclin dependent kinase inhibitor 1A [Source:HGNC Symbol;Acc:HGNC:1784]                           | 383.8 | 461.2  | <b>1.20</b> | 0        |
| PLEKHM1P1 | pleckstrin homology and RUN domain containing M1 pseudogene 1                                     | 13.2  | 15.9   | <b>1.20</b> | 0.013996 |
| COL15A1   | collagen type XV alpha 1 chain [Source:HGNC Symbol;Acc:HGNC:2192]                                 | 199.3 | 239.9  | <b>1.20</b> | 0.000108 |
| DPYSL2    | dihydropyrimidinase like 2 [Source:HGNC Symbol;Acc:HGNC:3014]                                     | 52.9  | 62.8   | <b>1.20</b> | 4.00E-06 |
| TSC22D1   | TSC22 domain family member 1 [Source:HGNC Symbol;Acc:HGNC:16826]                                  | 203.9 | 244.6  | <b>1.20</b> | 2.90E-05 |
| CYTH3     | cytohesin 3 [Source:HGNC Symbol;Acc:HGNC:9504]                                                    | 16.5  | 19.8   | <b>1.20</b> | 0.001693 |
| SYN1      | synapsin I [Source:HGNC Symbol;Acc:HGNC:11494]                                                    | 4.4   | 5.3    | <b>1.20</b> | 0.022728 |
| PVR       | poliovirus receptor [Source:HGNC Symbol;Acc:HGNC:9705]                                            | 103.1 | 122.6  | <b>1.20</b> | 4.00E-06 |
| PTPRS     | protein tyrosine phosphatase, receptor type S [Source:HGNC Symbol;Acc:HGNC:9681]                  | 79.0  | 95.0   | <b>1.20</b> | 0.001692 |
| NOV       | nephroblastoma overexpressed [Source:HGNC Symbol;Acc:HGNC:7885]                                   | 7.8   | 9.5    | <b>1.20</b> | 0.014038 |
| KIF1A     | kinesin family member 1A [Source:HGNC Symbol;Acc:HGNC:888]                                        | 7.4   | 8.5    | <b>1.20</b> | 0.041876 |
| LIMA1     | LIM domain and actin binding 1 [Source:HGNC Symbol;Acc:HGNC:24636]                                | 57.9  | 69.6   | <b>1.20</b> | 3.40E-05 |
| FGFR3     | fibroblast growth factor receptor 3 [Source:HGNC Symbol;Acc:HGNC:3690]                            | 33.0  | 39.1   | <b>1.20</b> | 8.50E-05 |
| TUBB4B    | tubulin beta 4B class IVb [Source:HGNC Symbol;Acc:HGNC:20771]                                     | 400.0 | 475.2  | <b>1.20</b> | 3.00E-06 |
| BAIAP3    | BAI1 associated protein 3 [Source:HGNC Symbol;Acc:HGNC:948]                                       | 4.2   | 5.0    | <b>1.20</b> | 0.022267 |
| OAS3      | 2'-5'-oligoadenylate synthetase 3 [Source:HGNC Symbol;Acc:HGNC:8088]                              | 10.2  | 12.2   | <b>1.20</b> | 0.003802 |
| CAPN2     | calpain 2 [Source:HGNC Symbol;Acc:HGNC:1479]                                                      | 160.8 | 192.2  | <b>1.20</b> | 1.00E-06 |
| OLFM1     | olfactomedin 1 [Source:HGNC Symbol;Acc:HGNC:17187]                                                | 33.8  | 40.0   | <b>1.20</b> | 8.60E-05 |
| FAM117A   | family with sequence similarity 117 member A [Source:HGNC Symbol;Acc:HGNC:24179]                  | 9.9   | 11.9   | <b>1.20</b> | 0.002376 |
| KIAA1161  | KIAA1161 [Source:HGNC Symbol;Acc:HGNC:19918]                                                      | 7.7   | 9.3    | <b>1.20</b> | 0.012149 |
| TNFAIP8   | TNF alpha induced protein 8 [Source:HGNC Symbol;Acc:HGNC:17260]                                   | 129.3 | 153.2  | <b>1.20</b> | 3.00E-06 |
| FRMD8     | FERM domain containing 8 [Source:HGNC Symbol;Acc:HGNC:25462]                                      | 42.9  | 51.0   | <b>1.20</b> | 2.00E-06 |
| IL27RA    | interleukin 27 receptor subunit alpha [Source:HGNC Symbol;Acc:HGNC:17290]                         | 4.7   | 5.6    | <b>1.20</b> | 0.023026 |
| DACT3     | dishevelled binding antagonist of beta catenin 3 [Source:HGNC Symbol;Acc:HGNC:30745]              | 6.7   | 7.9    | <b>1.20</b> | 0.005102 |
| FAM49A    | family with sequence similarity 49 member A [Source:HGNC Symbol;Acc:HGNC:25373]                   | 13.2  | 15.6   | <b>1.19</b> | 0.000829 |
| SGCE      | sarcoglycan epsilon [Source:HGNC Symbol;Acc:HGNC:10808]                                           | 7.0   | 8.4    | <b>1.19</b> | 0.015843 |
| AXIN2     | axin 2 [Source:HGNC Symbol;Acc:HGNC:904]                                                          | 91.7  | 108.5  | <b>1.19</b> | 1.00E-06 |



|          |                                                                                                 |        |        |             |          |
|----------|-------------------------------------------------------------------------------------------------|--------|--------|-------------|----------|
| LYN      | LYN proto-oncogene, Src family tyrosine kinase [Source:HGNC Symbol;Acc:HGNC:6735]               | 51.7   | 61.2   | <b>1.19</b> | 8.00E-06 |
| PELI1    | pellino E3 ubiquitin protein ligase 1 [Source:HGNC Symbol;Acc:HGNC:8827]                        | 61.4   | 72.9   | <b>1.19</b> | 4.00E-06 |
| HSPA12A  | heat shock protein family A (Hsp70) member 12A [Source:HGNC Symbol;Acc:HGNC:19022]              | 9.2    | 10.8   | <b>1.19</b> | 0.042528 |
| NPTXR    | neuronal pentraxin receptor [Source:HGNC Symbol;Acc:HGNC:7954]                                  | 17.7   | 20.8   | <b>1.19</b> | 0.005369 |
| SMG9     | SMG9, nonsense mediated mRNA decay factor [Source:HGNC Symbol;Acc:HGNC:25763]                   | 47.8   | 56.8   | <b>1.19</b> | 2.00E-06 |
| CRISPLD2 | cysteine rich secretory protein LCCL domain containing 2 [Source:HGNC Symbol;Acc:HGNC:25248]    | 20.0   | 23.9   | <b>1.19</b> | 0.00147  |
| GPR37L1  | G protein-coupled receptor 37 like 1 [Source:HGNC Symbol;Acc:HGNC:14923]                        | 23.4   | 27.9   | <b>1.19</b> | 0.000412 |
| ATP10A   | ATPase phospholipid transporting 10A (putative) [Source:HGNC Symbol;Acc:HGNC:13542]             | 11.7   | 13.9   | <b>1.19</b> | 0.001098 |
| PAQR4    | progesterone and adipoQ receptor family member 4 [Source:HGNC Symbol;Acc:HGNC:26386]            | 4.8    | 5.6    | <b>1.19</b> | 0.029288 |
| PIK3P1   | phosphoinositide-3-kinase interacting protein 1 [Source:HGNC Symbol;Acc:HGNC:24942]             | 50.5   | 59.2   | <b>1.19</b> | 0.000703 |
| FLT1     | fms related tyrosine kinase 1 [Source:HGNC Symbol;Acc:HGNC:3763]                                | 24.3   | 29.0   | <b>1.19</b> | 0.010943 |
| S100A16  | S100 calcium binding protein A16 [Source:HGNC Symbol;Acc:HGNC:20441]                            | 79.5   | 91.8   | <b>1.19</b> | 0.000701 |
| FZD7     | frizzled class receptor 7 [Source:HGNC Symbol;Acc:HGNC:4045]                                    | 44.4   | 52.2   | <b>1.19</b> | 0.000226 |
| BCOR     | BCL6 corepressor [Source:HGNC Symbol;Acc:HGNC:20893]                                            | 31.4   | 36.9   | <b>1.19</b> | 0.001357 |
| CX3CL1   | C-X3-C motif chemokine ligand 1 [Source:HGNC Symbol;Acc:HGNC:10647]                             | 99.6   | 117.5  | <b>1.19</b> | 6.40E-05 |
| TMSB4X   | thymosin beta 4, X-linked [Source:HGNC Symbol;Acc:HGNC:11881]                                   | 56.8   | 66.4   | <b>1.19</b> | 0.000829 |
| MTUS1    | microtubule associated scaffold protein 1 [Source:HGNC Symbol;Acc:HGNC:29789]                   | 30.2   | 35.5   | <b>1.19</b> | 0.00078  |
| MYO1E    | myosin IE [Source:HGNC Symbol;Acc:HGNC:7599]                                                    | 67.5   | 79.9   | <b>1.19</b> | 0.000155 |
| TMEM64   | transmembrane protein 64 [Source:HGNC Symbol;Acc:HGNC:25441]                                    | 8.7    | 10.2   | <b>1.19</b> | 0.011284 |
| RCAN3    | RCAN family member 3 [Source:HGNC Symbol;Acc:HGNC:3042]                                         | 11.0   | 12.9   | <b>1.19</b> | 0.002992 |
| ACAN     | aggrecan [Source:HGNC Symbol;Acc:HGNC:319]                                                      | 3871.6 | 4583.6 | <b>1.19</b> | 8.00E-06 |
| BBC3     | BCL2 binding component 3 [Source:HGNC Symbol;Acc:HGNC:17868]                                    | 10.3   | 12.2   | <b>1.19</b> | 0.004295 |
| RAPH1    | Ras association (RalGDS/AF-6) and pleckstrin homology domains 1                                 | 133.3  | 155.4  | <b>1.18</b> | 0.036304 |
| KIF3C    | kinesin family member 3C [Source:HGNC Symbol;Acc:HGNC:6321]                                     | 4.1    | 4.9    | <b>1.18</b> | 0.045621 |
| DUSP18   | dual specificity phosphatase 18 [Source:HGNC Symbol;Acc:HGNC:18484]                             | 7.5    | 8.8    | <b>1.18</b> | 0.015233 |
| LOXL1    | lysyl oxidase like 1 [Source:HGNC Symbol;Acc:HGNC:6665]                                         | 15.5   | 18.1   | <b>1.18</b> | 0.033576 |
| STOML1   | stomatol like 1 [Source:HGNC Symbol;Acc:HGNC:14560]                                             | 22.3   | 26.4   | <b>1.18</b> | 0.001145 |
| RDH10    | retinol dehydrogenase 10 [Source:HGNC Symbol;Acc:HGNC:19975]                                    | 20.6   | 24.4   | <b>1.18</b> | 2.70E-05 |
| SH3BP2   | SH3 domain binding protein 2 [Source:HGNC Symbol;Acc:HGNC:10825]                                | 49.6   | 58.5   | <b>1.18</b> | 3.00E-06 |
| KLHL21   | kelch like family member 21 [Source:HGNC Symbol;Acc:HGNC:29041]                                 | 502.2  | 589.5  | <b>1.18</b> | 3.00E-06 |
| GPR153   | G protein-coupled receptor 153 [Source:HGNC Symbol;Acc:HGNC:23618]                              | 6.6    | 7.8    | <b>1.18</b> | 0.022971 |
| DGKD     | diacylglycerol kinase delta [Source:HGNC Symbol;Acc:HGNC:2851]                                  | 11.4   | 13.4   | <b>1.18</b> | 0.011577 |
| CDC42EP2 | CDC42 effector protein 2 [Source:HGNC Symbol;Acc:HGNC:16263]                                    | 8.4    | 9.9    | <b>1.18</b> | 0.00721  |
| OSBPL3   | oxysterol binding protein like 3 [Source:HGNC Symbol;Acc:HGNC:16370]                            | 6.3    | 7.5    | <b>1.18</b> | 0.015429 |
| S100A4   | S100 calcium binding protein A4 [Source:HGNC Symbol;Acc:HGNC:10494]                             | 10.2   | 12.0   | <b>1.18</b> | 0.03032  |
| KLF3     | Kruppel like factor 3 [Source:HGNC Symbol;Acc:HGNC:16516]                                       | 115.0  | 135.4  | <b>1.18</b> | 0.001018 |
| GDPD5    | glycerophosphodiester phosphodiesterase domain containing 5 [Source:HGNC Symbol;Acc:HGNC:28804] | 25.9   | 30.1   | <b>1.18</b> | 0.000736 |
| SDC4     | syndecan 4 [Source:HGNC Symbol;Acc:HGNC:10661]                                                  | 1318.5 | 1536.6 | <b>1.18</b> | 0.000238 |
| PLXNA2   | plexin A2 [Source:HGNC Symbol;Acc:HGNC:9100]                                                    | 29.7   | 34.6   | <b>1.18</b> | 0.008253 |

|           |                                                                                                |        |        |             |          |
|-----------|------------------------------------------------------------------------------------------------|--------|--------|-------------|----------|
| BCL2      | BCL2, apoptosis regulator [Source:HGNC Symbol;Acc:HGNC:990]                                    | 71.1   | 82.5   | <b>1.18</b> | 0.00095  |
| ARNTL2    | aryl hydrocarbon receptor nuclear translocator like 2 [Source:HGNC Symbol;Acc:HGNC:18984]      | 12.4   | 14.6   | <b>1.18</b> | 0.007195 |
| SLCO3A1   | solute carrier organic anion transporter family member 3A1 [Source:HGNC Symbol;Acc:HGNC:10952] | 64.3   | 75.6   | <b>1.18</b> | 6.00E-06 |
| SLC39A10  | solute carrier family 39 member 10 [Source:HGNC Symbol;Acc:HGNC:20861]                         | 9.8    | 11.5   | <b>1.18</b> | 0.031936 |
| TGFB1     | transforming growth factor beta 1 [Source:HGNC Symbol;Acc:HGNC:11766]                          | 2182.0 | 2572.2 | <b>1.18</b> | 3.00E-06 |
| TMEM204   | transmembrane protein 204 [Source:HGNC Symbol;Acc:HGNC:14158]                                  | 34.1   | 39.7   | <b>1.18</b> | 0.000143 |
| GRAMD3    | GRAM domain containing 3 [Source:HGNC Symbol;Acc:HGNC:24911]                                   | 24.3   | 28.6   | <b>1.18</b> | 5.10E-05 |
| SH2B3     | SH2B adaptor protein 3 [Source:HGNC Symbol;Acc:HGNC:29605]                                     | 18.5   | 21.7   | <b>1.18</b> | 0.021229 |
| CXCL10    | C-X-C motif chemokine ligand 10 [Source:HGNC Symbol;Acc:HGNC:10637]                            | 9.6    | 10.9   | <b>1.18</b> | 0.026385 |
| LHFPL2    | lipoma HMGIC fusion partner-like 2 [Source:HGNC Symbol;Acc:HGNC:6588]                          | 136.1  | 158.3  | <b>1.18</b> | 0.000124 |
| TENM3     | teneurin transmembrane protein 3 [Source:HGNC Symbol;Acc:HGNC:29944]                           | 11.4   | 13.2   | <b>1.18</b> | 0.045405 |
| AIDA      | axin interactor, dorsalization associated [Source:HGNC Symbol;Acc:HGNC:25761]                  | 11.6   | 13.6   | <b>1.18</b> | 0.001221 |
| BAG3      | BCL2 associated athanogene 3 [Source:HGNC Symbol;Acc:HGNC:939]                                 | 94.7   | 110.8  | <b>1.18</b> | 1.20E-05 |
| RNF19A    | ring finger protein 19A, RBR E3 ubiquitin protein ligase [Source:HGNC Symbol;Acc:HGNC:13432]   | 30.7   | 35.8   | <b>1.18</b> | 9.40E-05 |
| GNG2      | G protein subunit gamma 2 [Source:HGNC Symbol;Acc:HGNC:4404]                                   | 8.7    | 10.2   | <b>1.17</b> | 0.031437 |
| LINC00511 | long intergenic non-protein coding RNA 511 [Source:HGNC Symbol;Acc:HGNC:43564]                 | 41.0   | 47.2   | <b>1.17</b> | 0.000993 |
| FKBP5     | FK506 binding protein 5 [Source:HGNC Symbol;Acc:HGNC:3721]                                     | 12.7   | 14.8   | <b>1.17</b> | 0.017059 |
| RAET1L    | retinoic acid early transcript 1L [Source:HGNC Symbol;Acc:HGNC:16798]                          | 4.9    | 5.8    | <b>1.17</b> | 0.036966 |
| PML       | promyelocytic leukemia [Source:HGNC Symbol;Acc:HGNC:9113]                                      | 54.3   | 63.7   | <b>1.17</b> | 4.70E-05 |
| ITGA3     | integrin subunit alpha 3 [Source:HGNC Symbol;Acc:HGNC:6139]                                    | 172.5  | 201.6  | <b>1.17</b> | 1.50E-05 |
| TYRO3     | TYRO3 protein tyrosine kinase [Source:HGNC Symbol;Acc:HGNC:12446]                              | 8.6    | 10.0   | <b>1.17</b> | 0.017937 |
| IGF2BP2   | insulin like growth factor 2 mRNA binding protein 2 [Source:HGNC Symbol;Acc:HGNC:28867]        | 8.9    | 10.4   | <b>1.17</b> | 0.013466 |
| HMOX1     | heme oxygenase 1 [Source:HGNC Symbol;Acc:HGNC:5013]                                            | 943.8  | 1102.9 | <b>1.17</b> | 0.001138 |
| ANXA5     | annexin A5 [Source:HGNC Symbol;Acc:HGNC:543]                                                   | 907.5  | 1065.1 | <b>1.17</b> | 4.00E-06 |
| DOPEY2    | dopey family member 2 [Source:HGNC Symbol;Acc:HGNC:1291]                                       | 12.3   | 14.3   | <b>1.17</b> | 0.039812 |
| NCS1      | neuronal calcium sensor 1 [Source:HGNC Symbol;Acc:HGNC:3953]                                   | 9.8    | 11.4   | <b>1.17</b> | 0.015391 |
| AVIL      | advillin [Source:HGNC Symbol;Acc:HGNC:14188]                                                   | 10.1   | 11.8   | <b>1.17</b> | 0.036926 |
| AKAP12    | A-kinase anchoring protein 12 [Source:HGNC Symbol;Acc:HGNC:370]                                | 77.8   | 92.8   | <b>1.17</b> | 0.046392 |
| SORT1     | sortilin 1 [Source:HGNC Symbol;Acc:HGNC:11186]                                                 | 50.9   | 57.7   | <b>1.17</b> | 0.002452 |
| AGT       | angiotensinogen [Source:HGNC Symbol;Acc:HGNC:333]                                              | 11.8   | 13.7   | <b>1.17</b> | 0.013938 |
| SRD5A1    | steroid 5 alpha-reductase 1 [Source:HGNC Symbol;Acc:HGNC:11284]                                | 11.6   | 13.5   | <b>1.17</b> | 0.005071 |
| VAT1      | vesicle amine transport 1 [Source:HGNC Symbol;Acc:HGNC:16919]                                  | 94.7   | 110.4  | <b>1.17</b> | 3.40E-05 |
| CD109     | CD109 molecule [Source:HGNC Symbol;Acc:HGNC:21685]                                             | 159.1  | 184.9  | <b>1.17</b> | 0.00565  |
| KLF9      | Kruppel like factor 9 [Source:HGNC Symbol;Acc:HGNC:1123]                                       | 24.0   | 28.0   | <b>1.17</b> | 7.40E-05 |
| MGAT4A    | mannosyl (alpha-1,3-)-glycoprotein beta-1,4-N-acetylglucosaminyltransferase, isozyme A         | 11.8   | 13.8   | <b>1.17</b> | 0.00106  |
| DIXDC1    | DIX domain containing 1 [Source:HGNC Symbol;Acc:HGNC:23695]                                    | 15.3   | 17.7   | <b>1.17</b> | 0.007016 |
| PAK1      | p21 (RAC1) activated kinase 1 [Source:HGNC Symbol;Acc:HGNC:8590]                               | 4.8    | 5.6    | <b>1.17</b> | 0.049249 |
| ZNF468    | zinc finger protein 468 [Source:HGNC Symbol;Acc:HGNC:33105]                                    | 9.3    | 10.7   | <b>1.17</b> | 0.037575 |
| FLI1      | Fli-1 proto-oncogene, ETS transcription factor [Source:HGNC Symbol;Acc:HGNC:3749]              | 11.7   | 13.7   | <b>1.17</b> | 0.001943 |

|           |                                                                                                  |       |       |             |          |
|-----------|--------------------------------------------------------------------------------------------------|-------|-------|-------------|----------|
| SLC39A11  | solute carrier family 39 member 11 [Source:HGNC Symbol;Acc:HGNC:14463]                           | 10.7  | 12.4  | <b>1.17</b> | 0.011709 |
| RAB11FIP4 | RAB11 family interacting protein 4 [Source:HGNC Symbol;Acc:HGNC:30267]                           | 37.7  | 43.5  | <b>1.17</b> | 0.002452 |
| GBP4      | guanylate binding protein 4 [Source:HGNC Symbol;Acc:HGNC:20480]                                  | 6.0   | 7.0   | <b>1.17</b> | 0.048084 |
| KCTD12    | potassium channel tetramerization domain containing 12 [Source:HGNC Symbol;Acc:HGNC:14678]       | 43.0  | 50.0  | <b>1.17</b> | 0.012466 |
| TRIM3     | tripartite motif containing 3 [Source:HGNC Symbol;Acc:HGNC:10064]                                | 6.6   | 7.6   | <b>1.17</b> | 0.020821 |
| ABCC5     | ATP binding cassette subfamily C member 5 [Source:HGNC Symbol;Acc:HGNC:56]                       | 12.5  | 14.6  | <b>1.17</b> | 0.012523 |
| ZCCHC14   | zinc finger CCHC-type containing 14 [Source:HGNC Symbol;Acc:HGNC:24134]                          | 60.9  | 70.7  | <b>1.17</b> | 0.002623 |
| TUBA1A    | tubulin alpha 1a [Source:HGNC Symbol;Acc:HGNC:20766]                                             | 21.8  | 25.2  | <b>1.17</b> | 0.027339 |
| PIM1      | Pim-1 proto-oncogene, serine/threonine kinase [Source:HGNC Symbol;Acc:HGNC:8986]                 | 59.5  | 68.9  | <b>1.17</b> | 0.000256 |
| CELSR1    | cadherin EGF LAG seven-pass G-type receptor 1 [Source:HGNC Symbol;Acc:HGNC:1850]                 | 52.1  | 60.6  | <b>1.17</b> | 0.00435  |
| MSI2      | musashi RNA binding protein 2 [Source:HGNC Symbol;Acc:HGNC:18585]                                | 79.5  | 92.0  | <b>1.17</b> | 0.000449 |
| KCNQ1     | potassium voltage-gated channel modifier subfamily G member 1 [Source:HGNC Symbol;Acc:HGNC:6248] | 9.2   | 10.6  | <b>1.17</b> | 0.017175 |
| PKD2      | polycystin 2, transient receptor potential cation channel [Source:HGNC Symbol;Acc:HGNC:9009]     | 106.6 | 124.1 | <b>1.17</b> | 0.003631 |
| HIP1      | huntingtin interacting protein 1 [Source:HGNC Symbol;Acc:HGNC:4913]                              | 17.1  | 19.9  | <b>1.16</b> | 0.002106 |
| FNIP2     | folliculin interacting protein 2 [Source:HGNC Symbol;Acc:HGNC:29280]                             | 38.0  | 43.7  | <b>1.16</b> | 0.001774 |
| HAUS3     | HAUS augmin like complex subunit 3 [Source:HGNC Symbol;Acc:HGNC:28719]                           | 12.1  | 14.1  | <b>1.16</b> | 0.004115 |
| HIST2H2BE | histone cluster 2 H2B family member e [Source:HGNC Symbol;Acc:HGNC:4760]                         | 57.4  | 65.9  | <b>1.16</b> | 0.002773 |
| SVIL      | supervillin [Source:HGNC Symbol;Acc:HGNC:11480]                                                  | 90.2  | 104.3 | <b>1.16</b> | 0.003928 |
| CHST1     | carbohydrate sulfotransferase 1 [Source:HGNC Symbol;Acc:HGNC:1969]                               | 10.6  | 12.3  | <b>1.16</b> | 0.006247 |
| RAD51D    | RAD51 paralog D [Source:HGNC Symbol;Acc:HGNC:9823]                                               | 6.5   | 7.5   | <b>1.16</b> | 0.029053 |
| LBH       | limb bud and heart development [Source:HGNC Symbol;Acc:HGNC:29532]                               | 37.1  | 43.0  | <b>1.16</b> | 0.000427 |
| PLCB3     | phospholipase C beta 3 [Source:HGNC Symbol;Acc:HGNC:9056]                                        | 10.2  | 11.8  | <b>1.16</b> | 0.007725 |
| CCSER2    | coiled-coil serine rich protein 2 [Source:HGNC Symbol;Acc:HGNC:29197]                            | 50.7  | 58.3  | <b>1.16</b> | 0.001326 |
| ELF4      | E74 like ETS transcription factor 4 [Source:HGNC Symbol;Acc:HGNC:3319]                           | 17.8  | 20.7  | <b>1.16</b> | 0.007305 |
| FZD1      | frizzled class receptor 1 [Source:HGNC Symbol;Acc:HGNC:4038]                                     | 59.0  | 68.5  | <b>1.16</b> | 0.000101 |
| TGM2      | transglutaminase 2 [Source:HGNC Symbol;Acc:HGNC:11778]                                           | 698.3 | 804.5 | <b>1.16</b> | 3.00E-06 |
| ATF3      | activating transcription factor 3 [Source:HGNC Symbol;Acc:HGNC:785]                              | 29.8  | 34.6  | <b>1.16</b> | 0.000732 |
| CYR61     | cysteine rich angiogenic inducer 61 [Source:HGNC Symbol;Acc:HGNC:2654]                           | 397.8 | 464.2 | <b>1.16</b> | 0.000168 |
| TRIM47    | tripartite motif containing 47 [Source:HGNC Symbol;Acc:HGNC:19020]                               | 31.6  | 36.5  | <b>1.16</b> | 0.000263 |
| KLF4      | Kruppel like factor 4 [Source:HGNC Symbol;Acc:HGNC:6348]                                         | 141.1 | 163.4 | <b>1.16</b> | 1.50E-05 |
| DYRK2     | dual specificity tyrosine phosphorylation regulated kinase 2 [Source:HGNC Symbol;Acc:HGNC:3093]  | 17.1  | 19.8  | <b>1.16</b> | 0.000821 |
| MICAL2    | MICAL like 2 [Source:HGNC Symbol;Acc:HGNC:29672]                                                 | 21.2  | 24.8  | <b>1.16</b> | 0.022483 |
| RARB      | retinoic acid receptor beta [Source:HGNC Symbol;Acc:HGNC:9865]                                   | 19.9  | 23.0  | <b>1.16</b> | 0.001157 |
| HAPLN3    | hyaluronan and proteoglycan link protein 3 [Source:HGNC Symbol;Acc:HGNC:21446]                   | 24.5  | 28.3  | <b>1.16</b> | 0.008289 |
| AMPD3     | adenosine monophosphate deaminase 3 [Source:HGNC Symbol;Acc:HGNC:470]                            | 120.8 | 139.9 | <b>1.16</b> | 0.000351 |
| ITGA5     | integrin subunit alpha 5 [Source:HGNC Symbol;Acc:HGNC:6141]                                      | 796.5 | 919.3 | <b>1.16</b> | 9.30E-05 |
| PKN3      | protein kinase N3 [Source:HGNC Symbol;Acc:HGNC:17999]                                            | 41.4  | 47.8  | <b>1.16</b> | 0.000692 |
| CNKSR3    | CNKSR family member 3 [Source:HGNC Symbol;Acc:HGNC:23034]                                        | 13.8  | 16.1  | <b>1.16</b> | 0.004589 |
| CHST2     | carbohydrate sulfotransferase 2 [Source:HGNC Symbol;Acc:HGNC:1970]                               | 87.2  | 101.8 | <b>1.16</b> | 0.000177 |

|           |                                                                                            |        |        |             |          |
|-----------|--------------------------------------------------------------------------------------------|--------|--------|-------------|----------|
| THRA      | thyroid hormone receptor, alpha [Source:HGNC Symbol;Acc:HGNC:11796]                        | 29.6   | 34.3   | <b>1.16</b> | 8.90E-05 |
| NECTIN3   | nectin cell adhesion molecule 3 [Source:HGNC Symbol;Acc:HGNC:17664]                        | 25.1   | 29.0   | <b>1.16</b> | 0.000703 |
| TPST2     | tyrosylprotein sulfotransferase 2 [Source:HGNC Symbol;Acc:HGNC:12021]                      | 15.9   | 18.2   | <b>1.16</b> | 0.013091 |
| MAP3K8    | mitogen-activated protein kinase kinase kinase 8 [Source:HGNC Symbol;Acc:HGNC:6860]        | 76.4   | 88.6   | <b>1.16</b> | 0.000126 |
| RBM47     | RNA binding motif protein 47 [Source:HGNC Symbol;Acc:HGNC:30358]                           | 7.0    | 8.1    | <b>1.16</b> | 0.031474 |
| SDHA      | succinate dehydrogenase complex flavoprotein subunit A [Source:HGNC Symbol;Acc:HGNC:10680] | 83.6   | 98.0   | <b>1.16</b> | 0.000302 |
| STX2      | syntaxin 2 [Source:HGNC Symbol;Acc:HGNC:3403]                                              | 13.2   | 15.2   | <b>1.16</b> | 0.001189 |
| STEAP4    | STEAP4 metalloredutase [Source:HGNC Symbol;Acc:HGNC:21923]                                 | 24.7   | 28.4   | <b>1.16</b> | 0.008763 |
| SOCS2     | suppressor of cytokine signaling 2 [Source:HGNC Symbol;Acc:HGNC:19382]                     | 20.9   | 24.3   | <b>1.16</b> | 0.005459 |
| ARHGAP10  | Rho GTPase activating protein 10 [Source:HGNC Symbol;Acc:HGNC:26099]                       | 16.2   | 18.8   | <b>1.16</b> | 0.012149 |
| JUP       | junction plakoglobin [Source:HGNC Symbol;Acc:HGNC:6207]                                    | 16.8   | 19.6   | <b>1.16</b> | 0.034295 |
| KATNAL1   | katanin catalytic subunit A1 like 1 [Source:HGNC Symbol;Acc:HGNC:28361]                    | 17.2   | 19.7   | <b>1.16</b> | 0.006471 |
| ACTN1     | actinin alpha 1 [Source:HGNC Symbol;Acc:HGNC:163]                                          | 137.9  | 159.0  | <b>1.16</b> | 0.00157  |
| EPHA2     | EPH receptor A2 [Source:HGNC Symbol;Acc:HGNC:3386]                                         | 74.9   | 85.7   | <b>1.16</b> | 0.000242 |
| SNN       | stannin [Source:HGNC Symbol;Acc:HGNC:11149]                                                | 21.5   | 24.8   | <b>1.16</b> | 0.003974 |
| CPEB2     | cytoplasmic polyadenylation element binding protein 2 [Source:HGNC Symbol;Acc:HGNC:21745]  | 48.9   | 56.4   | <b>1.16</b> | 0.003531 |
| FLNA      | filamin A [Source:HGNC Symbol;Acc:HGNC:3754]                                               | 1264.7 | 1454.6 | <b>1.16</b> | 0.011284 |
| RBM38     | RNA binding motif protein 38 [Source:HGNC Symbol;Acc:HGNC:15818]                           | 7.1    | 8.1    | <b>1.16</b> | 0.047239 |
| ISM1      | isthmin 1 [Source:HGNC Symbol;Acc:HGNC:16213]                                              | 68.0   | 78.2   | <b>1.16</b> | 9.80E-05 |
| SEPT11    | septin 11 [Source:HGNC Symbol;Acc:HGNC:25589]                                              | 44.8   | 51.6   | <b>1.16</b> | 0.002429 |
| EPS8      | epidermal growth factor receptor pathway substrate 8 [Source:HGNC Symbol;Acc:HGNC:3420]    | 460.5  | 529.6  | <b>1.16</b> | 0.000103 |
| PHTF2     | putative homeodomain transcription factor 2 [Source:HGNC Symbol;Acc:HGNC:13411]            | 31.4   | 36.0   | <b>1.16</b> | 0.001383 |
| RAPGEF1   | Rap guanine nucleotide exchange factor 1 [Source:HGNC Symbol;Acc:HGNC:4568]                | 52.3   | 60.2   | <b>1.15</b> | 0.001904 |
| TSPAN14   | tetraspanin 14 [Source:HGNC Symbol;Acc:HGNC:23303]                                         | 11.3   | 12.9   | <b>1.15</b> | 0.027364 |
| DMPK      | dystrophia myotonica protein kinase [Source:HGNC Symbol;Acc:HGNC:2933]                     | 16.1   | 18.6   | <b>1.15</b> | 0.009818 |
| RAB11FIP5 | RAB11 family interacting protein 5 [Source:HGNC Symbol;Acc:HGNC:24845]                     | 162.1  | 186.4  | <b>1.15</b> | 4.30E-05 |
| JPT1      | Jupiter microtubule associated homolog 1 [Source:HGNC Symbol;Acc:HGNC:14569]               | 11.6   | 13.1   | <b>1.15</b> | 0.031833 |
| PTPRG     | protein tyrosine phosphatase, receptor type G [Source:HGNC Symbol;Acc:HGNC:9671]           | 38.4   | 43.5   | <b>1.15</b> | 0.040105 |
| JDP2      | Jun dimerization protein 2 [Source:HGNC Symbol;Acc:HGNC:17546]                             | 19.4   | 22.3   | <b>1.15</b> | 0.002213 |
| CMTM7     | CKLF like MARVEL transmembrane domain containing 7 [Source:HGNC Symbol;Acc:HGNC:19178]     | 25.4   | 29.0   | <b>1.15</b> | 0.015016 |
| LRRC8A    | leucine rich repeat containing 8 family member A [Source:HGNC Symbol;Acc:HGNC:19027]       | 76.1   | 87.4   | <b>1.15</b> | 0.000856 |
| FRMD4B    | FERM domain containing 4B [Source:HGNC Symbol;Acc:HGNC:24886]                              | 13.7   | 15.6   | <b>1.15</b> | 0.029453 |
| WDR47     | WD repeat domain 47 [Source:HGNC Symbol;Acc:HGNC:29141]                                    | 25.9   | 29.6   | <b>1.15</b> | 0.008    |
| VPS37B    | VPS37B, ESCRT-I subunit [Source:HGNC Symbol;Acc:HGNC:25754]                                | 78.0   | 89.0   | <b>1.15</b> | 0.002002 |
| ACKR3     | atypical chemokine receptor 3 [Source:HGNC Symbol;Acc:HGNC:23692]                          | 136.9  | 155.7  | <b>1.15</b> | 0.000829 |
| NOP56     | NOP56 ribonucleoprotein [Source:HGNC Symbol;Acc:HGNC:15911]                                | 103.8  | 118.8  | <b>1.15</b> | 0.000139 |
| GNA13     | G protein subunit alpha 13 [Source:HGNC Symbol;Acc:HGNC:4381]                              | 53.0   | 60.3   | <b>1.15</b> | 0.002425 |
| MAP7D3    | MAP7 domain containing 3 [Source:HGNC Symbol;Acc:HGNC:25742]                               | 24.6   | 28.2   | <b>1.15</b> | 0.003701 |
| SLC31A2   | solute carrier family 31 member 2 [Source:HGNC Symbol;Acc:HGNC:11017]                      | 67.2   | 76.8   | <b>1.15</b> | 0.006992 |



|          |                                                                                                      |       |        |             |          |
|----------|------------------------------------------------------------------------------------------------------|-------|--------|-------------|----------|
| NR1D1    | nuclear receptor subfamily 1 group D member 1 [Source:HGNC Symbol;Acc:HGNC:7962]                     | 198.7 | 226.5  | <b>1.15</b> | 7.90E-05 |
| HAPLN1   | hyaluronan and proteoglycan link protein 1 [Source:HGNC Symbol;Acc:HGNC:2380]                        | 631.4 | 731.7  | <b>1.15</b> | 0.000241 |
| KALRN    | kalirin, RhoGEF kinase [Source:HGNC Symbol;Acc:HGNC:4814]                                            | 24.5  | 28.2   | <b>1.15</b> | 0.033764 |
| SAMD9L   | sterile alpha motif domain containing 9 like [Source:HGNC Symbol;Acc:HGNC:1349]                      | 27.1  | 30.3   | <b>1.15</b> | 0.043662 |
| ACVR2A   | activin A receptor type 2A [Source:HGNC Symbol;Acc:HGNC:173]                                         | 13.6  | 15.6   | <b>1.15</b> | 0.017611 |
| AGAP3    | ArfGAP with GTPase domain, ankyrin repeat and PH domain 3 [Source:HGNC Symbol;Acc:HGNC:16923]        | 27.8  | 31.7   | <b>1.15</b> | 0.001897 |
| PLEKHO2  | pleckstrin homology domain containing O2 [Source:HGNC Symbol;Acc:HGNC:30026]                         | 62.3  | 71.0   | <b>1.15</b> | 0.001051 |
| C2CD2    | C2 calcium dependent domain containing 2 [Source:HGNC Symbol;Acc:HGNC:1266]                          | 20.1  | 22.9   | <b>1.15</b> | 0.005696 |
| KLF11    | Kruppel like factor 11 [Source:HGNC Symbol;Acc:HGNC:11811]                                           | 11.6  | 13.2   | <b>1.15</b> | 0.014086 |
| CEP112   | centrosomal protein 112 [Source:HGNC Symbol;Acc:HGNC:28514]                                          | 19.4  | 22.1   | <b>1.15</b> | 0.012019 |
| N4BP3    | NEDD4 binding protein 3 [Source:HGNC Symbol;Acc:HGNC:29852]                                          | 6.8   | 7.8    | <b>1.15</b> | 0.036032 |
| PICALM   | phosphatidylinositol binding clathrin assembly protein [Source:HGNC Symbol;Acc:HGNC:15514]           | 198.3 | 225.6  | <b>1.15</b> | 0.003373 |
| PRELP    | proline and arginine rich end leucine rich repeat protein [Source:HGNC Symbol;Acc:HGNC:9357]         | 909.7 | 1044.4 | <b>1.15</b> | 0.000165 |
| RASSF3   | Ras association domain family member 3 [Source:HGNC Symbol;Acc:HGNC:14271]                           | 8.0   | 9.2    | <b>1.15</b> | 0.021696 |
| CRYAB    | crystallin alpha B [Source:HGNC Symbol;Acc:HGNC:2389]                                                | 23.9  | 27.2   | <b>1.15</b> | 0.017746 |
| ELOVL1   | ELOVL fatty acid elongase 1 [Source:HGNC Symbol;Acc:HGNC:14418]                                      | 46.3  | 52.9   | <b>1.15</b> | 0.003855 |
| SWAP70   | SWAP switching B-cell complex subunit 70 [Source:HGNC Symbol;Acc:HGNC:17070]                         | 100.7 | 114.6  | <b>1.15</b> | 0.000184 |
| ACLY     | ATP citrate lyase [Source:HGNC Symbol;Acc:HGNC:115]                                                  | 132.7 | 152.9  | <b>1.15</b> | 0.013717 |
| SPATA13  | spermatogenesis associated 13 [Source:HGNC Symbol;Acc:HGNC:23222]                                    | 28.4  | 32.8   | <b>1.14</b> | 0.012793 |
| CLIC2    | chloride intracellular channel 2 [Source:HGNC Symbol;Acc:HGNC:2063]                                  | 10.4  | 12.0   | <b>1.14</b> | 0.027519 |
| TIMP4    | TIMP metalloproteinase inhibitor 4 [Source:HGNC Symbol;Acc:HGNC:11823]                               | 24.0  | 27.2   | <b>1.14</b> | 0.020417 |
| CHML     | CHM like, Rab escort protein 2 [Source:HGNC Symbol;Acc:HGNC:1941]                                    | 9.0   | 10.3   | <b>1.14</b> | 0.049128 |
| HDAC5    | histone deacetylase 5 [Source:HGNC Symbol;Acc:HGNC:14068]                                            | 49.6  | 56.5   | <b>1.14</b> | 0.000701 |
| PGM2     | phosphoglucomutase 2 [Source:HGNC Symbol;Acc:HGNC:8906]                                              | 30.7  | 34.8   | <b>1.14</b> | 0.004057 |
| EHD1     | EH domain containing 1 [Source:HGNC Symbol;Acc:HGNC:3242]                                            | 131.8 | 150.1  | <b>1.14</b> | 0.001132 |
| ADGRG1   | adhesion G protein-coupled receptor G1 [Source:HGNC Symbol;Acc:HGNC:4512]                            | 22.7  | 25.7   | <b>1.14</b> | 0.002706 |
| PPP1R13B | protein phosphatase 1 regulatory subunit 13B [Source:HGNC Symbol;Acc:HGNC:14950]                     | 21.8  | 24.8   | <b>1.14</b> | 0.022662 |
| ITPRIPL2 | inositol 1,4,5-trisphosphate receptor interacting protein like 2 [Source:HGNC Symbol;Acc:HGNC:27257] | 193.5 | 220.0  | <b>1.14</b> | 0.005055 |
| PLXNA1   | plexin A1 [Source:HGNC Symbol;Acc:HGNC:9099]                                                         | 89.9  | 102.3  | <b>1.14</b> | 0.003798 |
| FOSL1    | FOS like 1, AP-1 transcription factor subunit [Source:HGNC Symbol;Acc:HGNC:13718]                    | 343.0 | 390.4  | <b>1.14</b> | 0.001055 |
| HMGA2    | high mobility group AT-hook 2 [Source:HGNC Symbol;Acc:HGNC:5009]                                     | 21.0  | 24.4   | <b>1.14</b> | 0.026029 |
| JAK1     | Janus kinase 1 [Source:HGNC Symbol;Acc:HGNC:6190]                                                    | 189.4 | 215.4  | <b>1.14</b> | 0.001998 |
| ENG      | endoglin [Source:HGNC Symbol;Acc:HGNC:3349]                                                          | 119.6 | 136.2  | <b>1.14</b> | 0.000595 |
| FAM43A   | family with sequence similarity 43 member A [Source:HGNC Symbol;Acc:HGNC:26888]                      | 40.0  | 45.2   | <b>1.14</b> | 0.003974 |
| ABCB9    | ATP binding cassette subfamily B member 9 [Source:HGNC Symbol;Acc:HGNC:50]                           | 75.8  | 85.5   | <b>1.14</b> | 0.007511 |
| ARRDC4   | arrestin domain containing 4 [Source:HGNC Symbol;Acc:HGNC:28087]                                     | 44.2  | 50.5   | <b>1.14</b> | 0.001241 |
| GULP1    | GULP, engulfment adaptor PTB domain containing 1 [Source:HGNC Symbol;Acc:HGNC:18649]                 | 44.7  | 51.8   | <b>1.14</b> | 0.018221 |
| NEMP1    | nuclear envelope integral membrane protein 1 [Source:HGNC Symbol;Acc:HGNC:29001]                     | 23.0  | 26.1   | <b>1.14</b> | 0.015545 |
| STK10    | serine/threonine kinase 10 [Source:HGNC Symbol;Acc:HGNC:11388]                                       | 50.3  | 57.1   | <b>1.14</b> | 0.000848 |

|          |                                                                                                   |       |       |             |          |
|----------|---------------------------------------------------------------------------------------------------|-------|-------|-------------|----------|
| PLA2G15  | phospholipase A2 group XV [Source:HGNC Symbol;Acc:HGNC:17163]                                     | 18.3  | 20.8  | <b>1.14</b> | 0.005527 |
| ERG      | ERG, ETS transcription factor [Source:HGNC Symbol;Acc:HGNC:3446]                                  | 12.6  | 14.4  | <b>1.14</b> | 0.012531 |
| TCF4     | transcription factor 4 [Source:HGNC Symbol;Acc:HGNC:11634]                                        | 42.9  | 48.6  | <b>1.14</b> | 0.002945 |
| C15orf39 | chromosome 15 open reading frame 39 [Source:HGNC Symbol;Acc:HGNC:24497]                           | 27.9  | 31.8  | <b>1.14</b> | 0.003486 |
| TAF9B    | TATA-box binding protein associated factor 9b [Source:HGNC Symbol;Acc:HGNC:17306]                 | 8.4   | 9.6   | <b>1.14</b> | 0.049128 |
| MMP10    | matrix metalloproteinase 10 [Source:HGNC Symbol;Acc:HGNC:7156]                                    | 24.8  | 28.6  | <b>1.14</b> | 0.007024 |
| SLC41A2  | solute carrier family 41 member 2 [Source:HGNC Symbol;Acc:HGNC:31045]                             | 42.0  | 47.6  | <b>1.14</b> | 0.003864 |
| STK26    | serine/threonine kinase 26 [Source:HGNC Symbol;Acc:HGNC:18174]                                    | 40.7  | 46.1  | <b>1.14</b> | 0.025769 |
| VCL      | vinculin [Source:HGNC Symbol;Acc:HGNC:12665]                                                      | 81.2  | 91.7  | <b>1.14</b> | 0.022188 |
| WLS      | wntless Wnt ligand secretion mediator [Source:HGNC Symbol;Acc:HGNC:30238]                         | 26.0  | 29.6  | <b>1.14</b> | 0.001333 |
| SLC9A3R2 | SLC9A3 regulator 2 [Source:HGNC Symbol;Acc:HGNC:11076]                                            | 65.4  | 75.8  | <b>1.14</b> | 0.027996 |
| RAP2A    | RAP2A, member of RAS oncogene family [Source:HGNC Symbol;Acc:HGNC:9861]                           | 23.2  | 26.3  | <b>1.14</b> | 0.006554 |
| HEXIM1   | hexamethylene bisacetamide inducible 1 [Source:HGNC Symbol;Acc:HGNC:24953]                        | 92.5  | 104.8 | <b>1.14</b> | 0.001079 |
| GPRC5B   | G protein-coupled receptor class C group 5 member B [Source:HGNC Symbol;Acc:HGNC:13308]           | 12.2  | 13.7  | <b>1.14</b> | 0.033576 |
| DNAJB1   | DnaJ heat shock protein family (Hsp40) member B1 [Source:HGNC Symbol;Acc:HGNC:5270]               | 88.0  | 100.0 | <b>1.14</b> | 0.002238 |
| PRKCD    | protein kinase C delta [Source:HGNC Symbol;Acc:HGNC:9399]                                         | 20.0  | 22.5  | <b>1.14</b> | 0.01009  |
| HSPB8    | heat shock protein family B (small) member 8 [Source:HGNC Symbol;Acc:HGNC:30171]                  | 40.0  | 45.3  | <b>1.14</b> | 0.005094 |
| SUN1     | Sad1 and UNC84 domain containing 1 [Source:HGNC Symbol;Acc:HGNC:18587]                            | 132.4 | 150.2 | <b>1.14</b> | 0.008242 |
| AUTS2    | AUTS2, activator of transcription and developmental regulator [Source:HGNC Symbol;Acc:HGNC:14262] | 94.2  | 106.5 | <b>1.14</b> | 0.013094 |
| PITPNB   | phosphatidylinositol transfer protein beta [Source:HGNC Symbol;Acc:HGNC:9002]                     | 55.0  | 62.3  | <b>1.14</b> | 0.000949 |
| RAP2B    | RAP2B, member of RAS oncogene family [Source:HGNC Symbol;Acc:HGNC:9862]                           | 15.0  | 17.0  | <b>1.14</b> | 0.022753 |
| GLS      | glutaminase [Source:HGNC Symbol;Acc:HGNC:4331]                                                    | 85.9  | 96.7  | <b>1.14</b> | 0.003974 |
| HSPA2    | heat shock protein family A (Hsp70) member 2 [Source:HGNC Symbol;Acc:HGNC:5235]                   | 44.3  | 50.2  | <b>1.14</b> | 0.002252 |
| ANKRD10  | ankyrin repeat domain 10 [Source:HGNC Symbol;Acc:HGNC:20265]                                      | 60.1  | 68.7  | <b>1.14</b> | 0.016699 |
| ASAP2    | ArfGAP with SH3 domain, ankyrin repeat and PH domain 2 [Source:HGNC Symbol;Acc:HGNC:2721]         | 75.7  | 85.3  | <b>1.14</b> | 0.041791 |
| INPP5A   | inositol polyphosphate-5-phosphatase A [Source:HGNC Symbol;Acc:HGNC:6076]                         | 12.7  | 14.3  | <b>1.13</b> | 0.014373 |
| FADS3    | fatty acid desaturase 3 [Source:HGNC Symbol;Acc:HGNC:3576]                                        | 58.9  | 66.5  | <b>1.13</b> | 0.011842 |
| B3GNT2   | UDP-GlcNAc:betaGal beta-1,3-N-acetylglucosaminyltransferase 2 [Source:HGNC Symbol;Acc:HGNC:15629] | 21.5  | 24.2  | <b>1.13</b> | 0.00452  |
| CPA4     | carboxypeptidase A4 [Source:HGNC Symbol;Acc:HGNC:15740]                                           | 96.1  | 106.4 | <b>1.13</b> | 0.009313 |
| CUL4A    | cullin 4A [Source:HGNC Symbol;Acc:HGNC:2554]                                                      | 55.7  | 62.9  | <b>1.13</b> | 0.001412 |
| STK39    | serine/threonine kinase 39 [Source:HGNC Symbol;Acc:HGNC:17717]                                    | 18.6  | 21.0  | <b>1.13</b> | 0.004057 |
| FAM102A  | family with sequence similarity 102 member A [Source:HGNC Symbol;Acc:HGNC:31419]                  | 23.9  | 27.0  | <b>1.13</b> | 0.005596 |
| ZCCHC24  | zinc finger CCHC-type containing 24 [Source:HGNC Symbol;Acc:HGNC:26911]                           | 30.9  | 35.0  | <b>1.13</b> | 0.002134 |
| CTBP2    | C-terminal binding protein 2 [Source:HGNC Symbol;Acc:HGNC:2495]                                   | 33.8  | 38.1  | <b>1.13</b> | 0.001692 |
| THBS1    | thrombospondin 1 [Source:HGNC Symbol;Acc:HGNC:11785]                                              | 344.2 | 391.4 | <b>1.13</b> | 0.036084 |
| AP1S2    | adaptor related protein complex 1 sigma 2 subunit [Source:HGNC Symbol;Acc:HGNC:560]               | 19.4  | 21.8  | <b>1.13</b> | 0.007144 |
| FGD5     | FYVE, RhoGEF and PH domain containing 5 [Source:HGNC Symbol;Acc:HGNC:19117]                       | 35.5  | 39.8  | <b>1.13</b> | 0.015295 |
| CCNYL1   | cyclin Y like 1 [Source:HGNC Symbol;Acc:HGNC:26868]                                               | 29.0  | 32.7  | <b>1.13</b> | 0.005407 |
| INF2     | inverted formin, FH2 and WH2 domain containing [Source:HGNC Symbol;Acc:HGNC:23791]                | 146.7 | 165.3 | <b>1.13</b> | 0.001897 |

|          |                                                                                                |        |        |             |          |
|----------|------------------------------------------------------------------------------------------------|--------|--------|-------------|----------|
| RECK     | reversion inducing cysteine rich protein with kazal motifs [Source:HGNC Symbol;Acc:HGNC:11345] | 24.6   | 27.7   | <b>1.13</b> | 0.011386 |
| ZNF703   | zinc finger protein 703 [Source:HGNC Symbol;Acc:HGNC:25883]                                    | 30.2   | 33.9   | <b>1.13</b> | 0.007926 |
| CYB5R2   | cytochrome b5 reductase 2 [Source:HGNC Symbol;Acc:HGNC:24376]                                  | 42.2   | 47.3   | <b>1.13</b> | 0.015048 |
| RAP1A    | RAP1A, member of RAS oncogene family [Source:HGNC Symbol;Acc:HGNC:9855]                        | 66.2   | 74.2   | <b>1.13</b> | 0.011386 |
| DDIT4L   | DNA damage inducible transcript 4 like [Source:HGNC Symbol;Acc:HGNC:30555]                     | 88.4   | 100.6  | <b>1.13</b> | 0.003928 |
| FNDC1    | fibronectin type III domain containing 1 [Source:HGNC Symbol;Acc:HGNC:21184]                   | 115.7  | 129.8  | <b>1.13</b> | 0.025998 |
| CAB39    | calcium binding protein 39 [Source:HGNC Symbol;Acc:HGNC:20292]                                 | 91.2   | 102.8  | <b>1.13</b> | 0.002452 |
| PEA15    | phosphoprotein enriched in astrocytes 15 [Source:HGNC Symbol;Acc:HGNC:8822]                    | 141.9  | 159.7  | <b>1.13</b> | 0.001875 |
| RIPOR1   | RHO family interacting cell polarization regulator 1 [Source:HGNC Symbol;Acc:HGNC:25836]       | 41.8   | 46.9   | <b>1.13</b> | 0.003351 |
| TMBIM1   | transmembrane BAX inhibitor motif containing 1 [Source:HGNC Symbol;Acc:HGNC:23410]             | 240.5  | 270.0  | <b>1.13</b> | 0.006614 |
| CDC42SE1 | CDC42 small effector 1 [Source:HGNC Symbol;Acc:HGNC:17719]                                     | 170.5  | 191.5  | <b>1.13</b> | 0.002992 |
| DDX58    | DEXD/H-box helicase 58 [Source:HGNC Symbol;Acc:HGNC:19102]                                     | 25.7   | 28.9   | <b>1.13</b> | 0.01262  |
| SSBP3    | single stranded DNA binding protein 3 [Source:HGNC Symbol;Acc:HGNC:15674]                      | 23.1   | 25.9   | <b>1.13</b> | 0.012019 |
| ATP2B1   | ATPase plasma membrane Ca <sup>2+</sup> transporting 1 [Source:HGNC Symbol;Acc:HGNC:814]       | 602.5  | 674.7  | <b>1.13</b> | 0.002084 |
| WDR1     | WD repeat domain 1 [Source:HGNC Symbol;Acc:HGNC:12754]                                         | 254.8  | 287.3  | <b>1.13</b> | 0.001481 |
| ZNFX1    | zinc finger NFX1-type containing 1 [Source:HGNC Symbol;Acc:HGNC:29271]                         | 159.4  | 178.0  | <b>1.13</b> | 0.04069  |
| CD55     | CD55 molecule (Cromer blood group) [Source:HGNC Symbol;Acc:HGNC:2665]                          | 2040.8 | 2277.2 | <b>1.13</b> | 0.000188 |
| LPIN1    | lipin 1 [Source:HGNC Symbol;Acc:HGNC:13345]                                                    | 40.2   | 45.2   | <b>1.13</b> | 0.016574 |
| FOXP4    | forkhead box P4 [Source:HGNC Symbol;Acc:HGNC:20842]                                            | 47.8   | 53.6   | <b>1.13</b> | 0.003085 |
| UCK2     | uridine-cytidine kinase 2 [Source:HGNC Symbol;Acc:HGNC:12562]                                  | 17.7   | 20.0   | <b>1.13</b> | 0.014086 |
| RAI14    | retinoic acid induced 14 [Source:HGNC Symbol;Acc:HGNC:14873]                                   | 47.9   | 54.0   | <b>1.13</b> | 0.019034 |
| NIPAL3   | NIPA like domain containing 3 [Source:HGNC Symbol;Acc:HGNC:25233]                              | 26.6   | 29.6   | <b>1.13</b> | 0.022826 |
| TBC1D12  | TBC1 domain family member 12 [Source:HGNC Symbol;Acc:HGNC:29082]                               | 15.5   | 17.3   | <b>1.13</b> | 0.012101 |
| OSBPL9   | oxysterol binding protein like 9 [Source:HGNC Symbol;Acc:HGNC:16386]                           | 29.2   | 32.6   | <b>1.12</b> | 0.017175 |
| GLRX2    | glutaredoxin 2 [Source:HGNC Symbol;Acc:HGNC:16065]                                             | 23.1   | 25.8   | <b>1.12</b> | 0.03237  |
| KLF10    | Kruppel like factor 10 [Source:HGNC Symbol;Acc:HGNC:11810]                                     | 67.7   | 75.7   | <b>1.12</b> | 0.003124 |
| SPATS2L  | spermatogenesis associated serine rich 2 like [Source:HGNC Symbol;Acc:HGNC:24574]              | 47.0   | 52.7   | <b>1.12</b> | 0.008246 |
| SVIL-AS1 | SVIL antisense RNA 1 [Source:HGNC Symbol;Acc:HGNC:51219]                                       | 24.7   | 27.7   | <b>1.12</b> | 0.026579 |
| GCNT1    | glucosaminyl (N-acetyl) transferase 1, core 2 [Source:HGNC Symbol;Acc:HGNC:4203]               | 35.2   | 39.5   | <b>1.12</b> | 0.00507  |
| ABHD3    | abhydrolase domain containing 3 [Source:HGNC Symbol;Acc:HGNC:18718]                            | 11.7   | 13.1   | <b>1.12</b> | 0.031474 |
| YPEL2    | yippee like 2 [Source:HGNC Symbol;Acc:HGNC:18326]                                              | 18.8   | 21.1   | <b>1.12</b> | 0.015531 |
| SLC8B1   | solute carrier family 8 member B1 [Source:HGNC Symbol;Acc:HGNC:26175]                          | 36.6   | 40.8   | <b>1.12</b> | 0.012793 |
| NKX3-1   | NK3 homeobox 1 [Source:HGNC Symbol;Acc:HGNC:7838]                                              | 170.2  | 190.6  | <b>1.12</b> | 0.00223  |
| MAPKBP1  | mitogen-activated protein kinase binding protein 1 [Source:HGNC Symbol;Acc:HGNC:29536]         | 46.7   | 52.1   | <b>1.12</b> | 0.026822 |
| BACE1    | beta-secretase 1 [Source:HGNC Symbol;Acc:HGNC:933]                                             | 25.2   | 28.2   | <b>1.12</b> | 0.040092 |
| COL8A2   | collagen type VIII alpha 2 chain [Source:HGNC Symbol;Acc:HGNC:2216]                            | 79.5   | 89.1   | <b>1.12</b> | 0.003118 |
| ABHD2    | abhydrolase domain containing 2 [Source:HGNC Symbol;Acc:HGNC:18717]                            | 263.2  | 291.6  | <b>1.12</b> | 0.046516 |
| DLGAP4   | DLG associated protein 4 [Source:HGNC Symbol;Acc:HGNC:24476]                                   | 146.6  | 164.1  | <b>1.12</b> | 0.00507  |
| GXYLT1   | glucoside xylosyltransferase 1 [Source:HGNC Symbol;Acc:HGNC:27482]                             | 37.5   | 42.1   | <b>1.12</b> | 0.023883 |

|          |                                                                                                      |        |        |             |          |
|----------|------------------------------------------------------------------------------------------------------|--------|--------|-------------|----------|
| AGFG2    | ArfGAP with FG repeats 2 [Source:HGNC Symbol;Acc:HGNC:5177]                                          | 41.7   | 46.5   | <b>1.12</b> | 0.016083 |
| LRRFIP1  | LRR binding FLII interacting protein 1 [Source:HGNC Symbol;Acc:HGNC:6702]                            | 155.1  | 173.6  | <b>1.12</b> | 0.011709 |
| SEMA3E   | semaphorin 3E [Source:HGNC Symbol;Acc:HGNC:10727]                                                    | 19.1   | 21.3   | <b>1.12</b> | 0.046504 |
| KIAA0040 | KIAA0040 [Source:HGNC Symbol;Acc:HGNC:28950]                                                         | 80.1   | 89.5   | <b>1.12</b> | 0.017136 |
| CSK      | CSK, non-receptor tyrosine kinase [Source:HGNC Symbol;Acc:HGNC:2444]                                 | 59.6   | 66.7   | <b>1.12</b> | 0.004413 |
| PNP      | purine nucleoside phosphorylase [Source:HGNC Symbol;Acc:HGNC:7892]                                   | 89.1   | 100.8  | <b>1.12</b> | 0.018521 |
| ZBTB46   | zinc finger and BTB domain containing 46 [Source:HGNC Symbol;Acc:HGNC:16094]                         | 13.7   | 15.3   | <b>1.12</b> | 0.035041 |
| POLG     | DNA polymerase gamma, catalytic subunit [Source:HGNC Symbol;Acc:HGNC:9179]                           | 64.3   | 71.9   | <b>1.12</b> | 0.00507  |
| NDRG1    | N-myc downstream regulated 1 [Source:HGNC Symbol;Acc:HGNC:7679]                                      | 1050.7 | 1173.8 | <b>1.12</b> | 0.004711 |
| TUBA1B   | tubulin alpha 1b [Source:HGNC Symbol;Acc:HGNC:18809]                                                 | 131.4  | 146.7  | <b>1.12</b> | 0.009047 |
| RRAS2    | related RAS viral (r-ras) oncogene homolog 2 [Source:HGNC Symbol;Acc:HGNC:17271]                     | 35.5   | 39.5   | <b>1.12</b> | 0.030575 |
| CHAC1    | ChaC glutathione specific gamma-glutamylcyclotransferase 1 [Source:HGNC Symbol;Acc:HGNC:28680]       | 32.9   | 36.8   | <b>1.12</b> | 0.016368 |
| ATP1B1   | ATPase Na <sup>+</sup> /K <sup>+</sup> transporting subunit beta 1 [Source:HGNC Symbol;Acc:HGNC:804] | 342.2  | 379.5  | <b>1.12</b> | 0.00503  |
| TLDC1    | TBC/LysM-associated domain containing 1 [Source:HGNC Symbol;Acc:HGNC:29325]                          | 21.9   | 24.3   | <b>1.12</b> | 0.038131 |
| BCL10    | B-cell CLL/lymphoma 10 [Source:HGNC Symbol;Acc:HGNC:989]                                             | 38.0   | 42.4   | <b>1.12</b> | 0.037017 |
| BAMBI    | BMP and activin membrane bound inhibitor [Source:HGNC Symbol;Acc:HGNC:30251]                         | 44.7   | 49.8   | <b>1.12</b> | 0.005198 |
| CDC42EP4 | CDC42 effector protein 4 [Source:HGNC Symbol;Acc:HGNC:17147]                                         | 32.9   | 36.6   | <b>1.12</b> | 0.016826 |
| RAB35    | RAB35, member RAS oncogene family [Source:HGNC Symbol;Acc:HGNC:9774]                                 | 53.0   | 59.2   | <b>1.12</b> | 0.004153 |
| PPARD    | peroxisome proliferator activated receptor delta [Source:HGNC Symbol;Acc:HGNC:9235]                  | 50.0   | 55.8   | <b>1.12</b> | 0.00386  |
| MAP3K3   | mitogen-activated protein kinase kinase kinase 3 [Source:HGNC Symbol;Acc:HGNC:6855]                  | 45.4   | 50.6   | <b>1.12</b> | 0.016196 |
| CPT1A    | carnitine palmitoyltransferase 1A [Source:HGNC Symbol;Acc:HGNC:2328]                                 | 22.4   | 24.9   | <b>1.12</b> | 0.042557 |
| CCDC127  | coiled-coil domain containing 127 [Source:HGNC Symbol;Acc:HGNC:30520]                                | 37.8   | 42.1   | <b>1.12</b> | 0.020411 |
| MSN      | moesin [Source:HGNC Symbol;Acc:HGNC:7373]                                                            | 497.2  | 556.8  | <b>1.12</b> | 0.032727 |
| STAT5A   | signal transducer and activator of transcription 5A [Source:HGNC Symbol;Acc:HGNC:11366]              | 35.4   | 39.5   | <b>1.12</b> | 0.006377 |
| MSRB3    | methionine sulfoxide reductase B3 [Source:HGNC Symbol;Acc:HGNC:27375]                                | 34.7   | 38.5   | <b>1.12</b> | 0.027495 |
| GIT1     | GIT ArfGAP 1 [Source:HGNC Symbol;Acc:HGNC:4272]                                                      | 26.3   | 29.3   | <b>1.12</b> | 0.008046 |
| EHD2     | EH domain containing 2 [Source:HGNC Symbol;Acc:HGNC:3243]                                            | 235.7  | 263.8  | <b>1.12</b> | 0.004069 |
| MYO1D    | myosin ID [Source:HGNC Symbol;Acc:HGNC:7598]                                                         | 169.9  | 189.1  | <b>1.12</b> | 0.021083 |
| SH2D4A   | SH2 domain containing 4A [Source:HGNC Symbol;Acc:HGNC:26102]                                         | 40.0   | 44.5   | <b>1.12</b> | 0.005894 |
| TMX4     | thioredoxin related transmembrane protein 4 [Source:HGNC Symbol;Acc:HGNC:25237]                      | 186.6  | 208.4  | <b>1.12</b> | 0.039846 |
| MAT2A    | methionine adenosyltransferase 2A [Source:HGNC Symbol;Acc:HGNC:6904]                                 | 191.3  | 213.7  | <b>1.12</b> | 0.022691 |
| PLCD3    | phospholipase C delta 3 [Source:HGNC Symbol;Acc:HGNC:9061]                                           | 27.4   | 30.5   | <b>1.12</b> | 0.02659  |
| CORO1C   | coronin 1C [Source:HGNC Symbol;Acc:HGNC:2254]                                                        | 60.1   | 66.5   | <b>1.12</b> | 0.034257 |
| GIPC1    | GIPC PDZ domain containing family member 1 [Source:HGNC Symbol;Acc:HGNC:1226]                        | 31.7   | 35.4   | <b>1.12</b> | 0.045173 |
| BAZ1A    | bromodomain adjacent to zinc finger domain 1A [Source:HGNC Symbol;Acc:HGNC:960]                      | 35.0   | 38.7   | <b>1.12</b> | 0.044841 |
| MXD4     | MAX dimerization protein 4 [Source:HGNC Symbol;Acc:HGNC:13906]                                       | 44.7   | 49.5   | <b>1.11</b> | 0.021487 |
| SMURF1   | SMAD specific E3 ubiquitin protein ligase 1 [Source:HGNC Symbol;Acc:HGNC:16807]                      | 45.6   | 50.5   | <b>1.11</b> | 0.023846 |
| CYLD     | CYLD lysine 63 deubiquitinase [Source:HGNC Symbol;Acc:HGNC:2584]                                     | 195.7  | 217.8  | <b>1.11</b> | 0.013515 |
| SLC43A3  | solute carrier family 43 member 3 [Source:HGNC Symbol;Acc:HGNC:17466]                                | 112.4  | 125.0  | <b>1.11</b> | 0.044038 |



|           |                                                                                                |        |        |             |          |
|-----------|------------------------------------------------------------------------------------------------|--------|--------|-------------|----------|
| ESRRA     | estrogen related receptor alpha [Source:HGNC Symbol;Acc:HGNC:3471]                             | 21.6   | 23.9   | <b>1.11</b> | 0.044775 |
| TNPO1     | transportin 1 [Source:HGNC Symbol;Acc:HGNC:6401]                                               | 139.8  | 153.5  | <b>1.11</b> | 0.033682 |
| INSIG1    | insulin induced gene 1 [Source:HGNC Symbol;Acc:HGNC:6083]                                      | 170.7  | 189.9  | <b>1.11</b> | 0.009745 |
| SCRN1     | secernin 1 [Source:HGNC Symbol;Acc:HGNC:22192]                                                 | 61.2   | 67.4   | <b>1.11</b> | 0.010891 |
| FYTTD1    | forty-two-three domain containing 1 [Source:HGNC Symbol;Acc:HGNC:25407]                        | 61.5   | 68.1   | <b>1.11</b> | 0.005777 |
| CAV1      | caveolin 1 [Source:HGNC Symbol;Acc:HGNC:1527]                                                  | 662.7  | 734.5  | <b>1.11</b> | 0.008602 |
| ANXA11    | annexin A11 [Source:HGNC Symbol;Acc:HGNC:535]                                                  | 148.4  | 164.9  | <b>1.11</b> | 0.008782 |
| SIPA1     | signal-induced proliferation-associated 1 [Source:HGNC Symbol;Acc:HGNC:10885]                  | 18.9   | 21.0   | <b>1.11</b> | 0.033576 |
| PPP2R5A   | protein phosphatase 2 regulatory subunit B'alpha [Source:HGNC Symbol;Acc:HGNC:9309]            | 37.0   | 41.0   | <b>1.11</b> | 0.009486 |
| PKNOX1    | PBX/knotted 1 homeobox 1 [Source:HGNC Symbol;Acc:HGNC:9022]                                    | 16.7   | 18.4   | <b>1.11</b> | 0.033909 |
| ANXA2     | annexin A2 [Source:HGNC Symbol;Acc:HGNC:537]                                                   | 656.8  | 726.5  | <b>1.11</b> | 0.010522 |
| STX7      | syntaxin 7 [Source:HGNC Symbol;Acc:HGNC:11442]                                                 | 47.2   | 52.3   | <b>1.11</b> | 0.007897 |
| CTDSPL    | CTD small phosphatase like [Source:HGNC Symbol;Acc:HGNC:16890]                                 | 31.4   | 34.9   | <b>1.11</b> | 0.010838 |
| CPAMD8    | C3 and PZP like, alpha-2-macroglobulin domain containing 8 [Source:HGNC Symbol;Acc:HGNC:23228] | 111.3  | 123.9  | <b>1.11</b> | 0.009533 |
| TAGLN2    | transgelin 2 [Source:HGNC Symbol;Acc:HGNC:11554]                                               | 224.9  | 249.2  | <b>1.11</b> | 0.043992 |
| ANO10     | anoctamin 10 [Source:HGNC Symbol;Acc:HGNC:25519]                                               | 52.8   | 58.6   | <b>1.11</b> | 0.014038 |
| UXS1      | UDP-glucuronate decarboxylase 1 [Source:HGNC Symbol;Acc:HGNC:17729]                            | 92.1   | 101.3  | <b>1.11</b> | 0.020686 |
| ACTR3     | ARP3 actin related protein 3 homolog [Source:HGNC Symbol;Acc:HGNC:170]                         | 207.9  | 230.0  | <b>1.11</b> | 0.016792 |
| CSRNP2    | cysteine and serine rich nuclear protein 2 [Source:HGNC Symbol;Acc:HGNC:16006]                 | 40.4   | 44.6   | <b>1.11</b> | 0.026509 |
| IDH3A     | isocitrate dehydrogenase 3 (NAD(+)) alpha [Source:HGNC Symbol;Acc:HGNC:5384]                   | 30.4   | 33.6   | <b>1.11</b> | 0.018663 |
| ARHGEF40  | Rho guanine nucleotide exchange factor 40 [Source:HGNC Symbol;Acc:HGNC:25516]                  | 84.4   | 93.2   | <b>1.11</b> | 0.007947 |
| TNFRSF11B | TNF receptor superfamily member 11b [Source:HGNC Symbol;Acc:HGNC:11909]                        | 4350.9 | 4832.2 | <b>1.11</b> | 0.004264 |
| CLIC4     | chloride intracellular channel 4 [Source:HGNC Symbol;Acc:HGNC:13518]                           | 866.0  | 955.2  | <b>1.11</b> | 0.022797 |
| TMEM47    | transmembrane protein 47 [Source:HGNC Symbol;Acc:HGNC:18515]                                   | 109.3  | 120.2  | <b>1.11</b> | 0.045173 |
| EHBP1L1   | EH domain binding protein 1 like 1 [Source:HGNC Symbol;Acc:HGNC:30682]                         | 106.5  | 117.4  | <b>1.11</b> | 0.026589 |
| CLDN12    | claudin 12 [Source:HGNC Symbol;Acc:HGNC:2034]                                                  | 85.0   | 93.9   | <b>1.11</b> | 0.025034 |
| PNRC2     | proline rich nuclear receptor coactivator 2 [Source:HGNC Symbol;Acc:HGNC:23158]                | 109.2  | 120.3  | <b>1.11</b> | 0.017781 |
| FAM53C    | family with sequence similarity 53 member C [Source:HGNC Symbol;Acc:HGNC:1336]                 | 41.4   | 45.6   | <b>1.11</b> | 0.047949 |
| FYN       | FYN proto-oncogene, Src family tyrosine kinase [Source:HGNC Symbol;Acc:HGNC:4037]              | 31.3   | 34.4   | <b>1.11</b> | 0.044841 |
| LASP1     | LIM and SH3 protein 1 [Source:HGNC Symbol;Acc:HGNC:6513]                                       | 109.6  | 121.4  | <b>1.11</b> | 0.019366 |
| RARG      | retinoic acid receptor gamma [Source:HGNC Symbol;Acc:HGNC:9866]                                | 123.0  | 135.1  | <b>1.11</b> | 0.016083 |
| FGFBP2    | fibroblast growth factor binding protein 2 [Source:HGNC Symbol;Acc:HGNC:29451]                 | 1001.9 | 1094.9 | <b>1.10</b> | 0.024258 |
| TIMP2     | TIMP metalloproteinase inhibitor 2 [Source:HGNC Symbol;Acc:HGNC:11821]                         | 387.9  | 423.2  | <b>1.10</b> | 0.016083 |
| COTL1     | coactosin like F-actin binding protein 1 [Source:HGNC Symbol;Acc:HGNC:18304]                   | 97.1   | 106.2  | <b>1.10</b> | 0.045217 |
| RAP1B     | RAP1B, member of RAS oncogene family [Source:HGNC Symbol;Acc:HGNC:9857]                        | 58.6   | 64.5   | <b>1.10</b> | 0.036966 |
| PARM1     | prostate androgen-regulated mucin-like protein 1 [Source:HGNC Symbol;Acc:HGNC:24536]           | 107.7  | 117.2  | <b>1.10</b> | 0.027364 |
| SLC6A8    | solute carrier family 6 member 8 [Source:HGNC Symbol;Acc:HGNC:11055]                           | 97.7   | 107.1  | <b>1.10</b> | 0.023471 |
| PIEZO1    | piezo type mechanosensitive ion channel component 1 [Source:HGNC Symbol;Acc:HGNC:28993]        | 731.2  | 802.1  | <b>1.10</b> | 0.028085 |
| KCNMA1    | potassium calcium-activated channel subfamily M alpha 1 [Source:HGNC Symbol;Acc:HGNC:6284]     | 313.3  | 343.5  | <b>1.10</b> | 0.018574 |

|          |                                                                                                                 |       |       |             |          |
|----------|-----------------------------------------------------------------------------------------------------------------|-------|-------|-------------|----------|
| EPS8L2   | EPS8 like 2 [Source:HGNC Symbol;Acc:HGNC:21296]                                                                 | 150.7 | 165.7 | <b>1.10</b> | 0.021377 |
| SERPINB1 | serpin family B member 1 [Source:HGNC Symbol;Acc:HGNC:3311]                                                     | 51.4  | 56.5  | <b>1.10</b> | 0.021731 |
| NTN1     | netrin 1 [Source:HGNC Symbol;Acc:HGNC:8029]                                                                     | 165.6 | 181.6 | <b>1.10</b> | 0.01673  |
| CYBRD1   | cytochrome b reductase 1 [Source:HGNC Symbol;Acc:HGNC:20797]                                                    | 144.8 | 159.3 | <b>1.10</b> | 0.022678 |
| SMAD3    | SMAD family member 3 [Source:HGNC Symbol;Acc:HGNC:6769]                                                         | 129.2 | 139.6 | <b>1.10</b> | 0.04679  |
| TCIRG1   | T-cell immune regulator 1, ATPase H <sup>+</sup> transporting V0 subunit a3 [Source:HGNC Symbol;Acc:HGNC:11647] | 32.2  | 35.3  | <b>1.10</b> | 0.039114 |
| RAP1GAP2 | RAP1 GTPase activating protein 2 [Source:HGNC Symbol;Acc:HGNC:29176]                                            | 40.7  | 44.7  | <b>1.10</b> | 0.048203 |
| SOCS5    | suppressor of cytokine signaling 5 [Source:HGNC Symbol;Acc:HGNC:16852]                                          | 57.4  | 62.7  | <b>1.10</b> | 0.031826 |
| STX11    | syntaxin 11 [Source:HGNC Symbol;Acc:HGNC:11429]                                                                 | 24.7  | 27.2  | <b>1.10</b> | 0.043321 |
| SUN2     | Sad1 and UNC84 domain containing 2 [Source:HGNC Symbol;Acc:HGNC:14210]                                          | 185.5 | 203.4 | <b>1.10</b> | 0.031565 |
| TOB1     | transducer of ERBB2, 1 [Source:HGNC Symbol;Acc:HGNC:11979]                                                      | 61.0  | 66.9  | <b>1.10</b> | 0.032939 |
| CD276    | CD276 molecule [Source:HGNC Symbol;Acc:HGNC:19137]                                                              | 96.8  | 106.1 | <b>1.10</b> | 0.023553 |
| RHBDF1   | rhomboid 5 homolog 1 [Source:HGNC Symbol;Acc:HGNC:20561]                                                        | 41.0  | 45.0  | <b>1.10</b> | 0.028405 |
| ZFAND5   | zinc finger AN1-type containing 5 [Source:HGNC Symbol;Acc:HGNC:13008]                                           | 205.1 | 225.2 | <b>1.10</b> | 0.01907  |
| EIF4EBP2 | eukaryotic translation initiation factor 4E binding protein 2 [Source:HGNC Symbol;Acc:HGNC:3289]                | 128.5 | 140.7 | <b>1.10</b> | 0.034019 |
| ITGB5    | integrin subunit beta 5 [Source:HGNC Symbol;Acc:HGNC:6160]                                                      | 866.8 | 948.6 | <b>1.10</b> | 0.008879 |
| COLGALT1 | collagen beta(1-O)galactosyltransferase 1 [Source:HGNC Symbol;Acc:HGNC:26182]                                   | 99.0  | 108.7 | <b>1.10</b> | 0.037505 |
| IPO13    | importin 13 [Source:HGNC Symbol;Acc:HGNC:16853]                                                                 | 28.3  | 30.9  | <b>1.10</b> | 0.028131 |
| DHCR24   | 24-dehydrocholesterol reductase [Source:HGNC Symbol;Acc:HGNC:2859]                                              | 66.8  | 73.4  | <b>1.10</b> | 0.047115 |
| BHLHE40  | basic helix-loop-helix family member e40 [Source:HGNC Symbol;Acc:HGNC:1046]                                     | 196.1 | 214.3 | <b>1.10</b> | 0.038458 |
| RNF19B   | ring finger protein 19B [Source:HGNC Symbol;Acc:HGNC:26886]                                                     | 151.8 | 164.5 | <b>1.10</b> | 0.042528 |
| PLXNB2   | plexin B2 [Source:HGNC Symbol;Acc:HGNC:9104]                                                                    | 356.3 | 387.8 | <b>1.09</b> | 0.033995 |
| CDV3     | CDV3 homolog [Source:HGNC Symbol;Acc:HGNC:26928]                                                                | 152.5 | 166.4 | <b>1.09</b> | 0.038602 |
| NCK2     | NCK adaptor protein 2 [Source:HGNC Symbol;Acc:HGNC:7665]                                                        | 88.2  | 96.3  | <b>1.09</b> | 0.047115 |
| CALM1    | calmodulin 1 [Source:HGNC Symbol;Acc:HGNC:1442]                                                                 | 236.0 | 256.1 | <b>1.09</b> | 0.04234  |
| HK1      | hexokinase 1 [Source:HGNC Symbol;Acc:HGNC:4922]                                                                 | 189.2 | 205.8 | <b>1.09</b> | 0.04497  |
| SMAD7    | SMAD family member 7 [Source:HGNC Symbol;Acc:HGNC:6773]                                                         | 70.9  | 77.3  | <b>1.09</b> | 0.03485  |
| ABI1     | abl interactor 1 [Source:HGNC Symbol;Acc:HGNC:11320]                                                            | 85.3  | 93.0  | <b>1.09</b> | 0.044617 |
| RTN4     | reticulon 4 [Source:HGNC Symbol;Acc:HGNC:14085]                                                                 | 641.1 | 699.0 | <b>1.09</b> | 0.030882 |

Mean = trimmed mean of M-values (TMM) normalized counts

adj. p = FDR-adjusted p-value
