# Supplementary material for: Effects of ibuprofen on gene expression in chondrocytes from patients with osteoarthritis as determined by RNA-Seq
Source: HighWire-hosted journal article supplement (doi:10.1136/rmdopen-2021-001657), 2021-09-01
Supplement: rmdopen-2021-001657supp003_data_supplement.pdf [file rmdopen-2021-001657supp003_data_supplement.pdf]

**Table S3: All genes significantly downregulated by ibuprofen in interleukin 1 $\beta$  -treated chondrocytes**

| Gene      | Name                                                                                          | Mean (IL1) | Mean (IL1+ibu) | FC           | adj. p   |
|-----------|-----------------------------------------------------------------------------------------------|------------|----------------|--------------|----------|
| IL23A     | interleukin 23 subunit alpha [Source:HGNC Symbol;Acc:HGNC:15488]                              | 15.2       | 4.7            | <b>-3.24</b> | 0        |
| HAS1      | hyaluronan synthase 1 [Source:HGNC Symbol;Acc:HGNC:4818]                                      | 0.8        | 0.3            | <b>-2.77</b> | 0        |
| IGFBP4    | insulin like growth factor binding protein 4 [Source:HGNC Symbol;Acc:HGNC:5473]               | 213.8      | 79.7           | <b>-2.73</b> | 0        |
| IL6       | interleukin 6 [Source:HGNC Symbol;Acc:HGNC:6018]                                              | 958.4      | 403.8          | <b>-2.49</b> | 0        |
| PDE3A     | phosphodiesterase 3A [Source:HGNC Symbol;Acc:HGNC:8778]                                       | 0.9        | 0.3            | <b>-2.48</b> | 0.00013  |
| STAT4     | signal transducer and activator of transcription 4 [Source:HGNC Symbol;Acc:HGNC:11365]        | 2.5        | 1.0            | <b>-2.36</b> | 0        |
| LINC00968 | long intergenic non-protein coding RNA 968 [Source:HGNC Symbol;Acc:HGNC:48727]                | 0.7        | 0.3            | <b>-2.22</b> | 0.00045  |
| PCSK1     | proprotein convertase subtilisin/kexin type 1 [Source:HGNC Symbol;Acc:HGNC:8743]              | 7.2        | 3.2            | <b>-2.19</b> | 0        |
| ADAMTS6   | ADAM metallopeptidase with thrombospondin type 1 motif 6 [Source:HGNC Symbol;Acc:HGNC:222]    | 10.5       | 4.9            | <b>-2.18</b> | 0        |
| HAL       | histidine ammonia-lyase [Source:HGNC Symbol;Acc:HGNC:4806]                                    | 1.7        | 0.8            | <b>-2.12</b> | 0        |
| DNAH17    | dynein axonemal heavy chain 17 [Source:HGNC Symbol;Acc:HGNC:2946]                             | 1.0        | 0.5            | <b>-2.06</b> | 2.00E-06 |
| CSF3      | colony stimulating factor 3 [Source:HGNC Symbol;Acc:HGNC:2438]                                | 19.8       | 9.9            | <b>-2.02</b> | 0        |
| AREG      | amphiregulin [Source:HGNC Symbol;Acc:HGNC:651]                                                | 2.3        | 1.2            | <b>-2.01</b> | 0        |
| CA12      | carbonic anhydrase 12 [Source:HGNC Symbol;Acc:HGNC:1371]                                      | 20.9       | 10.5           | <b>-2.00</b> | 0        |
| INSC      | inscuteable homolog (Drosophila) [Source:HGNC Symbol;Acc:HGNC:33116]                          | 0.6        | 0.3            | <b>-1.98</b> | 0.0011   |
| KCNE5     | potassium voltage-gated channel subfamily E regulatory subunit 5                              | 1.3        | 0.6            | <b>-1.94</b> | 6.00E-06 |
| LDB2      | LIM domain binding 2 [Source:HGNC Symbol;Acc:HGNC:6533]                                       | 0.5        | 0.3            | <b>-1.92</b> | 0.0051   |
| LINC00707 | long intergenic non-protein coding RNA 707 [Source:HGNC Symbol;Acc:HGNC:44691]                | 5.6        | 2.9            | <b>-1.91</b> | 0        |
| FOXCUT    | FOXC1 upstream transcript (non-protein coding) [Source:HGNC Symbol;Acc:HGNC:50650]            | 0.4        | 0.2            | <b>-1.81</b> | 0.043    |
| DOK6      | docking protein 6 [Source:HGNC Symbol;Acc:HGNC:28301]                                         | 0.9        | 0.5            | <b>-1.80</b> | 0.00060  |
| DAW1      | dynein assembly factor with WD repeats 1 [Source:HGNC Symbol;Acc:HGNC:26383]                  | 0.9        | 0.5            | <b>-1.78</b> | 0.00057  |
| TMEM71    | transmembrane protein 71 [Source:HGNC Symbol;Acc:HGNC:26572]                                  | 1.8        | 1.0            | <b>-1.77</b> | 2.00E-06 |
| MAMSTR    | MEF2 activating motif and SAP domain containing transcriptional regulator                     | 0.5        | 0.3            | <b>-1.72</b> | 0.022    |
| KNDC1     | kinase non-catalytic C-lobe domain containing 1 [Source:HGNC Symbol;Acc:HGNC:29374]           | 0.8        | 0.5            | <b>-1.70</b> | 0.0028   |
| EFHC2     | EF-hand domain containing 2 [Source:HGNC Symbol;Acc:HGNC:26233]                               | 0.8        | 0.5            | <b>-1.69</b> | 0.0047   |
| MEX3A     | mex-3 RNA binding family member A [Source:HGNC Symbol;Acc:HGNC:33482]                         | 0.9        | 0.5            | <b>-1.69</b> | 0.0019   |
| DPY19L2P1 | DPY19L2 pseudogene 1 [Source:HGNC Symbol;Acc:HGNC:22305]                                      | 0.6        | 0.4            | <b>-1.65</b> | 0.033    |
| TGFBI     | transforming growth factor beta induced [Source:HGNC Symbol;Acc:HGNC:11771]                   | 127.8      | 80.7           | <b>-1.64</b> | 0        |
| C3AR1     | complement C3a receptor 1 [Source:HGNC Symbol;Acc:HGNC:1319]                                  | 3.5        | 2.2            | <b>-1.63</b> | 0        |
| EFEMP1    | EGF containing fibulin like extracellular matrix protein 1 [Source:HGNC Symbol;Acc:HGNC:3218] | 72.6       | 45.4           | <b>-1.63</b> | 0        |
| NAMPT     | nicotinamide phosphoribosyltransferase [Source:HGNC Symbol;Acc:HGNC:30092]                    | 596.1      | 368.8          | <b>-1.60</b> | 0        |

|            |                                                                                           |       |       |              |          |
|------------|-------------------------------------------------------------------------------------------|-------|-------|--------------|----------|
| FOXF1      | forkhead box F1 [Source:HGNC Symbol;Acc:HGNC:3809]                                        | 1.2   | 0.8   | <b>-1.60</b> | 0.00093  |
| AVPI1      | arginine vasopressin induced 1 [Source:HGNC Symbol;Acc:HGNC:30898]                        | 39.7  | 24.8  | <b>-1.60</b> | 0        |
| SEMA3A     | semaphorin 3A [Source:HGNC Symbol;Acc:HGNC:10723]                                         | 98.0  | 61.6  | <b>-1.59</b> | 0        |
| STC1       | stanniocalcin 1 [Source:HGNC Symbol;Acc:HGNC:11373]                                       | 2.0   | 1.3   | <b>-1.59</b> | 0.0030   |
| TSKU       | tsukushi, small leucine rich proteoglycan [Source:HGNC Symbol;Acc:HGNC:28850]             | 14.9  | 9.4   | <b>-1.58</b> | 0        |
| SMOC1      | SPARC related modular calcium binding 1 [Source:HGNC Symbol;Acc:HGNC:20318]               | 199.0 | 126.1 | <b>-1.57</b> | 0        |
| ARAP2      | ArfGAP with RhoGAP domain, ankyrin repeat and PH domain 2                                 | 12.5  | 8.0   | <b>-1.56</b> | 0        |
| NAMPTP1    | nicotinamide phosphoribosyltransferase pseudogene 1 [Source:HGNC Symbol;Acc:HGNC:17633]   | 26.1  | 16.3  | <b>-1.56</b> | 0        |
| BEND5      | BEN domain containing 5 [Source:HGNC Symbol;Acc:HGNC:25668]                               | 0.9   | 0.6   | <b>-1.54</b> | 0.017    |
| EPB41L3    | erythrocyte membrane protein band 4.1 like 3 [Source:HGNC Symbol;Acc:HGNC:3380]           | 34.6  | 22.5  | <b>-1.53</b> | 0        |
| EPB41L4B   | erythrocyte membrane protein band 4.1 like 4B [Source:HGNC Symbol;Acc:HGNC:19818]         | 2.8   | 1.8   | <b>-1.53</b> | 0.00011  |
| KIAA1217   | KIAA1217 [Source:HGNC Symbol;Acc:HGNC:25428]                                              | 19.0  | 12.6  | <b>-1.52</b> | 0        |
| CFAP58-AS1 | CFAP58 antisense RNA 1 (head to head) [Source:HGNC Symbol;Acc:HGNC:45243]                 | 2.0   | 1.5   | <b>-1.52</b> | 1.20E-05 |
| ACSL4      | acyl-CoA synthetase long-chain family member 4 [Source:HGNC Symbol;Acc:HGNC:3571]         | 428.1 | 280.7 | <b>-1.52</b> | 0        |
| NR4A2      | nuclear receptor subfamily 4 group A member 2 [Source:HGNC Symbol;Acc:HGNC:7981]          | 19.8  | 13.1  | <b>-1.51</b> | 0        |
| PID1       | phosphotyrosine interaction domain containing 1 [Source:HGNC Symbol;Acc:HGNC:26084]       | 285.1 | 190.6 | <b>-1.51</b> | 0        |
| RSPO3      | R-spondin 3 [Source:HGNC Symbol;Acc:HGNC:20866]                                           | 82.9  | 53.8  | <b>-1.50</b> | 0        |
| KRT17      | keratin 17 [Source:HGNC Symbol;Acc:HGNC:6427]                                             | 14.4  | 9.7   | <b>-1.50</b> | 0        |
| IL1B       | interleukin 1 beta [Source:HGNC Symbol;Acc:HGNC:5992]                                     | 572.6 | 394.9 | <b>-1.50</b> | 0        |
| IGLV5-52   | immunoglobulin lambda variable 5-52 [Source:HGNC Symbol;Acc:HGNC:5926]                    | 0.9   | 0.6   | <b>-1.49</b> | 0.031    |
| CH25H      | cholesterol 25-hydroxylase [Source:HGNC Symbol;Acc:HGNC:1907]                             | 2.3   | 1.6   | <b>-1.49</b> | 0.0054   |
| PITPNC1    | phosphatidylinositol transfer protein, cytoplasmic 1 [Source:HGNC Symbol;Acc:HGNC:21045]  | 26.5  | 17.8  | <b>-1.49</b> | 0        |
| LDHAP7     | lactate dehydrogenase A pseudogene 7 [Source:HGNC Symbol;Acc:HGNC:23144]                  | 1.1   | 0.7   | <b>-1.48</b> | 0.014    |
| ABHD17C    | abhydrolase domain containing 17C [Source:HGNC Symbol;Acc:HGNC:26925]                     | 7.7   | 5.2   | <b>-1.48</b> | 0        |
| RGL3       | ral guanine nucleotide dissociation stimulator like 3 [Source:HGNC Symbol;Acc:HGNC:30282] | 3.3   | 2.2   | <b>-1.48</b> | 4.60E-05 |
| FBXO16     | F-box protein 16 [Source:HGNC Symbol;Acc:HGNC:13618]                                      | 1.1   | 0.7   | <b>-1.47</b> | 0.018    |
| NNMT       | nicotinamide N-methyltransferase [Source:HGNC Symbol;Acc:HGNC:7861]                       | 141.3 | 95.6  | <b>-1.47</b> | 0        |
| SCO2       | SCO2, cytochrome c oxidase assembly protein [Source:HGNC Symbol;Acc:HGNC:10604]           | 2.2   | 1.5   | <b>-1.46</b> | 0.00016  |
| NDP        | NDP, norrin cystine knot growth factor [Source:HGNC Symbol;Acc:HGNC:7678]                 | 49.1  | 34.1  | <b>-1.46</b> | 0        |
| DISC1      | disrupted in schizophrenia 1 [Source:HGNC Symbol;Acc:HGNC:2888]                           | 4.1   | 2.8   | <b>-1.46</b> | 8.20E-05 |
| AQP9       | aquaporin 9 [Source:HGNC Symbol;Acc:HGNC:643]                                             | 2.1   | 1.4   | <b>-1.45</b> | 0.031    |
| NEGR1      | neuronal growth regulator 1 [Source:HGNC Symbol;Acc:HGNC:17302]                           | 27.2  | 18.4  | <b>-1.45</b> | 0        |
| MMP13      | matrix metalloproteinase 13 [Source:HGNC Symbol;Acc:HGNC:7159]                            | 407.7 | 282.6 | <b>-1.45</b> | 0        |

|         |                                                                                           |       |       |              |          |
|---------|-------------------------------------------------------------------------------------------|-------|-------|--------------|----------|
| SLC19A3 | solute carrier family 19 member 3 [Source:HGNC Symbol;Acc:HGNC:16266]                     | 17.6  | 12.3  | <b>-1.45</b> | 0        |
| SLAMF9  | SLAM family member 9 [Source:HGNC Symbol;Acc:HGNC:18430]                                  | 1.8   | 1.2   | <b>-1.45</b> | 0.014    |
| CD1D    | CD1d molecule [Source:HGNC Symbol;Acc:HGNC:1637]                                          | 1.6   | 1.1   | <b>-1.44</b> | 0.0027   |
| ALPK2   | alpha kinase 2 [Source:HGNC Symbol;Acc:HGNC:20565]                                        | 1.2   | 0.8   | <b>-1.44</b> | 0.023    |
| SGIP1   | SH3 domain GRB2 like endophilin interacting protein 1 [Source:HGNC Symbol;Acc:HGNC:25412] | 2.2   | 1.5   | <b>-1.44</b> | 0.00067  |
| COQ2    | coenzyme Q2, polyprenyltransferase [Source:HGNC Symbol;Acc:HGNC:25223]                    | 6.2   | 4.3   | <b>-1.44</b> | 0        |
| PALMD   | palmelphin [Source:HGNC Symbol;Acc:HGNC:15846]                                            | 42.7  | 29.8  | <b>-1.43</b> | 0        |
| GBP1P1  | guanylate binding protein 1 pseudogene 1 [Source:HGNC Symbol;Acc:HGNC:39561]              | 1.1   | 0.8   | <b>-1.43</b> | 0.024    |
| MBP     | myelin basic protein [Source:HGNC Symbol;Acc:HGNC:6925]                                   | 18.2  | 12.7  | <b>-1.43</b> | 0        |
| GFRA2   | GNF family receptor alpha 2 [Source:HGNC Symbol;Acc:HGNC:4244]                            | 1.5   | 1.1   | <b>-1.43</b> | 0.0094   |
| ARID5B  | AT-rich interaction domain 5B [Source:HGNC Symbol;Acc:HGNC:17362]                         | 31.2  | 21.7  | <b>-1.43</b> | 0        |
| SHISA3  | shisa family member 3 [Source:HGNC Symbol;Acc:HGNC:25159]                                 | 2.2   | 1.5   | <b>-1.42</b> | 0.0051   |
| GPR89A  | G protein-coupled receptor 89A [Source:HGNC Symbol;Acc:HGNC:31984]                        | 1.8   | 1.3   | <b>-1.41</b> | 0.0024   |
| HOXA4   | homeobox A4 [Source:HGNC Symbol;Acc:HGNC:5105]                                            | 1.3   | 0.9   | <b>-1.41</b> | 0.040    |
| ABCA8   | ATP binding cassette subfamily A member 8 [Source:HGNC Symbol;Acc:HGNC:38]                | 1.2   | 0.9   | <b>-1.41</b> | 0.023    |
| CD38    | CD38 molecule [Source:HGNC Symbol;Acc:HGNC:1667]                                          | 3.8   | 2.7   | <b>-1.41</b> | 1.20E-05 |
| UBE2QL1 | ubiquitin conjugating enzyme E2 Q family like 1 [Source:HGNC Symbol;Acc:HGNC:37269]       | 5.3   | 3.8   | <b>-1.41</b> | 0.00034  |
| ALOX12  | arachidonate 12-lipoxygenase, 12S type [Source:HGNC Symbol;Acc:HGNC:429]                  | 1.3   | 0.9   | <b>-1.40</b> | 0.022    |
| GJA1    | gap junction protein alpha 1 [Source:HGNC Symbol;Acc:HGNC:4274]                           | 115.2 | 82.4  | <b>-1.39</b> | 0        |
| AKR1C1  | aldo-keto reductase family 1 member C1 [Source:HGNC Symbol;Acc:HGNC:384]                  | 171.3 | 121.8 | <b>-1.38</b> | 0        |
| TREM1   | triggering receptor expressed on myeloid cells 1 [Source:HGNC Symbol;Acc:HGNC:17760]      | 45.2  | 32.8  | <b>-1.38</b> | 0        |
| PDE4D   | phosphodiesterase 4D [Source:HGNC Symbol;Acc:HGNC:8783]                                   | 25.4  | 18.2  | <b>-1.38</b> | 0        |
| LRRK2   | leucine rich repeat kinase 2 [Source:HGNC Symbol;Acc:HGNC:18618]                          | 2.3   | 1.6   | <b>-1.38</b> | 0.012    |
| ID1     | inhibitor of DNA binding 1, HLH protein [Source:HGNC Symbol;Acc:HGNC:5360]                | 26.8  | 19.3  | <b>-1.37</b> | 0        |
| SFRP2   | secreted frizzled related protein 2 [Source:HGNC Symbol;Acc:HGNC:10777]                   | 1.6   | 1.1   | <b>-1.37</b> | 0.040    |
| PDE4B   | phosphodiesterase 4B [Source:HGNC Symbol;Acc:HGNC:8781]                                   | 419.5 | 307.7 | <b>-1.37</b> | 0        |
| LRRN3   | leucine rich repeat neuronal 3 [Source:HGNC Symbol;Acc:HGNC:17200]                        | 8.9   | 6.5   | <b>-1.36</b> | 0        |
| COL7A1  | collagen type VII alpha 1 chain [Source:HGNC Symbol;Acc:HGNC:2214]                        | 41.0  | 30.2  | <b>-1.36</b> | 0        |
| GPRC5A  | G protein-coupled receptor class C group 5 member A [Source:HGNC Symbol;Acc:HGNC:9836]    | 96.5  | 71.9  | <b>-1.36</b> | 0        |
| DNER    | delta/notch like EGF repeat containing [Source:HGNC Symbol;Acc:HGNC:24456]                | 139.0 | 104.5 | <b>-1.35</b> | 0        |
| LURAP1L | leucine rich adaptor protein 1 like [Source:HGNC Symbol;Acc:HGNC:31452]                   | 15.3  | 11.4  | <b>-1.35</b> | 0        |
| PRR5L   | proline rich 5 like [Source:HGNC Symbol;Acc:HGNC:25878]                                   | 1.9   | 1.4   | <b>-1.35</b> | 0.012    |
| COL3A1  | collagen type III alpha 1 chain [Source:HGNC Symbol;Acc:HGNC:2201]                        | 556.0 | 414.0 | <b>-1.35</b> | 0        |

|          |                                                                                                  |       |       |              |          |
|----------|--------------------------------------------------------------------------------------------------|-------|-------|--------------|----------|
| CXCL6    | C-X-C motif chemokine ligand 6 [Source:HGNC Symbol;Acc:HGNC:10643]                               | 431.5 | 319.5 | <b>-1.35</b> | 0        |
| EVI2B    | ecotropic viral integration site 2B [Source:HGNC Symbol;Acc:HGNC:3500]                           | 2.5   | 1.8   | <b>-1.34</b> | 0.022    |
| CLUHP3   | clustered mitochondria homolog pseudogene 3 [Source:HGNC Symbol;Acc:HGNC:28447]                  | 2.7   | 2.0   | <b>-1.34</b> | 0.034    |
| SH3RF2   | SH3 domain containing ring finger 2 [Source:HGNC Symbol;Acc:HGNC:26299]                          | 6.0   | 4.4   | <b>-1.34</b> | 8.90E-05 |
| LRR61    | leucine rich repeat containing 61 [Source:HGNC Symbol;Acc:HGNC:21704]                            | 3.1   | 2.3   | <b>-1.34</b> | 0.015    |
| ITPR1    | inositol 1,4,5-trisphosphate receptor interacting protein [Source:HGNC Symbol;Acc:HGNC:29370]    | 228.0 | 169.6 | <b>-1.34</b> | 0        |
| AMDHD1   | amidohydrolase domain containing 1 [Source:HGNC Symbol;Acc:HGNC:28577]                           | 1.4   | 1.0   | <b>-1.33</b> | 0.049    |
| FCER1G   | Fc fragment of IgE receptor Ig [Source:HGNC Symbol;Acc:HGNC:3611]                                | 2.6   | 2.0   | <b>-1.33</b> | 0.0047   |
| LAMA1    | laminin subunit alpha 1 [Source:HGNC Symbol;Acc:HGNC:6481]                                       | 12.6  | 9.3   | <b>-1.33</b> | 0.0017   |
| FOXC1    | forkhead box C1 [Source:HGNC Symbol;Acc:HGNC:3800]                                               | 289.7 | 216.7 | <b>-1.33</b> | 0        |
| BDKRB2   | bradykinin receptor B2 [Source:HGNC Symbol;Acc:HGNC:1030]                                        | 80.9  | 60.9  | <b>-1.33</b> | 0        |
| DUSP1    | dual specificity phosphatase 1 [Source:HGNC Symbol;Acc:HGNC:3064]                                | 158.6 | 118.2 | <b>-1.33</b> | 0        |
| PRKAR2B  | protein kinase cAMP-dependent type II regulatory subunit beta [Source:HGNC Symbol;Acc:HGNC:9392] | 18.3  | 13.7  | <b>-1.33</b> | 8.70E-05 |
| MMP2     | matrix metalloproteinase 2 [Source:HGNC Symbol;Acc:HGNC:7166]                                    | 70.5  | 54.6  | <b>-1.33</b> | 0        |
| KIAA1958 | KIAA1958 [Source:HGNC Symbol;Acc:HGNC:23427]                                                     | 2.5   | 1.9   | <b>-1.32</b> | 0.010    |
| CP       | ceruloplasmin [Source:HGNC Symbol;Acc:HGNC:2295]                                                 | 234.5 | 178.1 | <b>-1.32</b> | 0        |
| STON1    | stonin 1 [Source:HGNC Symbol;Acc:HGNC:17003]                                                     | 6.9   | 5.1   | <b>-1.32</b> | 0.0045   |
| IGF1     | insulin like growth factor 1 [Source:HGNC Symbol;Acc:HGNC:5464]                                  | 7.6   | 5.7   | <b>-1.32</b> | 1.00E-05 |
| ADAMTSL1 | ADAMTS like 1 [Source:HGNC Symbol;Acc:HGNC:14632]                                                | 4.0   | 3.1   | <b>-1.32</b> | 0.013    |
| RAB20    | RAB20, member RAS oncogene family [Source:HGNC Symbol;Acc:HGNC:18260]                            | 4.9   | 3.7   | <b>-1.31</b> | 0.00058  |
| PTGES    | prostaglandin E synthase [Source:HGNC Symbol;Acc:HGNC:9599]                                      | 100.9 | 76.6  | <b>-1.31</b> | 0        |
| S100P    | S100 calcium binding protein P [Source:HGNC Symbol;Acc:HGNC:10504]                               | 3.3   | 2.5   | <b>-1.31</b> | 0.0039   |
| CPM      | carboxypeptidase M [Source:HGNC Symbol;Acc:HGNC:2311]                                            | 15.8  | 12.1  | <b>-1.31</b> | 0        |
| VNN3     | vanin 3 [Source:HGNC Symbol;Acc:HGNC:16431]                                                      | 10.6  | 8.3   | <b>-1.30</b> | 0.00086  |
| FBLN5    | fibulin 5 [Source:HGNC Symbol;Acc:HGNC:3602]                                                     | 4.8   | 3.7   | <b>-1.30</b> | 0.0062   |
| ADAMTS5  | ADAM metalloproteinase with thrombospondin type 1 motif 5 [Source:HGNC Symbol;Acc:HGNC:221]      | 21.7  | 16.3  | <b>-1.30</b> | 2.20E-05 |
| ARID3A   | AT-rich interaction domain 3A [Source:HGNC Symbol;Acc:HGNC:3031]                                 | 4.8   | 3.8   | <b>-1.30</b> | 0.0025   |
| PRELID2  | PRELI domain containing 2 [Source:HGNC Symbol;Acc:HGNC:28306]                                    | 2.8   | 2.1   | <b>-1.30</b> | 0.018    |
| SPSB4    | splA/ryanodine receptor domain and SOCS box containing 4 [Source:HGNC Symbol;Acc:HGNC:30630]     | 11.6  | 8.9   | <b>-1.30</b> | 0        |
| MAOB     | monoamine oxidase B [Source:HGNC Symbol;Acc:HGNC:6834]                                           | 156.0 | 120.6 | <b>-1.30</b> | 0        |
| PFKFB4   | 6-phosphofructo-2-kinase/fructose-2,6-bisphosphatase 4 [Source:HGNC Symbol;Acc:HGNC:8875]        | 10.9  | 8.4   | <b>-1.30</b> | 0        |
| TREML3P  | triggering receptor expressed on myeloid cells like 3, pseudogene                                | 2.8   | 2.2   | <b>-1.30</b> | 0.012    |
| ADPRHL1  | ADP-ribosylhydrolase like 1 [Source:HGNC Symbol;Acc:HGNC:21303]                                  | 9.3   | 7.2   | <b>-1.29</b> | 1.20E-05 |

|            |                                                                                          |       |       |              |          |
|------------|------------------------------------------------------------------------------------------|-------|-------|--------------|----------|
| GNG11      | G protein subunit gamma 11 [Source:HGNC Symbol;Acc:HGNC:4403]                            | 21.7  | 16.7  | <b>-1.29</b> | 0        |
| ODF3B      | outer dense fiber of sperm tails 3B [Source:HGNC Symbol;Acc:HGNC:34388]                  | 15.4  | 12.1  | <b>-1.29</b> | 2.80E-05 |
| GNA14      | G protein subunit alpha 14 [Source:HGNC Symbol;Acc:HGNC:4382]                            | 2.0   | 1.5   | <b>-1.29</b> | 0.045    |
| FAM13A     | family with sequence similarity 13 member A [Source:HGNC Symbol;Acc:HGNC:19367]          | 25.7  | 20.0  | <b>-1.29</b> | 5.00E-06 |
| C1R        | complement C1r [Source:HGNC Symbol;Acc:HGNC:1246]                                        | 106.4 | 82.5  | <b>-1.29</b> | 0        |
| MEIS1      | Meis homeobox 1 [Source:HGNC Symbol;Acc:HGNC:7000]                                       | 5.9   | 4.5   | <b>-1.29</b> | 0.00015  |
| CMBL       | carboxymethylenebutenolidase homolog [Source:HGNC Symbol;Acc:HGNC:25090]                 | 2.8   | 2.2   | <b>-1.29</b> | 0.0062   |
| DEPDC7     | DEP domain containing 7 [Source:HGNC Symbol;Acc:HGNC:29899]                              | 4.9   | 3.8   | <b>-1.28</b> | 0.00069  |
| HOXA5      | homeobox A5 [Source:HGNC Symbol;Acc:HGNC:5106]                                           | 4.7   | 3.7   | <b>-1.28</b> | 0.00052  |
| MT1F       | metallothionein 1F [Source:HGNC Symbol;Acc:HGNC:7398]                                    | 182.7 | 143.4 | <b>-1.28</b> | 3.40E-05 |
| ABCA1      | ATP binding cassette subfamily A member 1 [Source:HGNC Symbol;Acc:HGNC:29]               | 3.9   | 3.1   | <b>-1.28</b> | 0.017    |
| IL11       | interleukin 11 [Source:HGNC Symbol;Acc:HGNC:5966]                                        | 12.2  | 9.1   | <b>-1.28</b> | 0.012    |
| MARCKS     | myristoylated alanine rich protein kinase C substrate [Source:HGNC Symbol;Acc:HGNC:6759] | 261.8 | 206.3 | <b>-1.28</b> | 0        |
| GDF6       | growth differentiation factor 6 [Source:HGNC Symbol;Acc:HGNC:4221]                       | 121.1 | 95.5  | <b>-1.28</b> | 1.00E-06 |
| DOCK4      | dedicator of cytokinesis 4 [Source:HGNC Symbol;Acc:HGNC:19192]                           | 6.7   | 5.3   | <b>-1.28</b> | 0.039    |
| KSR1       | kinase suppressor of ras 1 [Source:HGNC Symbol;Acc:HGNC:6465]                            | 10.7  | 8.4   | <b>-1.27</b> | 2.00E-06 |
| IRF4       | interferon regulatory factor 4 [Source:HGNC Symbol;Acc:HGNC:6119]                        | 18.2  | 14.4  | <b>-1.27</b> | 0        |
| GTF2IRD2B  | GTF2I repeat domain containing 2B [Source:HGNC Symbol;Acc:HGNC:33125]                    | 3.3   | 2.5   | <b>-1.27</b> | 0.013    |
| LINC02015  | long intergenic non-protein coding RNA 2015 [Source:HGNC Symbol;Acc:HGNC:52850]          | 5.8   | 4.6   | <b>-1.27</b> | 0.0016   |
| CCL7       | C-C motif chemokine ligand 7 [Source:HGNC Symbol;Acc:HGNC:10634]                         | 5.5   | 4.2   | <b>-1.27</b> | 0.0027   |
| ZNF503-AS2 | ZNF503 antisense RNA 2 [Source:HGNC Symbol;Acc:HGNC:23525]                               | 3.2   | 2.5   | <b>-1.27</b> | 0.034    |
| CCDC71L    | coiled-coil domain containing 71 like [Source:HGNC Symbol;Acc:HGNC:26685]                | 77.3  | 60.9  | <b>-1.27</b> | 0        |
| LOXL3      | lysyl oxidase like 3 [Source:HGNC Symbol;Acc:HGNC:13869]                                 | 67.8  | 55.0  | <b>-1.27</b> | 1.00E-06 |
| INSIG2     | insulin induced gene 2 [Source:HGNC Symbol;Acc:HGNC:20452]                               | 69.7  | 55.4  | <b>-1.26</b> | 0        |
| SMTN       | smoothelin [Source:HGNC Symbol;Acc:HGNC:11126]                                           | 244.4 | 192.5 | <b>-1.26</b> | 0        |
| COLEC12    | collectin subfamily member 12 [Source:HGNC Symbol;Acc:HGNC:16016]                        | 24.9  | 19.4  | <b>-1.26</b> | 0        |
| POLB       | DNA polymerase beta [Source:HGNC Symbol;Acc:HGNC:9174]                                   | 5.2   | 4.1   | <b>-1.26</b> | 0.0027   |
| ATOH8      | atonal bHLH transcription factor 8 [Source:HGNC Symbol;Acc:HGNC:24126]                   | 11.3  | 9.5   | <b>-1.26</b> | 0.0070   |
| ABL1       | ABL proto-oncogene 1, non-receptor tyrosine kinase [Source:HGNC Symbol;Acc:HGNC:76]      | 98.8  | 78.0  | <b>-1.26</b> | 0        |
| PANX2      | pannexin 2 [Source:HGNC Symbol;Acc:HGNC:8600]                                            | 11.5  | 9.0   | <b>-1.26</b> | 5.10E-05 |
| LRMDA      | leucine rich melanocyte differentiation associated [Source:HGNC Symbol;Acc:HGNC:23405]   | 5.4   | 4.3   | <b>-1.26</b> | 0.0012   |
| TNFAIP6    | TNF alpha induced protein 6 [Source:HGNC Symbol;Acc:HGNC:11898]                          | 966.1 | 782.8 | <b>-1.26</b> | 0        |
| FAM110B    | family with sequence similarity 110 member B [Source:HGNC Symbol;Acc:HGNC:28587]         | 45.2  | 36.0  | <b>-1.26</b> | 0        |



|           |                                                                                              |       |       |              |          |
|-----------|----------------------------------------------------------------------------------------------|-------|-------|--------------|----------|
| MARCH9    | membrane associated ring-CH-type finger 9 [Source:HGNC Symbol;Acc:HGNC:25139]                | 5.7   | 4.5   | <b>-1.26</b> | 0.0034   |
| MCTP2     | multiple C2 and transmembrane domain containing 2 [Source:HGNC Symbol;Acc:HGNC:25636]        | 12.5  | 9.9   | <b>-1.25</b> | 1.60E-05 |
| LNK1      | ligand of numb-protein X 1 [Source:HGNC Symbol;Acc:HGNC:6657]                                | 4.8   | 3.8   | <b>-1.25</b> | 0.0072   |
| MN1       | MN1 proto-oncogene, transcriptional regulator [Source:HGNC Symbol;Acc:HGNC:7180]             | 24.3  | 19.3  | <b>-1.25</b> | 1.00E-06 |
| CXCL5     | C-X-C motif chemokine ligand 5 [Source:HGNC Symbol;Acc:HGNC:10642]                           | 285.0 | 223.0 | <b>-1.25</b> | 0        |
| MILR1     | mast cell immunoglobulin like receptor 1 [Source:HGNC Symbol;Acc:HGNC:27570]                 | 3.6   | 2.9   | <b>-1.25</b> | 0.031    |
| KIF7      | kinesin family member 7 [Source:HGNC Symbol;Acc:HGNC:30497]                                  | 4.1   | 3.2   | <b>-1.25</b> | 0.013    |
| PELI3     | pellino E3 ubiquitin protein ligase family member 3 [Source:HGNC Symbol;Acc:HGNC:30010]      | 3.4   | 2.7   | <b>-1.25</b> | 0.045    |
| GYS1      | glycogen synthase 1 [Source:HGNC Symbol;Acc:HGNC:4706]                                       | 38.9  | 31.1  | <b>-1.25</b> | 1.00E-06 |
| TMTC1     | transmembrane and tetratricopeptide repeat containing 1 [Source:HGNC Symbol;Acc:HGNC:24099]  | 55.9  | 45.1  | <b>-1.24</b> | 0.0013   |
| ISG20     | interferon stimulated exonuclease gene 20 [Source:HGNC Symbol;Acc:HGNC:6130]                 | 75.4  | 59.7  | <b>-1.24</b> | 1.00E-06 |
| HILPDA    | hypoxia inducible lipid droplet associated [Source:HGNC Symbol;Acc:HGNC:28859]               | 24.2  | 19.3  | <b>-1.24</b> | 0.0035   |
| TNFRSF1B  | TNF receptor superfamily member 1B [Source:HGNC Symbol;Acc:HGNC:11917]                       | 197.8 | 159.1 | <b>-1.24</b> | 0        |
| PRPF40B   | pre-mRNA processing factor 40 homolog B [Source:HGNC Symbol;Acc:HGNC:25031]                  | 8.1   | 6.5   | <b>-1.24</b> | 0.00059  |
| C17orf107 | chromosome 17 open reading frame 107 [Source:HGNC Symbol;Acc:HGNC:37238]                     | 11.9  | 9.5   | <b>-1.24</b> | 1.20E-05 |
| ENOSF1    | enolase superfamily member 1 [Source:HGNC Symbol;Acc:HGNC:30365]                             | 29.7  | 23.9  | <b>-1.24</b> | 0.00028  |
| WISP1     | WNT1 inducible signaling pathway protein 1 [Source:HGNC Symbol;Acc:HGNC:12769]               | 22.2  | 17.6  | <b>-1.24</b> | 9.80E-05 |
| TRANK1    | tetratricopeptide repeat and ankyrin repeat containing 1 [Source:HGNC Symbol;Acc:HGNC:29011] | 11.1  | 9.0   | <b>-1.24</b> | 0.031    |
| AKR1C2    | aldo-keto reductase family 1 member C2 [Source:HGNC Symbol;Acc:HGNC:385]                     | 767.6 | 623.1 | <b>-1.24</b> | 0        |
| CSGALNACT | chondroitin sulfate N-acetylgalactosaminyltransferase 1 [Source:HGNC Symbol;Acc:HGNC:24290]  | 177.5 | 143.4 | <b>-1.24</b> | 1.00E-06 |
| ADAMTS4   | ADAM metalloproteinase with thrombospondin type 1 motif 4 [Source:HGNC Symbol;Acc:HGNC:220]  | 2.7   | 2.2   | <b>-1.24</b> | 0.035    |
| ADSSL1    | adenylosuccinate synthase like 1 [Source:HGNC Symbol;Acc:HGNC:20093]                         | 7.2   | 6.0   | <b>-1.24</b> | 0.016    |
| HTATIP2   | HIV-1 Tat interactive protein 2 [Source:HGNC Symbol;Acc:HGNC:16637]                          | 23.1  | 18.6  | <b>-1.23</b> | 3.20E-05 |
| CHEK2     | checkpoint kinase 2 [Source:HGNC Symbol;Acc:HGNC:16627]                                      | 6.3   | 5.1   | <b>-1.23</b> | 0.0013   |
| GMDS      | GDP-mannose 4,6-dehydratase [Source:HGNC Symbol;Acc:HGNC:4369]                               | 24.9  | 20.3  | <b>-1.23</b> | 0.00011  |
| LMO2      | LIM domain only 2 [Source:HGNC Symbol;Acc:HGNC:6642]                                         | 3.9   | 3.1   | <b>-1.23</b> | 0.040    |
| S100A9    | S100 calcium binding protein A9 [Source:HGNC Symbol;Acc:HGNC:10499]                          | 15.6  | 12.7  | <b>-1.23</b> | 0.0061   |
| ZNF331    | zinc finger protein 331 [Source:HGNC Symbol;Acc:HGNC:15489]                                  | 19.1  | 15.4  | <b>-1.23</b> | 5.90E-05 |
| GRAMD1A   | GRAM domain containing 1A [Source:HGNC Symbol;Acc:HGNC:29305]                                | 16.8  | 13.6  | <b>-1.23</b> | 2.00E-05 |
| BASP1     | brain abundant membrane attached signal protein 1 [Source:HGNC Symbol;Acc:HGNC:957]          | 10.0  | 8.0   | <b>-1.23</b> | 0.0014   |
| PRKCH     | protein kinase C eta [Source:HGNC Symbol;Acc:HGNC:9403]                                      | 5.8   | 4.7   | <b>-1.23</b> | 0.0046   |
| RND3      | Rho family GTPase 3 [Source:HGNC Symbol;Acc:HGNC:671]                                        | 687.5 | 560.9 | <b>-1.23</b> | 0        |
| AKNA      | AT-hook transcription factor [Source:HGNC Symbol;Acc:HGNC:24108]                             | 18.8  | 15.1  | <b>-1.23</b> | 0.00015  |

|          |                                                                                             |        |        |              |          |
|----------|---------------------------------------------------------------------------------------------|--------|--------|--------------|----------|
| PBX1     | PBX homeobox 1 [Source:HGNC Symbol;Acc:HGNC:8632]                                           | 6.7    | 5.4    | <b>-1.23</b> | 0.022    |
| BARX1    | BARX homeobox 1 [Source:HGNC Symbol;Acc:HGNC:955]                                           | 24.1   | 19.6   | <b>-1.23</b> | 0.00034  |
| CTH      | cystathionine gamma-lyase [Source:HGNC Symbol;Acc:HGNC:2501]                                | 13.5   | 11.0   | <b>-1.23</b> | 0.00013  |
| CHI3L2   | chitinase 3 like 2 [Source:HGNC Symbol;Acc:HGNC:1933]                                       | 1749.8 | 1448.6 | <b>-1.22</b> | 3.00E-06 |
| MT1L     | metallothionein 1L, pseudogene [Source:HGNC Symbol;Acc:HGNC:7404]                           | 76.9   | 62.2   | <b>-1.22</b> | 0.00087  |
| ALDH2    | aldehyde dehydrogenase 2 family (mitochondrial) [Source:HGNC Symbol;Acc:HGNC:404]           | 27.7   | 22.5   | <b>-1.22</b> | 1.40E-05 |
| FUZ      | fuzzy planar cell polarity protein [Source:HGNC Symbol;Acc:HGNC:26219]                      | 9.8    | 7.9    | <b>-1.22</b> | 0.0011   |
| MAN1A1   | mannosidase alpha class 1A member 1 [Source:HGNC Symbol;Acc:HGNC:6821]                      | 394.3  | 321.1  | <b>-1.22</b> | 2.00E-06 |
| NANOS1   | nanos C2HC-type zinc finger 1 [Source:HGNC Symbol;Acc:HGNC:23044]                           | 20.7   | 17.1   | <b>-1.22</b> | 4.30E-05 |
| COL4A2   | collagen type IV alpha 2 chain [Source:HGNC Symbol;Acc:HGNC:2203]                           | 8.1    | 6.6    | <b>-1.22</b> | 0.0016   |
| BOC      | BOC cell adhesion associated, oncogene regulated [Source:HGNC Symbol;Acc:HGNC:17173]        | 28.3   | 23.2   | <b>-1.22</b> | 8.00E-06 |
| PPP1R3C  | protein phosphatase 1 regulatory subunit 3C [Source:HGNC Symbol;Acc:HGNC:9293]              | 218.6  | 181.0  | <b>-1.22</b> | 1.40E-05 |
| AGPAT4   | 1-acylglycerol-3-phosphate O-acyltransferase 4 [Source:HGNC Symbol;Acc:HGNC:20885]          | 17.5   | 14.3   | <b>-1.22</b> | 0.00095  |
| EVI2A    | ecotropic viral integration site 2A [Source:HGNC Symbol;Acc:HGNC:3499]                      | 14.1   | 11.5   | <b>-1.22</b> | 0.0015   |
| RBMS3    | RNA binding motif single stranded interacting protein 3 [Source:HGNC Symbol;Acc:HGNC:13427] | 12.1   | 10.0   | <b>-1.22</b> | 0.017    |
| KAZALD1  | Kazal type serine peptidase inhibitor domain 1 [Source:HGNC Symbol;Acc:HGNC:25460]          | 7.3    | 5.9    | <b>-1.22</b> | 0.0079   |
| ADGRG2   | adhesion G protein-coupled receptor G2 [Source:HGNC Symbol;Acc:HGNC:4516]                   | 27.3   | 22.3   | <b>-1.21</b> | 0.046    |
| HOXC10   | homeobox C10 [Source:HGNC Symbol;Acc:HGNC:5122]                                             | 19.8   | 16.3   | <b>-1.21</b> | 1.00E-06 |
| PGM1     | phosphoglucomutase 1 [Source:HGNC Symbol;Acc:HGNC:8905]                                     | 73.3   | 60.6   | <b>-1.21</b> | 2.00E-06 |
| PLD1     | phospholipase D1 [Source:HGNC Symbol;Acc:HGNC:9067]                                         | 31.3   | 25.5   | <b>-1.21</b> | 0.00056  |
| INHBA    | inhibin beta A subunit [Source:HGNC Symbol;Acc:HGNC:6066]                                   | 694.4  | 564.1  | <b>-1.21</b> | 4.10E-05 |
| PDZRN3   | PDZ domain containing ring finger 3 [Source:HGNC Symbol;Acc:HGNC:17704]                     | 68.6   | 56.0   | <b>-1.21</b> | 1.00E-06 |
| SLC22A23 | solute carrier family 22 member 23 [Source:HGNC Symbol;Acc:HGNC:21106]                      | 42.6   | 34.9   | <b>-1.21</b> | 0.00013  |
| RIN2     | Ras and Rab interactor 2 [Source:HGNC Symbol;Acc:HGNC:18750]                                | 51.6   | 42.4   | <b>-1.21</b> | 3.00E-06 |
| RNF152   | ring finger protein 152 [Source:HGNC Symbol;Acc:HGNC:26811]                                 | 12.5   | 10.1   | <b>-1.20</b> | 0.035    |
| ADD3     | adducin 3 [Source:HGNC Symbol;Acc:HGNC:245]                                                 | 34.4   | 28.3   | <b>-1.20</b> | 6.00E-05 |
| MAMDC4   | MAM domain containing 4 [Source:HGNC Symbol;Acc:HGNC:24083]                                 | 12.0   | 9.9    | <b>-1.20</b> | 0.031    |
| B4GAT1   | beta-1,4-glucuronyltransferase 1 [Source:HGNC Symbol;Acc:HGNC:15685]                        | 6.6    | 5.4    | <b>-1.20</b> | 0.047    |
| HIF1A    | hypoxia inducible factor 1 alpha subunit [Source:HGNC Symbol;Acc:HGNC:4910]                 | 406.5  | 334.6  | <b>-1.20</b> | 2.70E-05 |
| TRIB2    | tribbles pseudokinase 2 [Source:HGNC Symbol;Acc:HGNC:30809]                                 | 17.5   | 14.5   | <b>-1.20</b> | 0.0011   |
| SGSM2    | small G protein signaling modulator 2 [Source:HGNC Symbol;Acc:HGNC:29026]                   | 11.1   | 9.2    | <b>-1.20</b> | 0.00069  |
| TNC      | tenascin C [Source:HGNC Symbol;Acc:HGNC:5318]                                               | 637.6  | 526.2  | <b>-1.20</b> | 0.0060   |
| CDADC1   | cytidine and dCMP deaminase domain containing 1 [Source:HGNC Symbol;Acc:HGNC:20299]         | 5.6    | 4.6    | <b>-1.20</b> | 0.038    |

|          |                                                                                     |       |       |              |          |
|----------|-------------------------------------------------------------------------------------|-------|-------|--------------|----------|
| DLG4     | discs large MAGUK scaffold protein 4 [Source:HGNC Symbol;Acc:HGNC:2903]             | 5.1   | 4.2   | <b>-1.20</b> | 0.022    |
| SLC6A9   | solute carrier family 6 member 9 [Source:HGNC Symbol;Acc:HGNC:11056]                | 18.3  | 15.3  | <b>-1.20</b> | 8.20E-05 |
| CERS4    | ceramide synthase 4 [Source:HGNC Symbol;Acc:HGNC:23747]                             | 5.4   | 4.5   | <b>-1.20</b> | 0.028    |
| C9orf3   | chromosome 9 open reading frame 3 [Source:HGNC Symbol;Acc:HGNC:1361]                | 100.1 | 83.0  | <b>-1.20</b> | 0.00013  |
| PTGFR    | prostaglandin F receptor [Source:HGNC Symbol;Acc:HGNC:9600]                         | 17.7  | 14.7  | <b>-1.20</b> | 0.00011  |
| SASH1    | SAM and SH3 domain containing 1 [Source:HGNC Symbol;Acc:HGNC:19182]                 | 53.4  | 44.2  | <b>-1.20</b> | 0.0075   |
| RAPGEFL1 | Rap guanine nucleotide exchange factor like 1 [Source:HGNC Symbol;Acc:HGNC:17428]   | 5.6   | 4.7   | <b>-1.20</b> | 0.038    |
| MEGF10   | multiple EGF like domains 10 [Source:HGNC Symbol;Acc:HGNC:29634]                    | 14.0  | 11.5  | <b>-1.20</b> | 0.027    |
| FKBP11   | FK506 binding protein 11 [Source:HGNC Symbol;Acc:HGNC:18624]                        | 12.5  | 10.2  | <b>-1.19</b> | 0.0054   |
| C17orf58 | chromosome 17 open reading frame 58 [Source:HGNC Symbol;Acc:HGNC:27568]             | 10.8  | 9.1   | <b>-1.19</b> | 0.00068  |
| BDKRB1   | bradykinin receptor B1 [Source:HGNC Symbol;Acc:HGNC:1029]                           | 32.5  | 27.2  | <b>-1.19</b> | 0.00017  |
| LBP      | lipopolysaccharide binding protein [Source:HGNC Symbol;Acc:HGNC:6517]               | 10.2  | 8.4   | <b>-1.19</b> | 0.022    |
| GOLGA8A  | golgin A8 family member A [Source:HGNC Symbol;Acc:HGNC:31972]                       | 12.9  | 10.9  | <b>-1.19</b> | 0.0096   |
| PKIG     | cAMP-dependent protein kinase inhibitor gamma [Source:HGNC Symbol;Acc:HGNC:9019]    | 20.4  | 17.2  | <b>-1.19</b> | 0.0047   |
| IFT43    | intraflagellar transport 43 [Source:HGNC Symbol;Acc:HGNC:29669]                     | 22.3  | 18.6  | <b>-1.19</b> | 0.00095  |
| GALNT2   | polypeptide N-acetylgalactosaminyltransferase 2 [Source:HGNC Symbol;Acc:HGNC:4124]  | 397.5 | 333.0 | <b>-1.19</b> | 0        |
| PGRMC1   | progesterone receptor membrane component 1 [Source:HGNC Symbol;Acc:HGNC:16090]      | 108.2 | 90.8  | <b>-1.19</b> | 6.00E-06 |
| ARHGEF19 | Rho guanine nucleotide exchange factor 19 [Source:HGNC Symbol;Acc:HGNC:26604]       | 12.6  | 10.6  | <b>-1.19</b> | 0.024    |
| HMGNP246 | high mobility group nucleosomal binding domain 2 pseudogene 46                      | 15.8  | 13.3  | <b>-1.19</b> | 4.10E-05 |
| ETS2     | ETS proto-oncogene 2, transcription factor [Source:HGNC Symbol;Acc:HGNC:3489]       | 85.4  | 71.0  | <b>-1.19</b> | 0.00032  |
| MEDAG    | mesenteric estrogen dependent adipogenesis [Source:HGNC Symbol;Acc:HGNC:25926]      | 181.7 | 151.8 | <b>-1.18</b> | 0.00031  |
| FAM162A  | family with sequence similarity 162 member A [Source:HGNC Symbol;Acc:HGNC:17865]    | 30.9  | 25.6  | <b>-1.18</b> | 0.018    |
| SLC39A8  | solute carrier family 39 member 8 [Source:HGNC Symbol;Acc:HGNC:20862]               | 146.7 | 124.1 | <b>-1.18</b> | 0.00016  |
| RIN3     | Ras and Rab interactor 3 [Source:HGNC Symbol;Acc:HGNC:18751]                        | 14.1  | 11.8  | <b>-1.18</b> | 0.00029  |
| PPIL3    | peptidylprolyl isomerase like 3 [Source:HGNC Symbol;Acc:HGNC:9262]                  | 20.6  | 17.3  | <b>-1.18</b> | 0.00045  |
| GLRX     | glutaredoxin [Source:HGNC Symbol;Acc:HGNC:4330]                                     | 108.6 | 91.9  | <b>-1.18</b> | 2.00E-05 |
| CABLES1  | Cdk5 and Abl enzyme substrate 1 [Source:HGNC Symbol;Acc:HGNC:25097]                 | 6.4   | 5.4   | <b>-1.18</b> | 0.016    |
| TTC28    | tetratricopeptide repeat domain 28 [Source:HGNC Symbol;Acc:HGNC:29179]              | 15.4  | 12.9  | <b>-1.18</b> | 0.043    |
| NDUFA4L2 | NDUFA4, mitochondrial complex associated like 2 [Source:HGNC Symbol;Acc:HGNC:29836] | 387.6 | 329.3 | <b>-1.18</b> | 0.00012  |
| CREM     | cAMP responsive element modulator [Source:HGNC Symbol;Acc:HGNC:2352]                | 29.0  | 24.4  | <b>-1.18</b> | 0.00012  |
| PDK1     | pyruvate dehydrogenase kinase 1 [Source:HGNC Symbol;Acc:HGNC:8809]                  | 26.2  | 22.2  | <b>-1.18</b> | 0.00045  |
| ZMYM3    | zinc finger MYM-type containing 3 [Source:HGNC Symbol;Acc:HGNC:13054]               | 5.5   | 4.7   | <b>-1.18</b> | 0.040    |
| BCL2A1   | BCL2 related protein A1 [Source:HGNC Symbol;Acc:HGNC:991]                           | 116.3 | 97.0  | <b>-1.18</b> | 0.00020  |



|          |                                                                                            |        |        |              |          |
|----------|--------------------------------------------------------------------------------------------|--------|--------|--------------|----------|
| HOXA11   | homeobox A11 [Source:HGNC Symbol;Acc:HGNC:5101]                                            | 12.7   | 10.7   | <b>-1.18</b> | 0.029    |
| ADM      | adrenomedullin [Source:HGNC Symbol;Acc:HGNC:259]                                           | 218.5  | 187.4  | <b>-1.18</b> | 0.013    |
| MARCH3   | membrane associated ring-CH-type finger 3 [Source:HGNC Symbol;Acc:HGNC:28728]              | 43.4   | 36.8   | <b>-1.18</b> | 0.00050  |
| BDH2     | 3-hydroxybutyrate dehydrogenase 2 [Source:HGNC Symbol;Acc:HGNC:32389]                      | 8.8    | 7.5    | <b>-1.18</b> | 0.027    |
| WNT5A    | Wnt family member 5A [Source:HGNC Symbol;Acc:HGNC:12784]                                   | 45.7   | 38.5   | <b>-1.18</b> | 0.0022   |
| PTGFRN   | prostaglandin F2 receptor inhibitor [Source:HGNC Symbol;Acc:HGNC:9601]                     | 21.9   | 18.7   | <b>-1.18</b> | 0.0051   |
| ZNF395   | zinc finger protein 395 [Source:HGNC Symbol;Acc:HGNC:18737]                                | 64.6   | 54.8   | <b>-1.18</b> | 0.0027   |
| UGP2     | UDP-glucose pyrophosphorylase 2 [Source:HGNC Symbol;Acc:HGNC:12527]                        | 156.1  | 132.8  | <b>-1.18</b> | 0.00014  |
| PLA2G4A  | phospholipase A2 group IVA [Source:HGNC Symbol;Acc:HGNC:9035]                              | 31.6   | 26.5   | <b>-1.18</b> | 0.0049   |
| DUSP4    | dual specificity phosphatase 4 [Source:HGNC Symbol;Acc:HGNC:3070]                          | 17.3   | 14.7   | <b>-1.17</b> | 0.012    |
| PFKP     | phosphofructokinase, platelet [Source:HGNC Symbol;Acc:HGNC:8878]                           | 85.6   | 73.1   | <b>-1.17</b> | 0.00046  |
| MEI1     | meiotic double-stranded break formation protein 1 [Source:HGNC Symbol;Acc:HGNC:28613]      | 18.6   | 16.0   | <b>-1.17</b> | 0.0035   |
| CHI3L1   | chitinase 3 like 1 [Source:HGNC Symbol;Acc:HGNC:1932]                                      | 2321.5 | 1963.0 | <b>-1.17</b> | 7.00E-06 |
| HSCB     | HscB mitochondrial iron-sulfur cluster cochaperone [Source:HGNC Symbol;Acc:HGNC:28913]     | 9.1    | 7.7    | <b>-1.17</b> | 0.016    |
| PILRA    | paired immunoglobulin like type 2 receptor alpha [Source:HGNC Symbol;Acc:HGNC:20396]       | 33.9   | 28.8   | <b>-1.17</b> | 4.80E-05 |
| C14orf28 | chromosome 14 open reading frame 28 [Source:HGNC Symbol;Acc:HGNC:19834]                    | 7.2    | 6.1    | <b>-1.17</b> | 0.044    |
| B9D1     | B9 domain containing 1 [Source:HGNC Symbol;Acc:HGNC:24123]                                 | 10.7   | 9.1    | <b>-1.17</b> | 0.015    |
| HSPA4L   | heat shock protein family A (Hsp70) member 4 like [Source:HGNC Symbol;Acc:HGNC:17041]      | 11.2   | 9.5    | <b>-1.17</b> | 0.024    |
| PRRX2    | paired related homeobox 2 [Source:HGNC Symbol;Acc:HGNC:21338]                              | 32.9   | 27.7   | <b>-1.17</b> | 0.037    |
| NFIB     | nuclear factor I B [Source:HGNC Symbol;Acc:HGNC:7785]                                      | 18.8   | 15.9   | <b>-1.17</b> | 0.00080  |
| C1RL     | complement C1r subcomponent like [Source:HGNC Symbol;Acc:HGNC:21265]                       | 40.0   | 34.0   | <b>-1.17</b> | 0.00012  |
| NPAS2    | neuronal PAS domain protein 2 [Source:HGNC Symbol;Acc:HGNC:7895]                           | 25.6   | 22.0   | <b>-1.17</b> | 0.0013   |
| PIR      | pirin [Source:HGNC Symbol;Acc:HGNC:30048]                                                  | 11.3   | 9.8    | <b>-1.17</b> | 0.019    |
| NR4A1    | nuclear receptor subfamily 4 group A member 1 [Source:HGNC Symbol;Acc:HGNC:7980]           | 7.6    | 6.5    | <b>-1.17</b> | 0.015    |
| EREG     | epiregulin [Source:HGNC Symbol;Acc:HGNC:3443]                                              | 203.5  | 174.4  | <b>-1.17</b> | 0.00035  |
| KCTD15   | potassium channel tetramerization domain containing 15 [Source:HGNC Symbol;Acc:HGNC:23297] | 13.9   | 11.9   | <b>-1.17</b> | 0.018    |
| TXNDC12  | thioredoxin domain containing 12 [Source:HGNC Symbol;Acc:HGNC:24626]                       | 86.0   | 73.2   | <b>-1.17</b> | 0.0018   |
| TMEM9    | transmembrane protein 9 [Source:HGNC Symbol;Acc:HGNC:18823]                                | 26.1   | 22.1   | <b>-1.17</b> | 0.0088   |
| PFKM     | phosphofructokinase, muscle [Source:HGNC Symbol;Acc:HGNC:8877]                             | 16.8   | 14.4   | <b>-1.17</b> | 0.0027   |
| ARHGAP42 | Rho GTPase activating protein 42 [Source:HGNC Symbol;Acc:HGNC:26545]                       | 57.4   | 49.8   | <b>-1.17</b> | 0.0014   |
| GAS1     | growth arrest specific 1 [Source:HGNC Symbol;Acc:HGNC:4165]                                | 12.2   | 10.4   | <b>-1.17</b> | 0.012    |
| FJX1     | four jointed box 1 [Source:HGNC Symbol;Acc:HGNC:17166]                                     | 22.2   | 18.9   | <b>-1.16</b> | 0.0033   |
| SIX4     | SIX homeobox 4 [Source:HGNC Symbol;Acc:HGNC:10890]                                         | 26.9   | 23.1   | <b>-1.16</b> | 0.0025   |

|          |                                                                                                   |       |       |              |         |
|----------|---------------------------------------------------------------------------------------------------|-------|-------|--------------|---------|
| EGLN3    | egl-9 family hypoxia inducible factor 3 [Source:HGNC Symbol;Acc:HGNC:14661]                       | 30.7  | 26.6  | <b>-1.16</b> | 0.011   |
| DHRS3    | dehydrogenase/reductase 3 [Source:HGNC Symbol;Acc:HGNC:17693]                                     | 53.9  | 47.0  | <b>-1.16</b> | 0.034   |
| IL1RL1   | interleukin 1 receptor like 1 [Source:HGNC Symbol;Acc:HGNC:5998]                                  | 24.8  | 21.1  | <b>-1.16</b> | 0.024   |
| MPI      | mannose phosphate isomerase [Source:HGNC Symbol;Acc:HGNC:7216]                                    | 21.7  | 18.7  | <b>-1.16</b> | 0.0045  |
| LONP1    | lon peptidase 1, mitochondrial [Source:HGNC Symbol;Acc:HGNC:9479]                                 | 103.6 | 89.0  | <b>-1.16</b> | 0.00080 |
| NOL3     | nucleolar protein 3 [Source:HGNC Symbol;Acc:HGNC:7869]                                            | 12.4  | 11.6  | <b>-1.16</b> | 0.0042  |
| SEMA4D   | semaphorin 4D [Source:HGNC Symbol;Acc:HGNC:10732]                                                 | 15.6  | 13.6  | <b>-1.16</b> | 0.023   |
| ST3GAL4  | ST3 beta-galactoside alpha-2,3-sialyltransferase 4 [Source:HGNC Symbol;Acc:HGNC:10864]            | 11.4  | 9.9   | <b>-1.16</b> | 0.034   |
| IFITM3   | interferon induced transmembrane protein 3 [Source:HGNC Symbol;Acc:HGNC:5414]                     | 62.0  | 53.2  | <b>-1.16</b> | 0.014   |
| CEBPB    | CCAAT/enhancer binding protein beta [Source:HGNC Symbol;Acc:HGNC:1834]                            | 331.2 | 284.5 | <b>-1.16</b> | 0.0077  |
| DOK1     | docking protein 1 [Source:HGNC Symbol;Acc:HGNC:2990]                                              | 30.5  | 26.6  | <b>-1.16</b> | 0.012   |
| TSPYL2   | TSPY like 2 [Source:HGNC Symbol;Acc:HGNC:24358]                                                   | 70.8  | 61.0  | <b>-1.16</b> | 0.00089 |
| HS3ST3A1 | heparan sulfate-glucosamine 3-sulfotransferase 3A1 [Source:HGNC Symbol;Acc:HGNC:5196]             | 16.6  | 14.1  | <b>-1.16</b> | 0.012   |
| RERG     | RAS like estrogen regulated growth inhibitor [Source:HGNC Symbol;Acc:HGNC:15980]                  | 36.9  | 32.3  | <b>-1.16</b> | 0.019   |
| SIX5     | SIX homeobox 5 [Source:HGNC Symbol;Acc:HGNC:10891]                                                | 27.3  | 23.5  | <b>-1.15</b> | 0.024   |
| SLC33A1  | solute carrier family 33 member 1 [Source:HGNC Symbol;Acc:HGNC:95]                                | 29.4  | 25.4  | <b>-1.15</b> | 0.0035  |
| RNFT1    | ring finger protein, transmembrane 1 [Source:HGNC Symbol;Acc:HGNC:30206]                          | 6.8   | 5.9   | <b>-1.15</b> | 0.040   |
| ELL2     | elongation factor for RNA polymerase II 2 [Source:HGNC Symbol;Acc:HGNC:17064]                     | 240.9 | 208.4 | <b>-1.15</b> | 0.0011  |
| DTX3     | deltex E3 ubiquitin ligase 3 [Source:HGNC Symbol;Acc:HGNC:24457]                                  | 11.3  | 9.8   | <b>-1.15</b> | 0.040   |
| SLC2A3   | solute carrier family 2 member 3 [Source:HGNC Symbol;Acc:HGNC:11007]                              | 39.3  | 34.2  | <b>-1.15</b> | 0.0055  |
| GAREM2   | GRB2 associated regulator of MAPK1 subtype 2 [Source:HGNC Symbol;Acc:HGNC:27172]                  | 8.9   | 7.7   | <b>-1.15</b> | 0.039   |
| ELOVL7   | ELOVL fatty acid elongase 7 [Source:HGNC Symbol;Acc:HGNC:26292]                                   | 35.0  | 30.5  | <b>-1.15</b> | 0.0036  |
| ADH5     | alcohol dehydrogenase 5 (class III), chi polypeptide [Source:HGNC Symbol;Acc:HGNC:253]            | 54.7  | 47.4  | <b>-1.15</b> | 0.00089 |
| SMARCA1  | SWI/SNF related, matrix associated, actin dependent regulator of chromatin, subfamily a, member 1 | 23.5  | 20.2  | <b>-1.15</b> | 0.0049  |
| ANGPTL1  | angiopoietin like 1 [Source:HGNC Symbol;Acc:HGNC:489]                                             | 12.1  | 10.5  | <b>-1.15</b> | 0.030   |
| PITPNM1  | phosphatidylinositol transfer protein membrane associated 1 [Source:HGNC Symbol;Acc:HGNC:9003]    | 17.7  | 15.4  | <b>-1.15</b> | 0.024   |
| C11orf49 | chromosome 11 open reading frame 49 [Source:HGNC Symbol;Acc:HGNC:28720]                           | 12.0  | 10.4  | <b>-1.15</b> | 0.0071  |
| RNF145   | ring finger protein 145 [Source:HGNC Symbol;Acc:HGNC:20853]                                       | 73.0  | 63.6  | <b>-1.15</b> | 0.0013  |
| RAB34    | RAB34, member RAS oncogene family [Source:HGNC Symbol;Acc:HGNC:16519]                             | 45.2  | 39.3  | <b>-1.15</b> | 0.023   |
| RHBDD3   | rhomboid domain containing 3 [Source:HGNC Symbol;Acc:HGNC:1308]                                   | 17.0  | 14.8  | <b>-1.15</b> | 0.019   |
| TMED1    | transmembrane p24 trafficking protein 1 [Source:HGNC Symbol;Acc:HGNC:17291]                       | 33.4  | 28.9  | <b>-1.15</b> | 0.013   |
| DDIT4    | DNA damage inducible transcript 4 [Source:HGNC Symbol;Acc:HGNC:24944]                             | 275.5 | 238.2 | <b>-1.15</b> | 0.0031  |
| PTOV1    | prostate tumor overexpressed 1 [Source:HGNC Symbol;Acc:HGNC:9632]                                 | 31.2  | 26.8  | <b>-1.15</b> | 0.023   |

|           |                                                                                                  |        |       |              |        |
|-----------|--------------------------------------------------------------------------------------------------|--------|-------|--------------|--------|
| FAM126A   | family with sequence similarity 126 member A [Source:HGNC Symbol;Acc:HGNC:24587]                 | 55.9   | 48.1  | <b>-1.15</b> | 0.0045 |
| LINC01588 | long intergenic non-protein coding RNA 1588 [Source:HGNC Symbol;Acc:HGNC:27503]                  | 13.3   | 11.5  | <b>-1.15</b> | 0.017  |
| MBNL2     | muscleblind like splicing regulator 2 [Source:HGNC Symbol;Acc:HGNC:16746]                        | 46.8   | 40.7  | <b>-1.15</b> | 0.031  |
| EFCAB2    | EF-hand calcium binding domain 2 [Source:HGNC Symbol;Acc:HGNC:28166]                             | 12.3   | 10.7  | <b>-1.15</b> | 0.043  |
| MIB2      | mindbomb E3 ubiquitin protein ligase 2 [Source:HGNC Symbol;Acc:HGNC:30577]                       | 34.6   | 30.0  | <b>-1.14</b> | 0.0042 |
| G0S2      | G0/G1 switch 2 [Source:HGNC Symbol;Acc:HGNC:30229]                                               | 1125.3 | 971.9 | <b>-1.14</b> | 0.026  |
| SLC7A5    | solute carrier family 7 member 5 [Source:HGNC Symbol;Acc:HGNC:11063]                             | 223.5  | 193.2 | <b>-1.14</b> | 0.0030 |
| ZHX2      | zinc fingers and homeoboxes 2 [Source:HGNC Symbol;Acc:HGNC:18513]                                | 77.0   | 66.9  | <b>-1.14</b> | 0.0026 |
| MAGED1    | MAGE family member D1 [Source:HGNC Symbol;Acc:HGNC:6813]                                         | 54.1   | 46.9  | <b>-1.14</b> | 0.0049 |
| FAM69A    | family with sequence similarity 69 member A [Source:HGNC Symbol;Acc:HGNC:32213]                  | 11.2   | 9.8   | <b>-1.14</b> | 0.029  |
| VDR       | vitamin D (1,25- dihydroxyvitamin D3) receptor [Source:HGNC Symbol;Acc:HGNC:12679]               | 46.7   | 40.8  | <b>-1.14</b> | 0.0025 |
| CHRD2     | chordin like 2 [Source:HGNC Symbol;Acc:HGNC:24168]                                               | 34.0   | 29.4  | <b>-1.14</b> | 0.0033 |
| JAK2      | Janus kinase 2 [Source:HGNC Symbol;Acc:HGNC:6192]                                                | 49.3   | 42.9  | <b>-1.14</b> | 0.0023 |
| PBXIP1    | PBX homeobox interacting protein 1 [Source:HGNC Symbol;Acc:HGNC:21199]                           | 70.3   | 60.8  | <b>-1.14</b> | 0.022  |
| DNAJC1    | DnaJ heat shock protein family (Hsp40) member C1 [Source:HGNC Symbol;Acc:HGNC:20090]             | 80.5   | 70.0  | <b>-1.14</b> | 0.0052 |
| COMMD3    | COMM domain containing 3 [Source:HGNC Symbol;Acc:HGNC:23332]                                     | 23.4   | 20.5  | <b>-1.14</b> | 0.039  |
| BTF3L4    | basic transcription factor 3 like 4 [Source:HGNC Symbol;Acc:HGNC:30547]                          | 41.8   | 36.6  | <b>-1.14</b> | 0.019  |
| LDLRAD3   | low density lipoprotein receptor class A domain containing 3 [Source:HGNC Symbol;Acc:HGNC:27046] | 32.2   | 28.1  | <b>-1.14</b> | 0.017  |
| TNIK      | TRAF2 and NCK interacting kinase [Source:HGNC Symbol;Acc:HGNC:30765]                             | 9.8    | 8.6   | <b>-1.14</b> | 0.046  |
| ANTXR1    | anthrax toxin receptor 1 [Source:HGNC Symbol;Acc:HGNC:21014]                                     | 44.5   | 38.9  | <b>-1.14</b> | 0.016  |
| FBXO2     | F-box protein 2 [Source:HGNC Symbol;Acc:HGNC:13581]                                              | 39.7   | 35.6  | <b>-1.14</b> | 0.044  |
| PGK1      | phosphoglycerate kinase 1 [Source:HGNC Symbol;Acc:HGNC:8896]                                     | 549.9  | 479.6 | <b>-1.14</b> | 0.0026 |
| LOXL2     | lysyl oxidase like 2 [Source:HGNC Symbol;Acc:HGNC:6666]                                          | 75.7   | 67.0  | <b>-1.14</b> | 0.0038 |
| PLEKHG3   | pleckstrin homology and RhoGEF domain containing G3 [Source:HGNC Symbol;Acc:HGNC:20364]          | 12.4   | 10.9  | <b>-1.14</b> | 0.027  |
| LPXN      | leupaxin [Source:HGNC Symbol;Acc:HGNC:14061]                                                     | 24.0   | 21.2  | <b>-1.14</b> | 0.013  |
| COL5A1    | collagen type V alpha 1 chain [Source:HGNC Symbol;Acc:HGNC:2209]                                 | 125.9  | 111.1 | <b>-1.14</b> | 0.018  |
| IL1R1     | interleukin 1 receptor type 1 [Source:HGNC Symbol;Acc:HGNC:5993]                                 | 46.2   | 40.2  | <b>-1.14</b> | 0.029  |
| PRMT1     | protein arginine methyltransferase 1 [Source:HGNC Symbol;Acc:HGNC:5187]                          | 56.0   | 49.1  | <b>-1.14</b> | 0.0078 |
| EPHB4     | EPH receptor B4 [Source:HGNC Symbol;Acc:HGNC:3395]                                               | 8.1    | 7.1   | <b>-1.14</b> | 0.047  |
| GNB5      | G protein subunit beta 5 [Source:HGNC Symbol;Acc:HGNC:4401]                                      | 16.4   | 14.4  | <b>-1.14</b> | 0.0061 |
| HDHD5     | haloacid dehalogenase like hydrolase domain containing 5 [Source:HGNC Symbol;Acc:HGNC:1843]      | 20.3   | 17.7  | <b>-1.13</b> | 0.027  |
| FAM57A    | family with sequence similarity 57 member A [Source:HGNC Symbol;Acc:HGNC:29646]                  | 16.7   | 14.7  | <b>-1.13</b> | 0.039  |
| CDK5RAP2  | CDK5 regulatory subunit associated protein 2 [Source:HGNC Symbol;Acc:HGNC:18672]                 | 48.4   | 42.5  | <b>-1.13</b> | 0.0045 |

|           |                                                                                                |        |        |              |         |
|-----------|------------------------------------------------------------------------------------------------|--------|--------|--------------|---------|
| AK3       | adenylate kinase 3 [Source:HGNC Symbol;Acc:HGNC:17376]                                         | 70.5   | 62.4   | <b>-1.13</b> | 0.011   |
| ARRDC2    | arrestin domain containing 2 [Source:HGNC Symbol;Acc:HGNC:25225]                               | 70.0   | 61.5   | <b>-1.13</b> | 0.0020  |
| OSGIN2    | oxidative stress induced growth inhibitor family member 2 [Source:HGNC Symbol;Acc:HGNC:1355]   | 130.6  | 115.0  | <b>-1.13</b> | 0.0013  |
| NTPCR     | nucleoside-triphosphatase, cancer-related [Source:HGNC Symbol;Acc:HGNC:28204]                  | 18.7   | 16.4   | <b>-1.13</b> | 0.022   |
| NFKB2     | nuclear factor kappa B subunit 2 [Source:HGNC Symbol;Acc:HGNC:7795]                            | 285.5  | 251.3  | <b>-1.13</b> | 0.0022  |
| ARMCX2    | armadillo repeat containing, X-linked 2 [Source:HGNC Symbol;Acc:HGNC:16869]                    | 46.4   | 40.7   | <b>-1.13</b> | 0.0061  |
| CYP1B1    | cytochrome P450 family 1 subfamily B member 1 [Source:HGNC Symbol;Acc:HGNC:2597]               | 796.1  | 704.4  | <b>-1.13</b> | 0.0062  |
| SULF2     | sulfatase 2 [Source:HGNC Symbol;Acc:HGNC:20392]                                                | 116.6  | 103.4  | <b>-1.13</b> | 0.019   |
| SREK1IP1  | SREK1 interacting protein 1 [Source:HGNC Symbol;Acc:HGNC:26716]                                | 24.2   | 21.3   | <b>-1.13</b> | 0.028   |
| FOXP1     | forkhead box P1 [Source:HGNC Symbol;Acc:HGNC:3823]                                             | 48.6   | 43.0   | <b>-1.13</b> | 0.014   |
| GABARAPL1 | GABA type A receptor associated protein like 1 [Source:HGNC Symbol;Acc:HGNC:4068]              | 98.6   | 87.5   | <b>-1.13</b> | 0.0035  |
| C1S       | complement C1s [Source:HGNC Symbol;Acc:HGNC:1247]                                              | 891.1  | 788.2  | <b>-1.13</b> | 0.0010  |
| CPPED1    | calcineurin like phosphoesterase domain containing 1 [Source:HGNC Symbol;Acc:HGNC:25632]       | 20.1   | 17.8   | <b>-1.13</b> | 0.0053  |
| THRB      | thyroid hormone receptor beta [Source:HGNC Symbol;Acc:HGNC:11799]                              | 21.7   | 19.2   | <b>-1.13</b> | 0.025   |
| PENK      | proenkephalin [Source:HGNC Symbol;Acc:HGNC:8831]                                               | 74.2   | 64.6   | <b>-1.13</b> | 0.049   |
| CKAP4     | cytoskeleton associated protein 4 [Source:HGNC Symbol;Acc:HGNC:16991]                          | 273.3  | 241.4  | <b>-1.13</b> | 0.0047  |
| PPWD1     | peptidylprolyl isomerase domain and WD repeat containing 1 [Source:HGNC Symbol;Acc:HGNC:28954] | 28.6   | 25.3   | <b>-1.13</b> | 0.0092  |
| CES2      | carboxylesterase 2 [Source:HGNC Symbol;Acc:HGNC:1864]                                          | 40.4   | 35.8   | <b>-1.13</b> | 0.0031  |
| YIPF1     | Yip1 domain family member 1 [Source:HGNC Symbol;Acc:HGNC:25231]                                | 19.3   | 17.0   | <b>-1.13</b> | 0.046   |
| EIF2D     | eukaryotic translation initiation factor 2D [Source:HGNC Symbol;Acc:HGNC:6583]                 | 15.0   | 13.3   | <b>-1.13</b> | 0.034   |
| MCOLN2    | mucolipin 2 [Source:HGNC Symbol;Acc:HGNC:13357]                                                | 12.8   | 11.4   | <b>-1.13</b> | 0.023   |
| UNKL      | unkempt family like zinc finger [Source:HGNC Symbol;Acc:HGNC:14184]                            | 59.4   | 52.9   | <b>-1.13</b> | 0.0051  |
| FSTL1     | folliculin like 1 [Source:HGNC Symbol;Acc:HGNC:3972]                                           | 1409.4 | 1239.8 | <b>-1.12</b> | 0.00100 |
| QSOX1     | quiescin sulfhydryl oxidase 1 [Source:HGNC Symbol;Acc:HGNC:9756]                               | 746.3  | 659.8  | <b>-1.12</b> | 0.0038  |
| GTPBP2    | GTP binding protein 2 [Source:HGNC Symbol;Acc:HGNC:4670]                                       | 113.2  | 100.7  | <b>-1.12</b> | 0.0041  |
| RELB      | RELB proto-oncogene, NF-kB subunit [Source:HGNC Symbol;Acc:HGNC:9956]                          | 121.0  | 107.1  | <b>-1.12</b> | 0.024   |
| ACOT13    | acyl-CoA thioesterase 13 [Source:HGNC Symbol;Acc:HGNC:20999]                                   | 21.2   | 18.9   | <b>-1.12</b> | 0.047   |
| NTN4      | netrin 4 [Source:HGNC Symbol;Acc:HGNC:13658]                                                   | 220.3  | 197.2  | <b>-1.12</b> | 0.014   |
| GMPPB     | GDP-mannose pyrophosphorylase B [Source:HGNC Symbol;Acc:HGNC:22932]                            | 62.1   | 55.0   | <b>-1.12</b> | 0.0025  |
| FBXO42    | F-box protein 42 [Source:HGNC Symbol;Acc:HGNC:29249]                                           | 26.7   | 23.8   | <b>-1.12</b> | 0.016   |
| SEMA3C    | semaphorin 3C [Source:HGNC Symbol;Acc:HGNC:10725]                                              | 766.9  | 674.5  | <b>-1.12</b> | 0.029   |
| PHF10     | PHD finger protein 10 [Source:HGNC Symbol;Acc:HGNC:18250]                                      | 32.5   | 28.8   | <b>-1.12</b> | 0.023   |
| PIH1D1    | PIH1 domain containing 1 [Source:HGNC Symbol;Acc:HGNC:26075]                                   | 28.9   | 25.8   | <b>-1.12</b> | 0.034   |

|            |                                                                                               |        |        |              |        |
|------------|-----------------------------------------------------------------------------------------------|--------|--------|--------------|--------|
| PLPPR2     | phospholipid phosphatase related 2 [Source:HGNC Symbol;Acc:HGNC:29566]                        | 28.8   | 25.7   | <b>-1.12</b> | 0.037  |
| P4HA1      | prolyl 4-hydroxylase subunit alpha 1 [Source:HGNC Symbol;Acc:HGNC:8546]                       | 403.2  | 363.5  | <b>-1.12</b> | 0.014  |
| NMI        | N-myc and STAT interactor [Source:HGNC Symbol;Acc:HGNC:7854]                                  | 16.0   | 14.3   | <b>-1.12</b> | 0.048  |
| CUL7       | cullin 7 [Source:HGNC Symbol;Acc:HGNC:21024]                                                  | 65.1   | 57.9   | <b>-1.12</b> | 0.013  |
| BNIP3      | BCL2 interacting protein 3 [Source:HGNC Symbol;Acc:HGNC:1084]                                 | 195.2  | 173.8  | <b>-1.12</b> | 0.021  |
| CTSL       | cathepsin L [Source:HGNC Symbol;Acc:HGNC:2537]                                                | 402.4  | 355.6  | <b>-1.12</b> | 0.026  |
| FKBP14     | FK506 binding protein 14 [Source:HGNC Symbol;Acc:HGNC:18625]                                  | 34.1   | 30.3   | <b>-1.12</b> | 0.0086 |
| EGLN1      | egl-9 family hypoxia inducible factor 1 [Source:HGNC Symbol;Acc:HGNC:1232]                    | 144.6  | 128.9  | <b>-1.12</b> | 0.023  |
| SERPINH1   | serpin family H member 1 [Source:HGNC Symbol;Acc:HGNC:1546]                                   | 55.1   | 49.2   | <b>-1.12</b> | 0.0083 |
| RCL1       | RNA terminal phosphate cyclase like 1 [Source:HGNC Symbol;Acc:HGNC:17687]                     | 18.9   | 16.8   | <b>-1.12</b> | 0.025  |
| GPI        | glucose-6-phosphate isomerase [Source:HGNC Symbol;Acc:HGNC:4458]                              | 70.3   | 62.3   | <b>-1.12</b> | 0.020  |
| CCL20      | C-C motif chemokine ligand 20 [Source:HGNC Symbol;Acc:HGNC:10619]                             | 6787.1 | 6037.1 | <b>-1.12</b> | 0.024  |
| PER1       | period circadian clock 1 [Source:HGNC Symbol;Acc:HGNC:8845]                                   | 40.0   | 35.7   | <b>-1.12</b> | 0.0091 |
| DHPS       | deoxyhypusine synthase [Source:HGNC Symbol;Acc:HGNC:2869]                                     | 30.4   | 27.1   | <b>-1.12</b> | 0.026  |
| GPAT3      | glycerol-3-phosphate acyltransferase 3 [Source:HGNC Symbol;Acc:HGNC:28157]                    | 20.4   | 18.2   | <b>-1.12</b> | 0.016  |
| FUT11      | fucosyltransferase 11 [Source:HGNC Symbol;Acc:HGNC:19233]                                     | 39.3   | 35.0   | <b>-1.12</b> | 0.049  |
| SIDT2      | SID1 transmembrane family member 2 [Source:HGNC Symbol;Acc:HGNC:24272]                        | 30.3   | 27.1   | <b>-1.11</b> | 0.016  |
| TMEM165    | transmembrane protein 165 [Source:HGNC Symbol;Acc:HGNC:30760]                                 | 164.6  | 147.7  | <b>-1.11</b> | 0.0088 |
| STAT2      | signal transducer and activator of transcription 2 [Source:HGNC Symbol;Acc:HGNC:11363]        | 50.9   | 45.4   | <b>-1.11</b> | 0.047  |
| SELENOK    | selenoprotein K [Source:HGNC Symbol;Acc:HGNC:30394]                                           | 97.6   | 86.7   | <b>-1.11</b> | 0.027  |
| SRSF9      | serine and arginine rich splicing factor 9 [Source:HGNC Symbol;Acc:HGNC:10791]                | 56.8   | 50.5   | <b>-1.11</b> | 0.049  |
| FOSL2      | FOS like 2, AP-1 transcription factor subunit [Source:HGNC Symbol;Acc:HGNC:3798]              | 214.4  | 191.5  | <b>-1.11</b> | 0.028  |
| ST6GALNAC4 | ST6 N-acetylgalactosaminide alpha-2,6-sialyltransferase 4 [Source:HGNC Symbol;Acc:HGNC:17846] | 37.5   | 33.7   | <b>-1.11</b> | 0.032  |
| AZI2       | 5-azacytidine induced 2 [Source:HGNC Symbol;Acc:HGNC:24002]                                   | 33.7   | 30.2   | <b>-1.11</b> | 0.0089 |
| SGSH       | N-sulfoglucosamine sulfohydrolase [Source:HGNC Symbol;Acc:HGNC:10818]                         | 31.9   | 28.5   | <b>-1.11</b> | 0.045  |
| SDC2       | syndecan 2 [Source:HGNC Symbol;Acc:HGNC:10659]                                                | 245.5  | 218.6  | <b>-1.11</b> | 0.018  |
| TPM4       | tropomyosin 4 [Source:HGNC Symbol;Acc:HGNC:12013]                                             | 70.9   | 63.9   | <b>-1.11</b> | 0.019  |
| ERGIC1     | endoplasmic reticulum-golgi intermediate compartment 1 [Source:HGNC Symbol;Acc:HGNC:29205]    | 83.5   | 75.2   | <b>-1.11</b> | 0.012  |
| VEGFA      | vascular endothelial growth factor A [Source:HGNC Symbol;Acc:HGNC:12680]                      | 609.6  | 547.1  | <b>-1.11</b> | 0.026  |
| CPXM2      | carboxypeptidase X, M14 family member 2 [Source:HGNC Symbol;Acc:HGNC:26977]                   | 41.7   | 37.2   | <b>-1.11</b> | 0.016  |
| ACO1       | aconitase 1 [Source:HGNC Symbol;Acc:HGNC:117]                                                 | 85.3   | 76.6   | <b>-1.11</b> | 0.0070 |
| NQO2       | N-ribosyldihyronicotinamide:quinone reductase 2 [Source:HGNC Symbol;Acc:HGNC:7856]            | 33.0   | 29.5   | <b>-1.11</b> | 0.042  |
| CUX1       | cut like homeobox 1 [Source:HGNC Symbol;Acc:HGNC:2557]                                        | 69.8   | 62.6   | <b>-1.11</b> | 0.038  |



|          |                                                                                                  |        |        |              |        |
|----------|--------------------------------------------------------------------------------------------------|--------|--------|--------------|--------|
| GID4     | GID complex subunit 4 homolog [Source:HGNC Symbol;Acc:HGNC:28453]                                | 17.4   | 15.7   | <b>-1.11</b> | 0.029  |
| NCKIPSD  | NCK interacting protein with SH3 domain [Source:HGNC Symbol;Acc:HGNC:15486]                      | 24.1   | 21.6   | <b>-1.11</b> | 0.043  |
| PRKAR1A  | protein kinase cAMP-dependent type I regulatory subunit alpha [Source:HGNC Symbol;Acc:HGNC:9388] | 202.2  | 181.7  | <b>-1.11</b> | 0.041  |
| UNK      | unkempt family zinc finger [Source:HGNC Symbol;Acc:HGNC:29369]                                   | 24.2   | 21.8   | <b>-1.11</b> | 0.029  |
| BZW1     | basic leucine zipper and W2 domains 1 [Source:HGNC Symbol;Acc:HGNC:18380]                        | 432.3  | 390.0  | <b>-1.11</b> | 0.019  |
| SLC25A28 | solute carrier family 25 member 28 [Source:HGNC Symbol;Acc:HGNC:23472]                           | 63.3   | 57.1   | <b>-1.11</b> | 0.036  |
| MAFB     | MAF bZIP transcription factor B [Source:HGNC Symbol;Acc:HGNC:6408]                               | 224.9  | 202.2  | <b>-1.10</b> | 0.016  |
| GNPDA2   | glucosamine-6-phosphate deaminase 2 [Source:HGNC Symbol;Acc:HGNC:21526]                          | 33.2   | 30.0   | <b>-1.10</b> | 0.031  |
| GMPPA    | GDP-mannose pyrophosphorylase A [Source:HGNC Symbol;Acc:HGNC:22923]                              | 50.5   | 45.3   | <b>-1.10</b> | 0.040  |
| INTS10   | integrator complex subunit 10 [Source:HGNC Symbol;Acc:HGNC:25548]                                | 31.9   | 28.8   | <b>-1.10</b> | 0.034  |
| MLH1     | mutL homolog 1 [Source:HGNC Symbol;Acc:HGNC:7127]                                                | 42.6   | 38.5   | <b>-1.10</b> | 0.018  |
| PLPP5    | phospholipid phosphatase 5 [Source:HGNC Symbol;Acc:HGNC:25026]                                   | 74.8   | 67.8   | <b>-1.10</b> | 0.024  |
| WIPI1    | WD repeat domain, phosphoinositide interacting 1 [Source:HGNC Symbol;Acc:HGNC:25471]             | 35.4   | 32.1   | <b>-1.10</b> | 0.024  |
| VLDLR    | very low density lipoprotein receptor [Source:HGNC Symbol;Acc:HGNC:12698]                        | 77.4   | 70.3   | <b>-1.10</b> | 0.039  |
| PDGFRA   | platelet derived growth factor receptor alpha [Source:HGNC Symbol;Acc:HGNC:8803]                 | 80.6   | 72.8   | <b>-1.10</b> | 0.030  |
| SPG20    | spastic paraplegia 20 (Troyer syndrome) [Source:HGNC Symbol;Acc:HGNC:18514]                      | 26.9   | 25.5   | <b>-1.10</b> | 0.029  |
| TMEM94   | transmembrane protein 94 [Source:HGNC Symbol;Acc:HGNC:28983]                                     | 24.0   | 21.8   | <b>-1.10</b> | 0.037  |
| THUMPD3  | THUMP domain containing 3 [Source:HGNC Symbol;Acc:HGNC:24493]                                    | 30.6   | 27.7   | <b>-1.10</b> | 0.049  |
| ESYT1    | extended synaptotagmin 1 [Source:HGNC Symbol;Acc:HGNC:29534]                                     | 44.7   | 40.5   | <b>-1.10</b> | 0.043  |
| HSPA5    | heat shock protein family A (Hsp70) member 5 [Source:HGNC Symbol;Acc:HGNC:5238]                  | 1797.5 | 1620.3 | <b>-1.10</b> | 0.0079 |
| ZFP36L1  | ZFP36 ring finger protein like 1 [Source:HGNC Symbol;Acc:HGNC:1107]                              | 338.2  | 308.9  | <b>-1.09</b> | 0.043  |
| SLC35E1  | solute carrier family 35 member E1 [Source:HGNC Symbol;Acc:HGNC:20803]                           | 85.5   | 78.0   | <b>-1.09</b> | 0.033  |
| ARMCX3   | armadillo repeat containing, X-linked 3 [Source:HGNC Symbol;Acc:HGNC:24065]                      | 44.6   | 40.6   | <b>-1.09</b> | 0.046  |
| TLE1     | transducin like enhancer of split 1 [Source:HGNC Symbol;Acc:HGNC:11837]                          | 25.1   | 22.9   | <b>-1.09</b> | 0.049  |

Mean = trimmed mean of M-values (TMM) normalized counts

adj. p = FDR-adjusted p-value
