# Supplementary material for: Effects of ibuprofen on gene expression in chondrocytes from patients with osteoarthritis as determined by RNA-Seq
Source: HighWire-hosted journal article supplement (doi:10.1136/rmdopen-2021-001657), 2021-09-01
Supplement: rmdopen-2021-001657supp004_data_supplement.pdf [file rmdopen-2021-001657supp004_data_supplement.pdf]

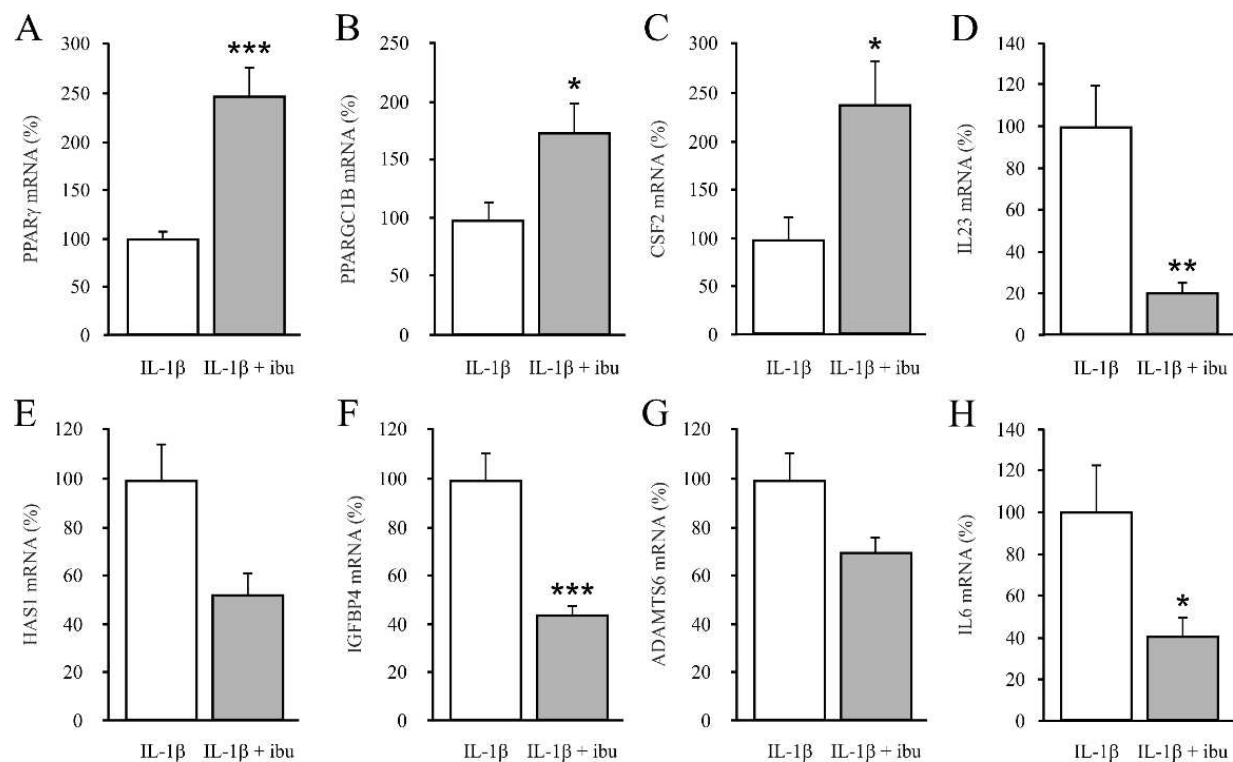

**Fig. S4: RT-PCR confirmation of differential expression of selected inflammation- and cartilage-related genes in a separate group of ten patients.** Chondrocytes isolated from OA patients were cultured for 24 h in the presence of IL-1 $\beta$  (100 pg/ml) with or without ibuprofen (10  $\mu$ M). mRNA expression levels of *PPAR $\gamma$*  (A), *PPARGC1B* (B), *CSF2* (C), *IL23* (D), *HAS1* (E), *IGFBP4* (F), *ADAMTS6* (G) and *IL6* (H) were studied with quantitative RT-PCR and normalized against GAPDH. The results were compared against control, which was set as 100 %. The results are expressed as mean  $\pm$  SEM, n = 10. \*:  $p < 0.05$ , \*\*:  $p < 0.01$  and \*\*\*:  $p < 0.001$ , compared to the cells treated with IL-1 $\beta$  alone.
